# Supplementary material for: Phase transition of WTAP regulates m6A modification of interferon-stimulated genes
Source: eLife journal article supplement (doi:10.7554/elife.100601), 2024-09-26
Supplement: fig4-figsupp1-data1 [file elife-100601-fig4-figsupp1-data1-v1.zip]

|                              |   |    |           |           |
|------------------------------|---|----|-----------|-----------|
| <i>WTAP</i> <sup>sgRNA</sup> | + | +  | +         | +         |
| Flag-WTAP                    | - | WT | 5ST<br>-D | 5ST<br>-A |

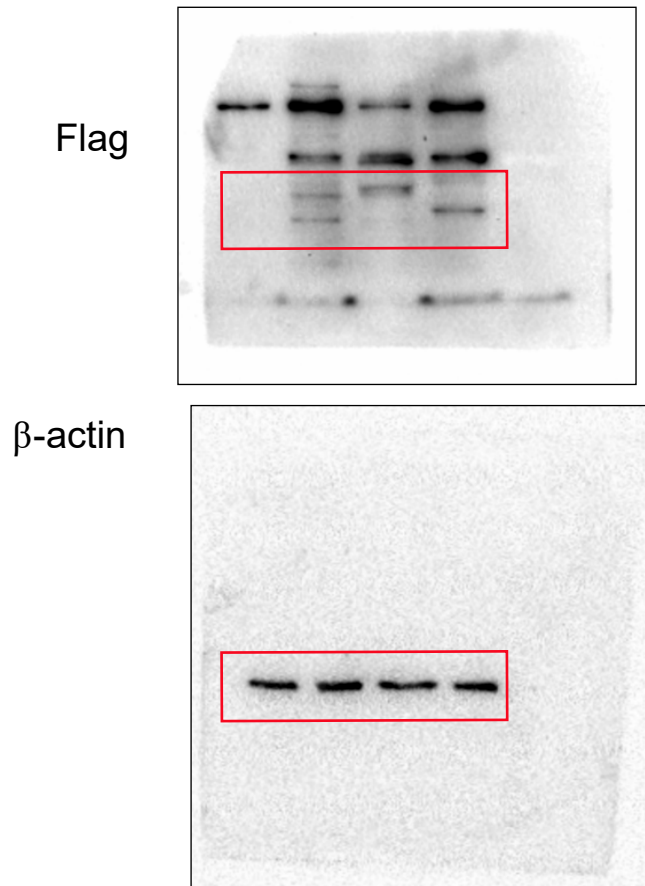

Figure 4-figure supplement 1F, source data 1: Original membranes corresponding to Figure 4-figure supplement 1F.
