# Supplementary material for: Phase transition of WTAP regulates m6A modification of interferon-stimulated genes
Source: eLife journal article supplement (doi:10.7554/elife.100601), 2024-09-26
Supplement: fig5-figsupp1-data1 [file elife-100601-fig5-figsupp1-data1-v1.zip]

| Group        | 1 | 2 | 3 | 4 | 5 | 6 | 7 |
|--------------|---|---|---|---|---|---|---|
| GFP-STAT1    | + | - | - | - | + | + | + |
| mCherry-WTAP | - | + | - | + | - | + | + |
| CFP-METTL3   | - | - | + | + | + | - | + |

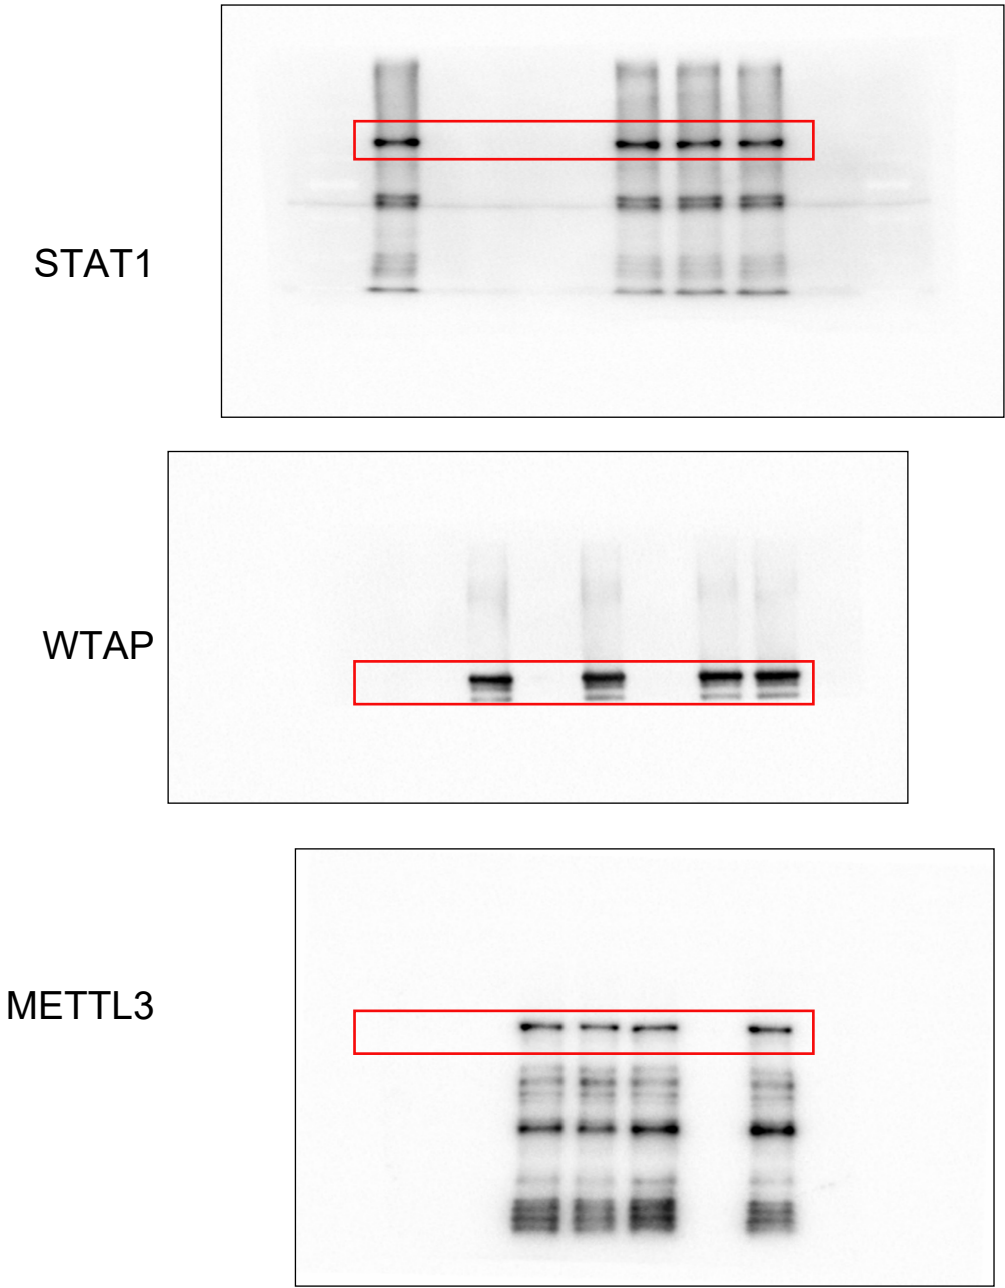

Figure 5-figure supplement 1F, source data 1: Original membranes corresponding to Figure 5-figure supplement 1F.
