# Supplementary material for: Phase transition of WTAP regulates m6A modification of interferon-stimulated genes
Source: eLife journal article supplement (doi:10.7554/elife.100601), 2024-09-26
Supplement: fig5-figsupp1-data1 [file elife-100601-fig5-figsupp1-data1-v1.zip]

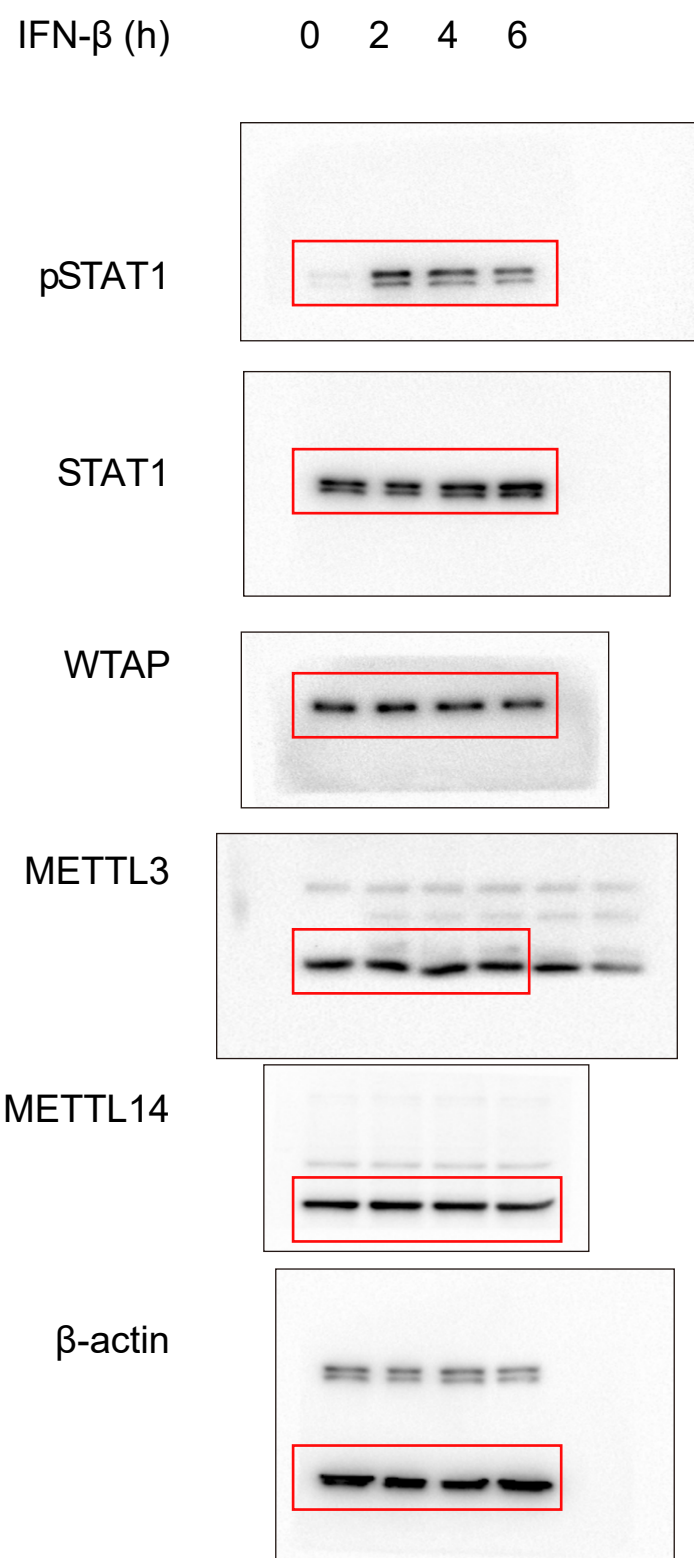

Figure 5-figure supplement 1A, source data 1: Original membranes corresponding to Figure 5-figure supplement 1A.
