# Supplementary material for: Phase transition of WTAP regulates m6A modification of interferon-stimulated genes
Source: eLife. 2025 May 27;13:RP100601. doi: 10.7554/eLife.100601 (PMC12113268; doi:10.7554/eLife.100601)
Supplement: Figure 1—figure supplement 1—source data 1. [file elife-100601-fig1-figsupp1-data1.xlsx]

## Sheet: a
HSV	-	+	+
hex	-	-	+
	3	12	2
	5	13	1
	4	15	2
	6	17	3
	4	10	1
	8	11	2
	5	13	4
	7	12	0
	7	15	0
	2	16	0
	2	14	4
	7	18	0
	4	17	1
	8	13	1
	5	11	2
	5	19	3
	7	10	0
	3	16	0
	5	12	2
	2	17	0
