# Supplementary material for: Phase transition of WTAP regulates m6A modification of interferon-stimulated genes
Source: eLife. 2025 May 27;13:RP100601. doi: 10.7554/eLife.100601 (PMC12113268; doi:10.7554/eLife.100601)
Supplement: Figure 1—source data 1. [file elife-100601-fig1-data1.xlsx]

## Sheet: a
vsv	-	+	+
hex	-	-	+
	3	20	1
	3	23	1
	5	12	2
	6	18	3
	2	15	2
	3	19	1
	5	22	0
	7	15	1
	4	17	1
	6	14	2
	8	17	0
	2	23	2
	3	19	1
	6	18	2
	4	16	3
	6	21	3
	7	20	2
	4	22	1
	3	23	0
	2	12	0

## Sheet: b
UT	IFN-β
3	2
0	5
4	3
2	2
2	7
2	4
1	4
0	5
1	5
2	14
4	5
4	7
3	7
2	13
2	14
3	11
4	12
2	9
4	17
0	9
1	11
2	12
3	6
4	7
2	12
1	13
3	7
2	9
2	14
4	5
4	7
3	7
2	13
2	14
3	11
4	12
2	9
4	17
0	9
1	11
2	12
3	6
4	7
2	12
1	13
3	7
2	9
5	8
6	9
7	11
4	12
4	11
6	10
5	9
4	9
3	8
4	11
3	11
3	13
3	8
3	13
4	8
4	10
3	11
4	9
2	8
3	7
5	7
3	9
6	11
4	14
6	10
7	10
2	12
1	13
3	12
5	7
7	9
2	9
4	10

## Sheet: g
Axis [s]	UT										IFN-β
pre-bleach	1	1	1	1	1	1	1	1	1	1	1	1	1	1	1	1	1	1	1	1	1
0	0.302117	0.509612	0.42756	0.400269	0.425301	0.517219	0.461464	0.511236	0.482908	0.47652	0.49128	0.520752	0.529149	0.455718	0.526211	0.492421	0.56794	0.584847	0.464894	0.559411	0.559411
0.743	0.431616	0.6669	0.536998	0.621714	0.537877	0.675631	0.530818	0.648174	0.598481	0.572556	0.57053	0.513604	0.558298	0.517599	0.607421	0.538471	0.567022	0.691922	0.514831	0.632317	0.632317
1.487	0.418938	0.639986	0.572641	0.598655	0.540324	0.694982	0.561932	0.633427	0.57949	0.695535	0.62285	0.485013	0.563463	0.585807	0.627748	0.57756	0.53856	0.561678	0.543468	0.636172	0.636172
2.23	0.524666	0.635792	0.500853	0.636318	0.56555	0.562807	0.586269	0.744733	0.834509	0.698229	0.687021	0.616901	0.625963	0.606212	0.669605	0.631111	0.615608	0.725736	0.573367	0.654399	0.654399
2.973	0.601415	0.640336	0.485542	0.64093	0.480836	0.573303	0.585408	0.656952	0.703201	0.594496	0.612647	0.654024	0.612745	0.626196	0.684708	0.62085	0.676754	0.787101	0.637662	0.724851	0.724851
3.715	0.528741	0.683677	0.608032	0.710108	0.590399	0.540833	0.604125	0.704354	0.503527	0.690724	0.60541	0.728384	0.630602	0.667802	0.620539	0.585592	0.690709	0.782091	0.67261	0.607431	0.607431
4.458	0.567908	0.732611	0.585944	0.631706	0.664571	0.624795	0.606061	0.686447	0.749864	0.614704	0.629138	0.754208	0.653011	0.703163	0.69818	0.63918	0.637349	0.705072	0.6435	0.606379	0.606379
5.201	0.499536	0.728417	0.590713	0.711645	0.614872	0.609052	0.634486	0.602177	0.514921	0.666282	0.681101	0.701522	0.631303	0.641525	0.675963	0.64334	0.667646	0.694427	0.677737	0.808272	0.808272
5.944	0.54142	0.672143	0.538755	0.611722	0.520369	0.610364	0.649519	0.699789	0.766142	0.716705	0.649425	0.644801	0.611695	0.693268	0.664973	0.619367	0.627617	0.645585	0.659356	0.849982	0.849982
6.688	0.482103	0.782244	0.553062	0.772367	0.549548	0.676287	0.619158	0.661166	0.505155	0.701886	0.645035	0.654139	0.649247	0.63747	0.649374	0.673902	0.681418	0.782718	0.689571	0.613389	0.613389
7.431	0.444521	0.738203	0.612801	0.584051	0.54616	0.673008	0.673748	0.591643	0.59631	0.713433	0.669119	0.719161	0.680497	0.680779	0.71437	0.649271	0.576937	0.691296	0.693436	0.69646	0.69646
8.174	0.539382	0.663754	0.600502	0.354996	0.564797	0.632994	0.623084	0.579354	0.571894	0.750192	0.677305	0.72677	0.673407	0.675588	0.742141	0.692232	0.65718	0.82154	0.754181	0.73116	0.73116
8.917	0.46535	0.613422	0.575151	0.535626	0.564232	0.64185	0.658043	0.666081	0.669018	0.738838	0.693795	0.763546	0.691089	0.6588	0.676199	0.662246	0.665993	0.793363	0.697618	0.644935	0.644935
9.66	0.569946	0.695561	0.621084	0.638624	0.617884	0.670056	0.663637	0.701896	0.612588	0.706505	0.756555	0.638806	0.659664	0.759448	0.686599	0.723948	0.615865	0.762054	0.626854	0.635121	0.635121
10.402	0.463086	0.718979	0.622841	0.552537	0.597364	0.618596	0.637202	0.533006	0.603907	0.687067	0.671017	0.8092	0.779587	0.693755	0.70078	0.654461	0.665626	0.815279	0.702035	0.673326	0.673326
11.145	0.539156	0.706047	0.669528	0.509493	0.630497	0.62286	0.654036	0.540871	0.689474	0.707275	0.717286	0.707171	0.716036	0.715734	0.772512	0.702488	0.705105	0.609894	0.694856	0.801963	0.801963
11.888	0.613867	0.691367	0.617821	0.56176	0.531852	0.608757	0.667724	0.601545	0.614759	0.695227	0.682999	0.736338	0.675158	0.749067	0.752304	0.675879	0.681234	0.879148	0.736352	0.736418	0.736418
12.631	0.597793	0.668298	0.527209	0.697809	0.550678	0.620892	0.655542	0.564677	0.704829	0.663087	0.668169	0.764123	0.721376	0.727332	0.769794	0.686094	0.653691	0.733876	0.739429	0.678233	0.678233
13.374	0.574474	0.645578	0.70492	0.463374	0.526958	0.655953	0.674152	0.54052	0.649485	0.66963	0.731641	0.709707	0.687062	0.681752	0.698535	0.704383	0.675358	0.748278	0.749211	0.759902	0.759902
14.117	0.49297	0.691367	0.606526	0.588663	0.586634	0.626435	0.672941	0.581952	0.756375	0.673018	0.657017	0.771847	0.710347	0.755556	0.702198	0.727449	0.659567	0.897307	0.798044	0.73116	0.73116
14.86	0.577417	0.686473	0.63012	0.653228	0.557643	0.594949	0.630802	0.619803	0.791101	0.785027	0.695812	0.834678	0.693803	0.710787	0.707043	0.696186	0.648182	0.746399	0.768933	0.798808	0.798808
15.604	0.611829	0.738553	0.648695	0.566372	0.531476	0.694326	0.669822	0.639396	0.7363	0.766936	0.692609	0.895896	0.713235	0.712409	0.691326	0.714103	0.713184	0.710708	0.754023	0.699264	0.699264
16.347	0.562475	0.679483	0.69262	0.678593	0.541077	0.572975	0.672699	0.67809	0.870863	0.642802	0.697473	0.871685	0.738883	0.743552	0.734342	0.687371	0.739625	0.756418	0.743452	0.775324	0.775324
17.089	0.505875	0.771059	0.633384	0.645542	0.546348	0.729419	0.671113	0.608919	0.743896	0.65358	0.709218	0.829952	0.768382	0.745985	0.719688	0.736263	0.702167	0.839073	0.747002	0.727305	0.727305
17.832	0.579228	0.738203	0.707932	0.537164	0.603953	0.676615	0.677244	0.693469	0.606077	0.699962	0.752284	0.875605	0.701856	0.789376	0.787521	0.704135	0.79372	0.768942	0.748107	0.726253	0.726253
18.575	0.633111	0.76267	0.611295	0.64093	0.565173	0.686127	0.68351	0.778441	0.760174	0.673095	0.663305	0.814157	0.669293	0.774371	0.775703	0.728932	0.819978	0.9067	0.818397	0.812128	0.812128
19.318	0.595076	0.68857	0.56511	0.637087	0.601318	0.579862	0.664013	0.676615	0.595768	0.635951	0.76391	0.80136	0.754289	0.733901	0.758568	0.701376	0.807565	0.868503	0.741007	0.714686	0.714686
20.061	0.577643	0.647955	0.520934	0.596349	0.582116	0.78124	0.649088	0.727879	0.798155	0.707275	0.740183	0.85324	0.751576	0.75223	0.806429	0.745778	0.837165	0.673763	0.77059	0.720995	0.720995
20.804	0.591453	0.671444	0.577912	0.665527	0.526581	0.600525	0.646265	0.751053	0.721649	0.772517	0.715625	0.778649	0.746148	0.765856	0.655991	0.734863	0.828057	0.767689	0.815636	0.825096	0.825096
21.547	0.552739	0.674939	0.656225	0.656303	0.500038	0.635618	0.657021	0.695225	0.718394	0.736166	0.685965	0.818653	0.752889	0.732279	0.692508	0.787289	0.822732	0.887915	0.797176	0.773572	0.773572
22.289	0.571304	0.668997	0.621837	0.739316	0.524134	0.700558	0.674958	0.653862	0.691264	0.745574	0.733658	0.749827	0.722777	0.746148	0.783266	0.720982	0.883805	0.894803	0.851215	0.806519	0.806519
23.034	0.489574	0.609892	0.706175	0.611722	0.615813	0.679239	0.605292	0.605407	0.66739	0.734026	0.704947	0.782799	0.709034	0.786212	0.763886	0.772963	0.810613	0.773951	0.802856	0.949176	0.949176
23.777	0.612735	0.681929	0.669528	0.418793	0.622026	0.623155	0.63318	0.672402	0.604449	0.768861	0.785384	0.794904	0.792892	0.772344	0.806429	0.717522	0.768087	0.777082	0.824314	0.624255	0.624255
24.519	0.428221	0.682244	0.498594	0.640161	0.559337	0.618563	0.612891	0.696278	0.63809	0.639145	0.701151	0.770809	0.824615	0.761638	0.75774	0.69046	0.673889	0.738885	0.812165	0.867157	0.867157
25.262	0.618395	0.615869	0.679066	0.661683	0.604895	0.650082	0.612354	0.729284	0.676072	0.698614	0.684897	0.774499	0.815651	0.789294	0.741432	0.700428	0.717591	0.837195	0.774771	0.804066	0.804066
26.005	0.544589	0.619609	0.590211	0.588663	0.578539	0.648409	0.63918	0.681882	0.666848	0.692841	0.759639	0.820152	0.792717	0.724331	0.746159	0.760277	0.742012	0.7201	0.788498	0.716789	0.716789
26.748	0.555456	0.536071	0.680823	0.609416	0.58061	0.637586	0.665761	0.782303	0.756918	0.705735	0.718709	0.836408	0.785924	0.754663	0.712597	0.701211	0.744767	0.742642	0.795361	0.723098	0.723098
27.491	0.613414	0.639602	0.541767	0.744696	0.578916	0.683831	0.694536	0.745787	0.608247	0.752887	0.745759	0.837445	0.718575	0.804542	0.725715	0.755458	0.753581	0.776456	0.8642	0.781739	0.781739
28.234	0.486405	0.648375	0.600502	0.70319	0.540889	0.612004	0.662427	0.772472	0.735214	0.724596	0.813845	0.802744	0.764531	0.882806	0.790381	0.811591	0.791039	0.835942	0.797097	0.829408	0.829408
28.976	0.607075	0.672143	0.565612	0.581745	0.668712	0.697934	0.660571	0.618118	0.769398	0.729215	0.772927	0.892437	0.776348	0.812976	0.816946	0.831238	0.694271	0.713212	0.84716	0.822397	0.822397
29.719	0.516742	0.717581	0.581175	0.572521	0.676468	0.620203	0.684075	0.705407	0.626153	0.740377	0.724522	0.792714	0.752976	0.815815	0.782557	0.817646	0.742931	0.897307	0.79331	0.880231	0.880231
30.462	0.56089	0.781894	0.569378	0.591583	0.692846	0.651722	0.668128	0.632795	0.674444	0.654811	0.784779	0.824187	0.76138	0.766748	0.794426	0.855499	0.770107	0.877082	0.843802	0.87953	0.87953
30.462

## Sheet: h
	WT							NTD							CTD
pre-bleach	1	1	1	1	1	1		1	1	1	1	1	1		1	1	1	1	1	1
0	0.236961	0.266667	0.260417	0.19287	0.252418	0.22902		0.1319	0.18043	0.215338	0.191087	0.210274	0.183793		0.231765	0.274208	0.321569	0.3	0.229521	0.238627
1.298	0.339706	0.338039	0.351225	0.307665	0.33085	0.328627		0.155838	0.222851	0.251397	0.238503	0.300772	0.252297		0.313333	0.394872	0.472097	0.498475	0.332353	0.38451
2.595	0.394314	0.391373	0.417525	0.373797	0.388497	0.327059		0.164631	0.234163	0.243271	0.31016	0.352675	0.314327		0.35451	0.488084	0.509201	0.57342	0.390523	0.46902
3.893	0.423333	0.398824	0.452451	0.431373	0.411242	0.355033		0.190523	0.257919	0.271204	0.315152	0.367048	0.331245		0.423333	0.526094	0.582202	0.652723	0.432462	0.572941
5.19	0.466373	0.478039	0.520833	0.489127	0.438039	0.391895		0.226185	0.283371	0.314881	0.346168	0.347352	0.327694		0.441961	0.539668	0.658522	0.704139	0.495316	0.592745
6.488	0.49098	0.492157	0.550123	0.54082	0.490196	0.448366		0.235467	0.262443	0.305739	0.363636	0.391003	0.3467		0.466078	0.613876	0.656712	0.746623	0.547495	0.683333
7.785	0.512745	0.46549	0.592647	0.547415	0.500915	0.423791		0.248168	0.290724	0.303707	0.369697	0.433324	0.355472		0.470196	0.644344	0.67994	0.814379	0.565795	0.71098
9.083	0.539902	0.494902	0.60098	0.595722	0.53451	0.448105		0.225208	0.25509	0.304723	0.39287	0.405909	0.389515		0.481765	0.660332	0.734842	0.828976	0.607407	0.77
10.38	0.584804	0.515686	0.668137	0.654189	0.532026	0.521307		0.198828	0.309389	0.261046	0.364349	0.408837	0.411445		0.541961	0.693514	0.786124	0.801307	0.644227	0.82549
11.678	0.598235	0.528235	0.650368	0.675579	0.563922	0.491765		0.210552	0.303733	0.34129	0.403565	0.437317	0.387636		0.518824	0.679336	0.799698	0.852941	0.654466	0.838627
12.975	0.598137	0.539608	0.683824	0.711408	0.575294	0.554771		0.250611	0.2681	0.33164	0.382175	0.446633	0.426901		0.541569	0.730317	0.802112	0.87451	0.678649	0.839412
14.273	0.615588	0.549804	0.708578	0.69287	0.594248	0.54902		0.227162	0.286765	0.345353	0.432086	0.434921	0.419799		0.551765	0.712519	0.80905	0.874292	0.699782	0.836863
15.57	0.650784	0.547843	0.708946	0.730125	0.594248	0.552157		0.240352	0.292986	0.343321	0.447059	0.43572	0.404971		0.551765	0.785822	0.836199	0.869063	0.743355	0.873529
16.868	0.664314	0.537255	0.739093	0.74795	0.61268	0.578039		0.210552	0.302602	0.33418	0.432086	0.459675	0.430451		0.555882	0.742383	0.806938	0.899346	0.731699	0.894902
18.165	0.698529	0.500392	0.729412	0.763815	0.623007	0.535425		0.216414	0.318439	0.316912	0.397861	0.461272	0.395572		0.568235	0.74359	0.788235	0.896078	0.739651	0.918431
19.463	0.67098	0.501176	0.731618	0.768271	0.646667	0.603399		0.233024	0.281109	0.337227	0.419964	0.425606	0.446533		0.581765	0.786727	0.843439	0.881917	0.761765	0.945882
20.76	0.703431	0.517255	0.766422	0.821569	0.644706	0.578039		0.220811	0.300905	0.310818	0.38467	0.443439	0.398914		0.571569	0.795173	0.830468	0.906972	0.771678	0.948431
22.058	0.695588	0.569412	0.76201	0.800891	0.64915	0.589804		0.197851	0.299774	0.359066	0.42959	0.430397	0.432331		0.566078	0.786727	0.866968	0.91329	0.738889	0.941569
23.355	0.712647	0.536078	0.801225	0.772193	0.688889	0.59268		0.198339	0.29638	0.359066	0.433155	0.450093	0.421888		0.58098	0.855204	0.845551	0.902832	0.778649	0.920784
24.652	0.728235	0.54549	0.802819	0.811052	0.682745	0.610458		0.203713	0.282805	0.346369	0.423886	0.454086	0.443818		0.634118	0.834691	0.92911	0.917429	0.815033	0.925686
25.95	0.752059	0.553333	0.777696	0.822816	0.711895	0.631634		0.175867	0.312783	0.348908	0.409982	0.44823	0.417293		0.636863	0.85641	0.888084	0.922222	0.83159	0.969608
27.247	0.752255	0.553333	0.826471	0.838859	0.705098	0.632418		0.205178	0.313348	0.3484	0.411408	0.478839	0.42878		0.60549	0.830468	0.897738	0.933333	0.799673	0.971176
28.545	0.75098	0.586667	0.801103	0.841711	0.69085	0.639216		0.191011	0.305995	0.33164	0.434225	0.444237	0.436717		0.596667	0.857919	0.866063	0.910458	0.79085	0.952941
29.842	0.757059	0.565882	0.810539	0.81836	0.713464	0.61098		0.190034	0.315045	0.356526	0.474153	0.438116	0.426692		0.61549	0.878431	0.861237	0.949673	0.81329	0.983529
31.14	0.77951	0.575686	0.811397	0.877718	0.73098	0.621176		0.187592	0.323529	0.326562	0.443137	0.459675	0.431704		0.623725	0.835596	0.899246	0.940305	0.847277	0.976471
32.437	0.787255	0.565882	0.823407	0.857041	0.688627	0.637908		0.187592	0.298643	0.388014	0.39893	0.491616	0.41792		0.628039	0.865762	0.895324	0.966449	0.834096	0.974706
33.735	0.801961	0.577255	0.813603	0.871836	0.696471	0.688366		0.185638	0.343326	0.359573	0.427451	0.445568	0.431704		0.579216	0.85641	0.93997	0.936166	0.873965	0.972745
35.032	0.802843	0.615686	0.825123	0.882353	0.711895	0.665882		0.17147	0.313348	0.358558	0.457754	0.47325	0.419591		0.591569	0.868477	0.917949	0.957952	0.855447	0.987843
36.33	0.796373	0.578824	0.815196	0.871836	0.720392	0.654379		0.17831	0.313914	0.406298	0.442781	0.464999	0.438388		0.59	0.867572	0.897738	0.956209	0.822767	0.955882
37.627	0.813725	0.587843	0.825123	0.87451	0.697255	0.665621		0.172447	0.356335	0.353479	0.451693	0.454352	0.447995		0.573922	0.886275	0.904977	0.927451	0.855447	0.977059
38.925	0.797353	0.575686	0.840441	0.894296	0.731503	0.644706		0.188569	0.326923	0.378365	0.419251	0.483364	0.422306		0.596863	0.901056	0.899548	0.949673	0.86732	0.970196
40.222	0.814412	0.541176	0.848284	0.895722	0.717124	0.660392		0.167562	0.370475	0.344337	0.43672	0.453287	0.43609		0.567255	0.898643	0.951735	0.955556	0.869172	0.988824
41.52	0.822353	0.558431	0.859926	0.893048	0.714248	0.660654		0.169028	0.378959	0.412392	0.424599	0.474847	0.43797		0.62549	0.887179	0.947511	0.960784	0.863072	0.964314
42.817	0.828137	0.623529	0.853064	0.879323	0.745752	0.657255		0.180752	0.343891	0.388522	0.402496	0.465797	0.420008		0.576471	0.904977	0.95264	0.962963	0.872658	0.964118
44.115	0.826667	0.600392	0.823897	0.87451	0.714641	0.64915		0.16512	0.369344	0.361605	0.46025	0.443439	0.42335		0.577255	0.914932	0.955053	0.935294	0.894771	0.963333
45.412	0.834706	0.588627	0.836152	0.903743	0.741307	0.691503		0.172936	0.386878	0.377857	0.434225	0.473516	0.430451		0.54098	0.915837	0.916139	0.948584	0.895207	0.981961
46.71	0.842647	0.61098	0.848652	0.886988	0.757516	0.634248		0.186126	0.357466	0.379888	0.470945	0.472451	0.420426		0.597255	0.877225	0.92006	0.948366	0.895752	0.977843
48.007	0.82549	0.597647	0.846324	0.895722	0.731503	0.685752		0.146067	0.388009	0.394109	0.439572	0.49481	0.419173		0.553725	0.868778	0.930618	0.939216	0.89902	0.970392
49.305	0.838333	0.573725	0.820343	0.914617	0.769673	0.655425		0.160234	0.374434	0.399695	0.474866	0.481767	0.438388		0.595098	0.928205	0.952941	0.978214	0.901961	0.979608
50.602	0.830392	0.617647	0.845833	0.905882	0.730588	0.649412		0.148999	0.342195	0.347384	0.438859	0.484695	0.447786		0.567255	0.954449	0.965008	0.960784	0.929956	0.986863
51.9	0.842353	0.624314	0.850245	0.894118	0.783529	0.653595		0.161212	0.347285	0.35094	0.486631	0.475645	0.430869		0.575686	0.902262	0.933333	0.974946	0.915251	0.989804
53.197	0.841569	0.610196	0.835172	0.884314	0.774248	0.678431		0.125061	0.363688	0.343321	0.492692	0.465265	0.435464		0.592353	0.906486	0.940573	0.961438	0.912854	0.994118
54.494	0.849804	0.599608	0.856863	0.883066	0.76732	0.639739		0.175867	0.38009	0.37227	0.438503	0.450625	0.447368		0.569608	0.933937	0.963801	0.976906	0.938126	0.988627
55.792	0.845098	0.607059	0.841912	0.915686	0.752549	0.657255		0.140694	0.408371	0.370747	0.448485	0.490285	0.441103		0.547647	0.947813	0.898643	0.983224	0.936166	0.977255
57.089	0.853039	0.594902	0.847304	0.857576	0.754771	0.673203		0.149976	0.344457	0.35551	0.477718	0.510248	0.44716		0.594314	0.950226	0.943891	0.964706	0.942484	0.991569
58.387	0.855686	0.650588	0.85576	0.925312	0.731373	0.664837		0.157792	0.41629	0.37227	0.499465	0.476976	0.426065		0.552941	0.930618	0.928205	0.965577	0.930392	0.96549
59.684	0.868333	0.60549	0.861029	0.91016	0.788497	0.71268		0.15193	0.307127	0.375317	0.472727	0.47671	0.438805		0.572745	0.93997	0.946305	0.973638	0.944662	0.967843
60.982	0.837549	0.621569	0.870588	0.907843	0.765098	0.632157		0.144602	0.365385	0.393601	0.475579	0.486026	0.449875		0.565882	0.952036	0.941176	0.965577	0.939978	0.985098
62.279	0.871569	0.59098	0.867892	0.907308	0.737516	0.677647		0.141671	0.356335	0.379888	0.459893	0.450892	0.444862		0.569608	0.952338	0.95083	0.935512	0.945425	0.980392
63.577	0.860882	0.621176	0.868137	0.914439	0.746013	0.698301		0.125061	0.379525	0.368207	0.460963	0.469524	0.421888		0.6	0.959276	0.943288	0.962527	0.944444	0.998235
64.874	0.884804	0.605882	0.861765	0.917647	0.75268	0.674248		0.146067	0.364819	0.376841	0.472727	0.469257	0.416458		0.597255	0.958974	0.962293	0.970806	0.943573	0.986667
66.172	0.883333	0.624706	0.875123	0.898039	0.760654	0.722353		0.150464	0.406109	0.415439	0.443494	0.458611	0.43985		0.576863	0.974661	0.946908	0.966667	0.939978	0.983725
67.469	0.871275	0.610588	0.874877	0.91426	0.768366	0.72		0.124084	0.373869	0.421534	0.476649	0.487623	0.424812		0.608431	0.945701	0.963801	0.963834	0.958824	0.976471
68.767	0.873137	0.604314	0.859436	0.895009	0.763529	0.710327		0.111383	0.397624	0.409853	0.488414	0.475912	0.419591		0.631373	0.964103	0.9819	0.954031	0.944009	0.995294
70.064	0.872941	0.62549	0.882108	0.93262	0.77634	0.682876		0.130923	0.372738	0.418487	0.472371	0.45728	0.403718		0.610588	0.961388	0.942081	0.968627	0.959477	0.988627
71.362	0.876275	0.645882	0.877696	0.897148	0.796601	0.706928		0.109917	0.388009	0.371762	0.486275	0.459675	0.423141		0.603725	0.983409	0.971041	0.979303	0.96732	0.987647
72.659	0.886275	0.612157	0.878554	0.895365	0.775033	0.745882		0.144113	0.438348	0.409853	0.440285	0.463668	0.405597		0.635686	0.980392	0.966817	0.966667	0.973203	0.991961
73.957	0.888039	0.636471	0.88223	0.932799	0.74183	0.738562		0.121641	0.387443	0.413408	0.431016	0.481767	0.44152		0.626275	0.977979	0.946606	0.968627	0.964052	0.994706
75.254	0.883627	0.64	0.890564	0.93066	0.774902	0.728105		0.126527	0.363122	0.409853	0.475936	0.483897	0.414996		0.683333	0.966214	0.934842	0.974292	0.968301	0.997647
76.552	0.896765	0.619216	0.878186	0.924599	0.760131	0.733856		0.129458	0.404977	0.404774	0.466667	0.449028	0.447786		0.644118	0.976471	0.958673	0.962092	0.964052	0.993137
77.849	0.879804	0.583137	0.876471	0.924242	0.730458	0.69281		0.140694	0.407805	0.382936	0.478075	0.475912	0.455723		0.655098	0.947813	0.964103	0.981917	0.962527	0.991373
79.147	0.87402	0.623529	0.89375	0.932442	0.768627	0.705882		0.130435	0.403281	0.378365	0.43779	0.453553	0.416458		0.666275	0.953846	0.966516	0.975599	0.962963	0.991765
80.444	0.903529	0.634902	0.885049	0.928164	0.758431	0.678954		0.138251	0.3931	0.412392	0.508734	0.482566	0.429825		0.66902	0.98371	0.9454	0.979085	0.964815	0.989804
81.742	0.885588	0.610196	0.888358	0.935651	0.742092	0.75634		0.127015	0.385181	0.400203	0.522282	0.479372	0.438596		0.668824	0.989442	0.977376	0.983442	0.982898	0.993725
83.039	0.897549	0.564706	0.859804	0.916221	0.779346	0.724444		0.124573	0.420249	0.397664	0.512656	0.450625	0.420844		0.674118	0.969834	0.977677	0.985185	0.967865	0.996471
84.336	0.872843	0.608235	0.883211	0.895187	0.75634	0.737778		0.12555	0.398756	0.386491	0.508021	0.476444	0.42147		0.676667	0.962896	0.975264	0.971242	0.980501	0.988235
85.634	0.895196	0.606667	0.881005	0.907843	0.775686	0.770719		0.118222	0.432692	0.414931	0.518004	0.478573	0.423141		0.678431	0.954148	0.956259	0.986275	0.975163	0.991961
86.931	0.914118	0.58902	0.880147	0.930303	0.770065	0.747451		0.12213	0.41233	0.433215	0.486275	0.492414	0.417711		0.720784	0.977677	0.959276	0.977778	0.972004	0.998627
88.229	0.91402	0.607059	0.892647	0.929768	0.765229	0.753464		0.134343	0.416855	0.375317	0.484848	0.49827	0.421261		0.695098	0.966516	0.961388	0.985621	0.973747	0.991176
89.526	0.902353	0.58549	0.870588	0.914439	0.795948	0.747712		0.142648	0.431561	0.442864	0.453476	0.477775	0.428154		0.664706	0.990347	0.946305	0.986928	0.978214	0.989804
90.824	0.869902	0.621569	0.877574	0.92852	0.774248	0.745882		0.131412	0.440611	0.39614	0.441355	0.480703	0.416249		0.681569	0.984917	0.978582	0.980174	0.983442	0.992941
92.121	0.917451	0.610196	0.881373	0.936542	0.803268	0.716863		0.13532	0.428167	0.427628	0.455615	0.500133	0.404344		0.665686	0.962293	0.974962	0.987582	0.974183	0.994118
93.419	0.917941	0.549804	0.892525	0.938146	0.777647	0.734902		0.121641	0.421946	0.411884	0.473797	0.474581	0.427527		0.683333	0.978884	0.98009	0.985403	0.968736	0.996667
94.716	0.899118	0.607059	0.910294	0.936364	0.776078	0.757386		0.135809	0.3931	0.442864	0.494831	0.469257	0.426692		0.654902	0.988537	0.964706	0.974292	0.97549	0.997451
96.014	0.912059	0.643137	0.896324	0.92959	0.772941	0.782484		0.124573	0.468326	0.428644	0.475579	0.482034	0.427945		0.661765	0.973756	0.982504	0.963834	0.984314	0.99
97.311	0.928725	0.624706	0.893873	0.927629	0.782092	0.764444		0.116268	0.401018	0.42255	0.443137	0.462869	0.430869		0.65902	0.987632	0.996078	0.983224	0.966558	0.999216
98.609	0.900196	0.649804	0.898039	0.91533	0.761046	0.758954		0.142159	0.42138	0.38903	0.492335	0.461805	0.444653		0.685686	0.991855	0.984012	0.995425	0.970915	0.990196
99.906	0.908627	0.608627	0.888358	0.924599	0.732549	0.769412		0.141671	0.445701	0.409345	0.448485	0.476178	0.403091		0.690196	0.969834	0.982805	0.971678	0.980174	0.996275
101.204	0.904118	0.580392	0.879534	0.942068	0.737516	0.765229		0.141182	0.464932	0.430168	0.473797	0.480437	0.406642		0.664118	0.999698	0.988839	0.973856	0.973965	1
102.501	0.917059	0.622353	0.881005	0.935472	0.757124	0.748235		0.152418	0.482466	0.416963	0.462032	0.481501	0.390351		0.684314	0.972549	0.98371	0.993682	0.982898	0.996863
103.799	0.907059	0.632549	0.894485	0.954724	0.74183	0.703268		0.122618	0.468326	0.410361	0.45098	0.474048	0.419799		0.686275	0.986425	0.986425	0.979739	0.972767	0.998431
105.096	0.92049	0.618431	0.902206	0.929055	0.744706	0.720523		0.15193	0.478507	0.405282	0.464884	0.493213	0.420844		0.650588	0.997587	0.978281	0.985621	0.978649	0.997843
106.394	0.899804	0.645882	0.904044	0.931194	0.770458	0.677647		0.127015	0.43948	0.416455	0.503387	0.49481	0.415205		0.665686	0.995475	0.986124	0.988671	0.978758	1
107.691	0.913039	0.610588	0.898897	0.918182	0.745359	0.683137		0.142159	0.43043	0.470797	0.491266	0.494011	0.382206		0.690196	0.976772	0.977979	0.991503	0.973094	0.99902
108.989	0.906275	0.586667	0.918627	0.937255	0.752941	0.750588		0.164631	0.445701	0.412392	0.476649	0.444237	0.383668		0.683922	0.999698	0.959276	0.990196	0.975272	0.996863
110.286	0.910588	0.607843	0.892034	0.941711	0.74719	0.703529		0.15193	0.494344	0.436262	0.464171	0.454618	0.392231		0.667255	0.985822	0.998492	0.956209	0.985512	1
111.584	0.907647	0.584706	0.902083	0.927629	0.730196	0.75817		0.140205	0.43043	0.39614	0.506952	0.473782	0.376775		0.706275	0.983409	0.988839	0.978214	0.966013	0.998627
112.881	0.909706	0.60549	0.896078	0.91533	0.736078	0.754248		0.156326	0.482466	0.412392	0.48164	0.501996	0.393066		0.707843	0.988235	0.99638	0.98976	0.97146	1
114.179	0.91049	0.601176	0.9	0.934581	0.735948	0.747451		0.139228	0.433824	0.399695	0.472727	0.473782	0.373225		0.678235	0.976169	0.997888	0.981699	0.988017	0.99902
115.476	0.896569	0.625098	0.906005	0.939394	0.727451	0.732288		0.144602	0.486425	0.417979	0.461676	0.509981	0.377611		0.690784	0.993665	0.986425	0.972113	0.97658	0.996863
116.773	0.912353	0.607451	0.889461	0.899643	0.762614	0.729673		0.124573	0.442873	0.448959	0.469162	0.484961	0.390769		0.67549	0.99276	0.974057	0.988017	0.985076	0.99902
118.071	0.917157	0.656078	0.924632	0.923173	0.752418	0.742745		0.134343	0.451357	0.426105	0.467023	0.472185	0.404971		0.670196	0.99276	0.98009	0.99085	0.979521	0.999804
119.368	0.908529	0.629412	0.889338	0.914973	0.745359	0.786667		0.151441	0.437217	0.43677	0.521212	0.496673	0.387427		0.646275	0.996682	0.983107	0.967756	0.98976	1
120.666	0.912549	0.652941	0.901225	0.915865	0.771111	0.747451		0.157303	0.502828	0.448451	0.462745	0.493745	0.371345		0.670196	0.99819	1	0.984532	0.98671	1
121.963	0.91098	0.595686	0.912623	0.939572	0.762876	0.777778		0.152907	0.456448	0.457085	0.514439	0.500133	0.35944		0.691176	0.9819	0.990649	0.995207	0.970044	0.997451
123.261	0.913627	0.632157	0.87549	0.929947	0.786536	0.753725		0.140205	0.463801	0.44388	0.468806	0.490019	0.402673		0.70098	0.988537	0.990649	0.960784	0.97854	1
124.558	0.908824	0.623922	0.931373	0.921747	0.722222	0.797124		0.150953	0.481335	0.459116	0.474153	0.479106	0.379073		0.696471	0.997285	0.99095	1	0.984423	0.99451
125.856	0.919314	0.587451	0.871814	0.921569	0.752026	0.74902		0.137763	0.456448	0.408329	0.508378	0.515039	0.381997		0.664902	1	1	0.991503	0.988453	0.997059
127.153	0.916471	0.632157	0.892279	0.925847	0.75268	0.810196		0.133366	0.506787	0.447943	0.501248	0.491616	0.36675		0.688431	0.976169	0.987632	0.984532	0.968845	1
128.451	0.911961	0.615294	0.911642	0.917469	0.73634	0.799477		0.134343	0.418552	0.438801	0.493405	0.512643	0.362573		0.703333	0.995173	0.994872	0.986275	0.973965	0.996471
129.748	0.931961	0.679608	0.876471	0.907665	0.729281	0.79268		0.121641	0.49491	0.42966	0.485205	0.474847	0.400794		0.733333	0.988839	0.974057	0.988453	0.988017	0.999216
131.046	0.926176	0.64	0.917279	0.92246	0.754641	0.762353		0.136786	0.510181	0.44388	0.516221	0.510248	0.378864		0.717647	0.995173	0.998793	0.983878	0.973312	0.998235
132.343	0.917941	0.635686	0.920343	0.929412	0.739869	0.801307		0.156815	0.4819	0.472321	0.482709	0.496673	0.375313		0.714706	0.999397	0.993967	0.994118	0.976144	0.997059
133.641	0.916078	0.657255	0.89902	0.913012	0.733464	0.795033		0.142159	0.513009	0.425089	0.513725	0.50732	0.338972		0.722941	0.997888	0.995777	0.992593	0.972222	0.998824
134.938	0.911765	0.595294	0.910172	0.934581	0.729935	0.810719		0.14851	0.50905	0.414931	0.500178	0.511312	0.395155		0.703922	0.979186	0.98371	0.985621	0.989651	0.998824
136.236	0.925882	0.586275	0.895343	0.907665	0.759216	0.784575		0.134831	0.496041	0.451498	0.493761	0.490285	0.365288		0.71098	0.994872	0.999397	0.982789	0.984967	1
137.533	0.907549	0.616471	0.908088	0.940642	0.715556	0.739608		0.142159	0.455317	0.458101	0.515865	0.491616	0.345238		0.66451	0.995777	0.993967	0.988017	0.973312	1
138.831	0.934216	0.623137	0.905392	0.916221	0.750327	0.806536		0.146556	0.536765	0.436262	0.461676	0.519297	0.375522		0.748039	0.988839	0.990045	0.997603	0.983442	1
140.128	0.923922	0.623137	0.917402	0.912478	0.754641	0.802614		0.131412	0.51414	0.4774	0.504456	0.517434	0.343985		0.742353	1	0.986425	0.997821	0.984749	0.997255
141.426	0.923922	0.616078	0.905515	0.92656	0.764444	0.829542		0.130923	0.496606	0.433215	0.473797	0.504924	0.352757		0.653922	0.998793	0.98914	0.99281	0.984423	0.997451
142.723	0.94098	0.630588	0.919608	0.896613	0.745621	0.793203		0.139717	0.511312	0.442864	0.544029	0.527282	0.389515		0.688824	0.988537	0.980694	0.982135	0.988126	0.997843
144.021	0.917059	0.598431	0.922549	0.921212	0.760523	0.795556		0.130923	0.475679	0.464195	0.478788	0.509449	0.345656		0.70549	1	0.979789	0.989978	0.982462	1
145.318	0.895	0.598039	0.917402	0.918004	0.748235	0.777778		0.132877	0.471719	0.430168	0.483066	0.511312	0.356516		0.684902	0.989442	1	0.992593	0.981808	1
146.615	0.923431	0.622745	0.909436	0.909091	0.750327	0.839739		0.168051	0.530543	0.426612	0.506595	0.549641	0.376149		0.705098	0.995475	0.997587	0.977778	0.980501	1
147.913	0.917353	0.592157	0.911642	0.91016	0.760915	0.780915		0.121153	0.554299	0.429152	0.502317	0.511046	0.360693		0.708039	0.98371	1	0.99085	0.972658	1
149.21	0.91549	0.602745	0.912745	0.873975	0.723007	0.8		0.12213	0.574661	0.446927	0.506239	0.546713	0.373225		0.744902	1	0.988537	0.98976	0.989216	0.995098
150.508	0.943039	0.600784	0.915931	0.929234	0.743268	0.813595		0.136297	0.558824	0.436262	0.469519	0.5177	0.362991		0.711961	1	0.995777	0.998257	0.975926	1
151.805	0.919118	0.611765	0.920833	0.909804	0.72902	0.812026		0.133854	0.52319	0.435754	0.458467	0.523822	0.369674		0.708824	0.985822	0.991554	0.991721	0.979739	0.996275
153.103	0.924412	0.58549	0.916054	0.9041	0.734902	0.783007		0.144113	0.540724	0.470289	0.479144	0.539792	0.375313		0.719412	0.990649	0.991554	0.994771	0.96939	1
154.4	0.916961	0.65451	0.902696	0.904813	0.705359	0.786144		0.12213	0.522624	0.433723	0.477005	0.542986	0.371136		0.72451	0.995173	0.999698	0.992593	0.978867	0.998824
155.698	0.937549	0.617647	0.902696	0.920321	0.721569	0.785882		0.139717	0.539593	0.430675	0.500891	0.529944	0.366332		0.715882	0.995475	0.999397	0.997603	0.987255	1
156.995	0.936373	0.640392	0.920956	0.909091	0.757255	0.800261		0.130435	0.575226	0.4129	0.491979	0.525153	0.361529		0.700392	0.993363	0.99276	1	0.98671	0.999412
158.293	0.931078	0.590196	0.89424	0.898039	0.735948	0.828235		0.136297	0.552036	0.470289	0.485561	0.524621	0.358814		0.74	0.999397	1	1	0.989107	1
159.59	0.927059	0.621176	0.902206	0.914617	0.734248	0.768105		0.113825	0.476244	0.455053	0.540107	0.525419	0.335004		0.727451	0.999698	1	0.995207	0.98268	1
160.888	0.929706	0.609804	0.910172	0.917112	0.731373	0.774118		0.129458	0.506787	0.494667	0.530838	0.51983	0.369048		0.753529	0.985219	0.997587	0.988453	0.98976	1
162.185	0.949216	0.59451	0.916054	0.921034	0.723922	0.791634		0.132389	0.499434	0.470289	0.489483	0.523556	0.34127		0.734706	0.99457	1	0.994553	0.969717	0.999216
163.483	0.954902	0.635294	0.912745	0.912121	0.722745	0.812549		0.143136	0.536765	0.445404	0.486988	0.506787	0.356725		0.751961	1	1	0.993028	0.977778	1
164.78	0.920882	0.610588	0.899755	0.927273	0.747451	0.776209		0.111383	0.515271	0.431183	0.506595	0.531275	0.31934		0.772549	0.995173	0.99819	0.999564	0.993791	1
166.078	0.916471	0.583529	0.92451	0.923886	0.759085	0.824314		0.135809	0.527149	0.477908	0.486988	0.499601	0.366332		0.774118	0.98914	0.990347	0.998257	0.990959	1
167.375	0.925588	0.616471	0.915809	0.907308	0.761699	0.786667		0.127015	0.513009	0.466227	0.472371	0.500665	0.346282		0.763333	1	0.999397	0.987146	0.98671	1
168.673	0.936176	0.563922	0.915441	0.925847	0.752941	0.76366		0.123107	0.506222	0.48451	0.491266	0.515837	0.356516		0.797843	0.998793	1	0.993682	0.980501	1
169.97	0.947059	0.63098	0.922917	0.945276	0.72732	0.804706		0.12213	0.656674	0.456069	0.542602	0.51424	0.336675		0.802353	1	1	1	0.987037	1
171.268	0.929216	0.594902	0.904657	0.905526	0.767974	0.8		0.112848	0.533371	0.42255	0.483066	0.544583	0.362991		0.771569	1	1	0.998257	0.980065	0.997255
172.565	0.930882	0.631765	0.926103	0.948663	0.736993	0.793725		0.128481	0.529977	0.42255	0.534759	0.540591	0.340226		0.782745	1	1	0.995643	0.982244	0.998431
173.863	0.925294	0.614118	0.918137	0.910517	0.757516	0.825621		0.160234	0.577489	0.480955	0.558289	0.558424	0.331871		0.769216	1	1	0.99695	0.981699	1
175.16	0.924706	0.622745	0.931127	0.912478	0.769542	0.765229		0.1319	0.518665	0.454038	0.508378	0.543253	0.342523		0.806471	1	1	0.996514	0.980828	1
176.457	0.928627	0.581961	0.910784	0.898396	0.726013	0.817516		0.128969	0.598982	0.441341	0.498396	0.570668	0.370927		0.820392	1	1	0.999129	0.987908	1
177.755	0.921471	0.614902	0.910417	0.907308	0.723268	0.82902		0.110405	0.553167	0.437786	0.509804	0.532606	0.364453		0.806863	1	1	0.997821	0.985839	1
179.052	0.930294	0.625098	0.916422	0.900535	0.739346	0.76732		0.113825	0.511878	0.470797	0.492335	0.510248	0.317669		0.850588	1	1	0.991503	0.986601	0.998627
180.35	0.938137	0.59451	0.923407	0.926203	0.749542	0.78719		0.101612	0.553733	0.471813	0.537968	0.554964	0.36675		0.820392	1	1	1	0.980174	0.997843
181.647	0.928824	0.613333	0.916422	0.916578	0.737124	0.746928		0.14851	0.571267	0.440325	0.538324	0.532073	0.328947		0.826667	0.99638	0.999698	0.984749	0.990959	0.999608
182.945	0.939216	0.646667	0.918627	0.92139	0.721438	0.785882		0.120176	0.598982	0.43677	0.554011	0.518233	0.307018		0.844902	1	0.998492	0.997386	0.98159	1
184.242	0.931863	0.556471	0.927819	0.926203	0.756209	0.773333		0.119687	0.554864	0.440325	0.526203	0.567474	0.337928		0.813333	1	0.997888	0.999782	0.98061	1
185.54	0.919118	0.613725	0.897672	0.920143	0.738301	0.771765		0.104055	0.562217	0.499238	0.536898	0.546713	0.333751		0.826275	1	0.999397	1	0.983878	1
186.837	0.924118	0.623137	0.916544	0.923529	0.718693	0.778301		0.097704	0.528281	0.472829	0.521569	0.557626	0.30117		0.807843	0.998793	1	0.995425	0.98366	1
188.135	0.930392	0.625098	0.924755	0.924421	0.74732	0.746144		0.133366	0.610294	0.495683	0.530481	0.556561	0.334795		0.85549	1	0.996983	0.995207	0.98671	1
189.432	0.923529	0.618824	0.908456	0.9082	0.744314	0.79634		0.104543	0.563914	0.458608	0.512299	0.527016	0.327903		0.845882	1	1	0.993028	0.976471	1
190.73	0.935392	0.636078	0.928922	0.879501	0.762876	0.79085		0.131412	0.595023	0.479431	0.522282	0.550972	0.322055		0.812745	1	0.993967	0.994336	0.977887	1
192.027	0.938725	0.599608	0.91152	0.904456	0.748758	0.775948		0.127992	0.596154	0.461148	0.502317	0.55177	0.315581		0.839608	1	0.994268	1	0.991939	1
193.325	0.934216	0.619216	0.926593	0.9082	0.718824	0.728889		0.10894	0.559389	0.520569	0.525847	0.512643	0.357978		0.842157	1	0.993665	0.992375	0.985621	1
