# Supplementary material for: Phase transition of WTAP regulates m6A modification of interferon-stimulated genes
Source: eLife. 2025 May 27;13:RP100601. doi: 10.7554/eLife.100601 (PMC12113268; doi:10.7554/eLife.100601)
Supplement: Figure 2—figure supplement 1—source data 3. [file elife-100601-fig2-figsupp1-data3.xlsx]

## Sheet: f
NC			PPP4-KD
1.24	1.25	1.24	0.27	0.24	0.25

## Sheet: g
scr siRNA	scr siRNA	PPP4 siRNA	PPP4 siRNA
UT	IFN-β	UT	IFN-β
1	12	1	3
1	9	0	0
5	15	4	1
3	12	1	1
0	18	0	1
2	14	0	4
3	3	2	3
2	23	1	9
3	4	1	5
4	3	0	5
0	6	5	4
2	11	4	9
3	15	4	0
1	4	0	4
2	13	1	1
6	14	2	0
4	15	1	4
3	21	2	4
2	5	2	6
3	9	0	3
5	13	0	3
1	18	0	1
3	18	4	0
7	10	6	4
1	22	5	4
6	2	2	0
0	13	3	7
0	9	1	1
10	3	0	11
4	14	1	3
2	15	1	4
2	16	1	0
0	15	2	1
4	10	2	5
1	11	3	2
0	12	0	3
4	22	1	3
3	10	0	7
0	16	4	3
2	8	6	1
8	14	1	2
9	14	5	0
5	19	8	1
0	4	3	4
5	10	4	1
4	14	2	5
0	16	1	0
2	15	1	1
2	15	0	2
0	13	5	0
2	9	2	13
1	9	4	5
0	10	4	11
9	11	0	1
0	11	1	3
3	18	3	6
8	10	5	1
2	10	12	7
0	12	6	2
0	16	1	0
3	15	0	1
0	17	4	5
0	17	4	0
6	3	0	1
3	9	5	0
8	4	1	6
7	8	3	5
0	12	5	9
0	14	8	3
0	13	0	0
4	13	2	4
0	10	1	1
3	19	4	10
1	9	0	4
0	7	7	11
5	18	1	0
3	14	1	5
0	9	0	5
6	2	5	9
0	3	4	0

## Sheet: h
UT	ifnb	ifnb	ifnb
fostriecin-	fostriecin-	fostriecin 2 nM	fostriecin 5 nM
0	10	1	1
1	9	1	1
1	10	3	0
2	8	1	1
3	6	3	0
1	5	0	0
1	9	1	1
0	7	1	0
2	9	0	1
1	10	3	0
0	11	1	0
1	9	1	1
2	5	0	1
3	6	1	3
1	8	0	1
2	6	0	0
2	7	1	1
3	10	2	5
2	9	2	1
0	9	0	0
1	11	1	2
1	13	3	0
1	12	4	0
2	10	5	1
2	9	2	2
1	10	4	0
2	11	2	2
1	8	1	1
0	4	4	1
0	6	7	1
1	3	4	1
2	9	5	1
1	9	1	1
3	13	3	3
2	11	5	2
1	9	1	4
3	9	3	0
0	6	3	1
1	4	4	2
1	7	2	0
