# Supplementary material for: Phase transition of WTAP regulates m6A modification of interferon-stimulated genes
Source: eLife. 2025 May 27;13:RP100601. doi: 10.7554/eLife.100601 (PMC12113268; doi:10.7554/eLife.100601)
Supplement: Figure 2—source data 3. [file elife-100601-fig2-data3.xlsx]

## Sheet: a
IFN-β	0	1
	1	0.664842
	1	0.632293
	1	0.643613

## Sheet: c
siRNA	IgG	scr	scr	PPP4	PPP4
IFN-β		0	1	0	1
	0	1	0.547913	0.943687	0.938161
	0	1	0.420365	0.97609	0.907395
	0	1	0.626783	0.987998	1.03882

## Sheet: g
	WT						5ST-D						5ST-A
prebleach	1	1	1	1	1		1	1	1	1	1		5	5	5	5	5
0	0.402723	0.451373	0.372923	0.355882	0.388796		0.293292	0.307154	0.374372	0.303937	0.303937		1	1	1	1	1
0.742	0.482571	0.546797	0.438749	0.421569	0.436134		0.305568	0.286936	0.324749	0.334646	0.334646		0.577906	0.544203	0.282036	0.220257	0.425509
1.485	0.512745	0.577516	0.471802	0.468487	0.486835		0.337571	0.31493	0.400754	0.361417	0.361417		0.638885	0.604979	0.37906	0.305841	0.48706
2.228	0.573747	0.611634	0.51662	0.498179	0.512325		0.35993	0.332037	0.339824	0.349606	0.349606		0.680504	0.627312	0.444218	0.348587	0.529824
2.971	0.573965	0.641699	0.553595	0.492577	0.564286		0.298992	0.327372	0.31407	0.356693	0.356693		0.696536	0.648631	0.505741	0.38182	0.56248
3.714	0.615251	0.650719	0.552474	0.52437	0.560924		0.32705	0.31804	0.385678	0.344094	0.344094		0.717972	0.663994	0.554559	0.420586	0.583828
4.457	0.620806	0.66732	0.575444	0.526471	0.562325		0.308198	0.33437	0.350503	0.351969	0.351969		0.734004	0.669417	0.579461	0.441539	0.593256
5.201	0.62342	0.651765	0.576471	0.522689	0.616387		0.341955	0.316485	0.406407	0.352756	0.352756		0.746922	0.671817	0.620499	0.477384	0.612904
5.944	0.609368	0.707582	0.577778	0.546639	0.598179		0.318281	0.33126	0.373744	0.379528	0.379528		0.754885	0.685437	0.639625	0.488948	0.633051
6.687	0.620915	0.69268	0.605415	0.54972	0.603641		0.351162	0.284603	0.34799	0.389764	0.389764		0.770308	0.682344	0.663541	0.504088	0.643498
7.429	0.670915	0.713595	0.595238	0.532633	0.580952		0.330118	0.264386	0.404523	0.307087	0.307087		0.77666	0.69399	0.670132	0.523425	0.654557
8.172	0.653595	0.683791	0.631092	0.568487	0.581513		0.290224	0.229393	0.403266	0.328346	0.328346		0.77709	0.696871	0.676824	0.537601	0.66718
8.915	0.619826	0.707974	0.605882	0.564006	0.594258		0.366506	0.401244	0.443467	0.351181	0.351181		0.786412	0.704819	0.685793	0.554668	0.677242
9.658	0.647277	0.691895	0.590196	0.561064	0.601961		0.359053	0.342924	0.395101	0.345669	0.345669		0.791977	0.719275	0.69201	0.565735	0.676608
10.401	0.633333	0.732418	0.60084	0.59944	0.62465		0.310829	0.361586	0.403894	0.388976	0.388976		0.798883	0.71643	0.689122	0.576585	0.680846
11.144	0.624401	0.700131	0.63352	0.59958	0.646779		0.330557	0.321928	0.380025	0.317323	0.317323		0.804395	0.722013	0.688137	0.58016	0.684086
11.886	0.64281	0.737778	0.620448	0.583473	0.597619		0.374836	0.357698	0.38505	0.348031	0.348031		0.805844	0.725871	0.694048	0.594958	0.691996
12.629	0.622658	0.742092	0.630345	0.576751	0.618487		0.330118	0.292379	0.430276	0.351969	0.351969		0.806792	0.728218	0.703628	0.596232	0.696415
13.372	0.626144	0.713987	0.620261	0.581653	0.623249		0.303814	0.360031	0.387563	0.353543	0.353543		0.806327	0.732984	0.702405	0.601548	0.700585
14.115	0.636275	0.713987	0.644818	0.589636	0.634314		0.3516	0.341369	0.316583	0.370866	0.370866		0.806935	0.742568	0.711849	0.606118	0.702262
14.858	0.653486	0.718301	0.622689	0.593838	0.667927		0.304691	0.306376	0.349246	0.303937	0.303937		0.807562	0.7383	0.70818	0.612678	0.703463
15.602	0.648148	0.706275	0.660037	0.584314	0.614426		0.304691	0.359253	0.382538	0.331496	0.331496		0.806416	0.742532	0.715756	0.610812	0.703508
16.345	0.635948	0.715163	0.647432	0.564706	0.630392		0.313459	0.328149	0.405779	0.355906	0.355906		0.810603	0.742372	0.719765	0.621133	0.709106
17.088	0.677669	0.714641	0.619608	0.578151	0.626751		0.34327	0.307932	0.411432	0.333858	0.333858		0.808027	0.74127	0.725472	0.620045	0.708041
17.831	0.659259	0.708105	0.642951	0.584454	0.606303		0.345463	0.304821	0.383166	0.347244	0.347244		0.810317	0.747688	0.72853	0.620636	0.710262
18.574	0.662527	0.691503	0.658637	0.567647	0.611204		0.340202	0.347589	0.337312	0.316535	0.316535		0.81046	0.751511	0.727069	0.621071	0.715814
19.316	0.653595	0.74183	0.645378	0.572549	0.593697		0.336694	0.37014	0.371859	0.371654	0.371654		0.811069	0.756508	0.735018	0.620201	0.714499
20.059	0.642593	0.754379	0.626797	0.604062	0.62409		0.311705	0.319596	0.38191	0.266142	0.266142		0.81123	0.754659	0.734169	0.632139	0.718511
20.802	0.652505	0.746275	0.629972	0.595098	0.629412		0.295484	0.357698	0.365578	0.316535	0.316535		0.808957	0.754072	0.739129	0.632076	0.717332
21.545	0.638889	0.698693	0.652661	0.621709	0.631092		0.359491	0.31804	0.345477	0.279528	0.279528		0.813305	0.761735	0.745244	0.632418	0.722477
22.289	0.633224	0.702353	0.625864	0.603081	0.647199		0.283209	0.346034	0.34108	0.370079	0.370079		0.816383	0.765878	0.745108	0.635807	0.723496
23.032	0.638453	0.722484	0.614753	0.622689	0.632073		0.371328	0.377138	0.375	0.385827	0.385827		0.817689	0.765007	0.749558	0.634315	0.718148
23.775	0.619717	0.705882	0.648086	0.602941	0.647199		0.305129	0.339036	0.338568	0.293701	0.293701		0.819102	0.767532	0.746093	0.631144	0.723927
24.518	0.609913	0.738693	0.64267	0.594538	0.647479		0.356861	0.327372	0.385678	0.372441	0.372441		0.817689	0.768492	0.748098	0.633848	0.718216
25.261	0.620044	0.731242	0.638655	0.605042	0.644118		0.308198	0.356143	0.36809	0.286614	0.286614		0.818584	0.773382	0.750408	0.641123	0.728051
26.003	0.606318	0.698039	0.661438	0.597059	0.662885		0.334064	0.340591	0.413945	0.27874	0.27874		0.817295	0.777063	0.749422	0.643299	0.727485
26.746	0.624183	0.718562	0.643417	0.591317	0.645378		0.302499	0.312597	0.400126	0.326772	0.326772		0.816275	0.780637	0.752888	0.645226	0.733219
27.489	0.615359	0.740131	0.681046	0.604762	0.609384		0.349408	0.292379	0.332915	0.289764	0.289764		0.816991	0.784353	0.754824	0.647434	0.729593
28.232	0.628649	0.699216	0.687208	0.608964	0.634174		0.366944	0.357698	0.308417	0.36063	0.36063		0.815309	0.78229	0.753975	0.652066	0.726238
28.975	0.62451	0.761438	0.6831	0.62479	0.660644		0.345901	0.349145	0.358668	0.331496	0.331496		0.816562	0.7774	0.754416	0.64877	0.728482
29.718	0.619826	0.72183	0.66648	0.607983	0.637815		0.344586	0.379471	0.361809	0.380315	0.380315		0.814862	0.782077	0.753635	0.645879	0.729479
30.46	0.611002	0.749542	0.681139	0.622829	0.67535		0.314336	0.302488	0.375628	0.329921	0.329921		0.817116	0.779054	0.757712	0.650232	0.728527
31.203	0.614161	0.743529	0.665079	0.64888	0.6493		0.348093	0.283048	0.356156	0.267717	0.267717		0.818637	0.783979	0.758323	0.654118	0.73059
31.948	0.614488	0.724314	0.682633	0.636275	0.648039		0.311267	0.339036	0.33103	0.333071	0.333071		0.816114	0.784904	0.759172	0.650791	0.734352
32.69	0.621786	0.72366	0.682726	0.62563	0.622689		0.309513	0.306376	0.364322	0.313386	0.313386		0.815613	0.784851	0.761449	0.651133	0.731474
33.433	0.648584	0.724706	0.668067	0.628431	0.661625		0.365629	0.291602	0.34108	0.394488	0.394488		0.817438	0.788549	0.761007	0.652377	0.7334
34.176	0.607843	0.715817	0.677778	0.635294	0.64986		0.284963	0.330482	0.303392	0.331496	0.331496		0.818691	0.784193	0.766544	0.652998	0.734261
34.919	0.635185	0.704183	0.654715	0.581933	0.681513		0.281894	0.346812	0.364322	0.381102	0.381102		0.821697	0.786558	0.763487	0.650574	0.734216
35.662	0.643137	0.730196	0.673576	0.613025	0.677171		0.307321	0.258942	0.413945	0.316535	0.316535		0.819693	0.785633	0.762909	0.656418	0.734329
36.405	0.576253	0.732549	0.697479	0.623669	0.678151		0.298553	0.358476	0.336055	0.275591	0.275591		0.820427	0.783606	0.766748	0.653682	0.734918
37.147	0.615686	0.743791	0.668908	0.615826	0.648039		0.30776	0.279938	0.357412	0.307087	0.307087		0.819514	0.786166	0.764574	0.66077	0.734102
37.89	0.610893	0.760654	0.672269	0.623669	0.671148		0.311267	0.319596	0.307161	0.314961	0.314961		0.819049	0.785491	0.768515	0.659154	0.731134
38.633	0.62342	0.746797	0.69057	0.630252	0.67549		0.346778	0.354588	0.356784	0.359843	0.359843		0.820194	0.785046	0.764948	0.657289	0.735893
39.376	0.596732	0.732157	0.674136	0.634594	0.658263		0.301184	0.361586	0.307789	0.326772	0.326772		0.822144	0.787287	0.770519	0.653216	0.733445
40.119	0.637255	0.741569	0.709711	0.632353	0.648039		0.301184	0.336703	0.371859	0.297638	0.297638		0.822949	0.787269	0.773407	0.658719	0.735507
40.862	0.606863	0.74902	0.6662	0.637535	0.658403		0.365629	0.287714	0.322236	0.350394	0.350394		0.821303	0.788869	0.76967	0.663444	0.73519
41.606	0.598148	0.740261	0.69113	0.654482	0.628711		0.349408	0.358476	0.348618	0.297638	0.297638		0.822735	0.792016	0.769364	0.661734	0.736527
42.349	0.619826	0.731895	0.681699	0.604902	0.677731		0.34897	0.300933	0.311558	0.251181	0.251181		0.824918	0.796479	0.774392	0.663506	0.734329
43.092	0.61329	0.766144	0.692437	0.620588	0.668347		0.348093	0.325816	0.321608	0.313386	0.313386		0.824363	0.796924	0.777687	0.661174	0.741218
43.835	0.600436	0.747582	0.677965	0.638655	0.67437		0.339325	0.321928	0.379397	0.3	0.3		0.822305	0.796213	0.775173	0.661765	0.745388
44.577	0.602614	0.730458	0.665733	0.641877	0.678431		0.369575	0.355365	0.285176	0.328346	0.328346		0.82422	0.805637	0.783564	0.6682	0.739179
45.32	0.582571	0.737647	0.679365	0.634314	0.631373		0.30776	0.384914	0.303392	0.299213	0.299213		0.826081	0.801831	0.779658	0.664128	0.737388
46.063	0.600109	0.757386	0.696452	0.62619	0.651961		0.347216	0.307154	0.319724	0.298425	0.298425		0.822019	0.804036	0.775139	0.668076	0.739088
46.806	0.588562	0.758431	0.669935	0.606723	0.692437		0.306006	0.340591	0.401382	0.338583	0.338583		0.823289	0.803396	0.779386	0.669724	0.7397
47.55	0.601089	0.754248	0.679272	0.639356	0.678852		0.319597	0.248834	0.305905	0.303937	0.303937		0.82447	0.803378	0.784685	0.676563	0.743281
48.293	0.604575	0.738693	0.707563	0.617227	0.640756		0.295923	0.351477	0.349874	0.359055	0.359055		0.824417	0.805477	0.775683	0.673983	0.743485
49.036	0.627778	0.730327	0.682726	0.642017	0.665546		0.346778	0.337481	0.342965	0.290551	0.290551		0.821124	0.811807	0.77711	0.671496	0.742737
49.779	0.629521	0.760392	0.695238	0.611064	0.689076		0.306006	0.31182	0.388191	0.337008	0.337008		0.824113	0.811113	0.783327	0.670376	0.742465
50.522	0.628758	0.741046	0.6845	0.653221	0.645798		0.327926	0.323484	0.275754	0.330709	0.330709		0.823236	0.809584	0.784855	0.671029	0.74285
51.264	0.627996	0.755033	0.670121	0.6007	0.656022		0.347216	0.313375	0.319095	0.267717	0.267717		0.825222	0.813033	0.782273	0.667454	0.742487
52.007	0.628322	0.759608	0.667227	0.616106	0.672829		0.419114	0.315708	0.344849	0.301575	0.301575		0.82379	0.813905	0.780847	0.679547	0.742442
52.75	0.625054	0.750196	0.681232	0.638936	0.679692		0.324419	0.297823	0.349874	0.233858	0.233858		0.827441	0.812731	0.788185	0.676407	0.74183
53.493	0.597495	0.753464	0.686461	0.632353	0.657143		0.279702	0.281493	0.339824	0.303937	0.303937		0.822788	0.811913	0.787233	0.674014	0.74421
54.236	0.63061	0.717255	0.69113	0.606443	0.666667		0.316966	0.304821	0.268216	0.369291	0.369291		0.82762	0.811344	0.784346	0.673952	0.748901
54.979	0.626253	0.755556	0.687302	0.629552	0.679272		0.302937	0.313375	0.296482	0.320472	0.320472		0.826975	0.809851	0.786282	0.678148	0.744232
55.723	0.65817	0.716471	0.706723	0.633613	0.631092		0.325734	0.306376	0.307161	0.30315	0.30315		0.826474	0.806383	0.788728	0.680014	0.746748
56.466	0.620588	0.72	0.680952	0.639636	0.659244		0.325296	0.314152	0.342337	0.340157	0.340157		0.826868	0.813602	0.791106	0.679268	0.747156
57.209	0.634314	0.744575	0.67507	0.654482	0.673249		0.341078	0.361586	0.288945	0.295276	0.295276		0.826671	0.809726	0.790325	0.677713	0.74523
57.951	0.602179	0.737516	0.725397	0.661905	0.640196		0.31872	0.352255	0.305905	0.322047	0.322047		0.82991	0.810171	0.793212	0.678211	0.746567
58.694	0.627015	0.713725	0.665266	0.623109	0.641317		0.350285	0.360809	0.313442	0.320472	0.320472		0.827101	0.809175	0.788728	0.68219	0.747858
59.437	0.612418	0.731373	0.69141	0.665826	0.682073		0.296361	0.292379	0.332286	0.288976	0.288976		0.826814	0.814331	0.79576	0.681195	0.743666
60.18	0.630283	0.744706	0.6831	0.619048	0.691036		0.301622	0.317263	0.359925	0.276378	0.276378		0.827476	0.808677	0.799327	0.684926	0.749626
60.923	0.582898	0.73451	0.700467	0.643277	0.684174		0.330995	0.27605	0.310302	0.292126	0.292126		0.824256	0.813549	0.800109	0.68247	0.749331
61.666	0.617102	0.727974	0.686741	0.654902	0.67451		0.328365	0.36703	0.292714	0.330709	0.330709		0.825812	0.81314	0.796542	0.683122	0.748765
62.408	0.595861	0.767974	0.692157	0.659804	0.647619		0.334502	0.271384	0.302764	0.265354	0.265354		0.825902	0.816999	0.794605	0.681008	0.752232
63.153	0.582462	0.749542	0.705229	0.628431	0.647479		0.295046	0.304821	0.313442	0.316535	0.316535		0.827351	0.817479	0.794096	0.690925	0.747949
63.896	0.633115	0.739346	0.7	0.651261	0.670028		0.289785	0.342146	0.342965	0.313386	0.313386		0.828228	0.815238	0.79114	0.679174	0.753365
64.638	0.611438	0.737516	0.694304	0.648319	0.648739		0.323981	0.302488	0.343593	0.285039	0.285039		0.828622	0.818012	0.782817	0.681786	0.748561
65.381	0.630392	0.739477	0.688609	0.639076	0.687115		0.350723	0.307932	0.278266	0.335433	0.335433		0.827548	0.81723	0.793688	0.688594	0.750533
66.124	0.57756	0.743791	0.703735	0.616246	0.641317		0.34064	0.377916	0.273241	0.306299	0.306299		0.827995	0.817034	0.790461	0.684988	0.743349
66.867	0.606427	0.730196	0.698786	0.64888	0.678571		0.357738	0.287714	0.252513	0.310236	0.310236		0.822735	0.82011	0.795624	0.685858	0.747337
67.61	0.583769	0.755033	0.705229	0.639916	0.628711		0.361683	0.368585	0.25	0.271654	0.271654		0.829946	0.818634	0.795013	0.684055	0.755133
68.353	0.590523	0.750196	0.683473	0.668908	0.67437		0.326611	0.304821	0.240578	0.327559	0.327559		0.827942	0.819203	0.795964	0.682594	0.751235
69.096	0.603922	0.717516	0.697386	0.644538	0.654622		0.32705	0.270607	0.307161	0.320472	0.320472		0.831467	0.818137	0.791887	0.687506	0.754861
69.84	0.598475	0.73817	0.723156	0.654902	0.62591		0.362122	0.325039	0.295854	0.27874	0.27874		0.829785	0.813745	0.798818	0.690117	0.751144
70.583	0.602614	0.764706	0.695892	0.633894	0.654902		0.289785	0.271384	0.312814	0.282677	0.282677		0.830303	0.815505	0.800245	0.690335	0.757762
71.325	0.595752	0.719216	0.711951	0.631653	0.632493		0.335379	0.300933	0.261935	0.288976	0.288976		0.829391	0.818901	0.799837	0.69133	0.751258
72.068	0.615686	0.77451	0.658917	0.641176	0.635154		0.330995	0.300933	0.247487	0.265354	0.265354		0.832182	0.814456	0.793654	0.68934	0.755768
72.811	0.608497	0.723922	0.699346	0.626611	0.657703		0.298115	0.293157	0.272613	0.211024	0.211024		0.83118	0.818563	0.79858	0.69391	0.756583
73.554	0.601634	0.74915	0.731466	0.644958	0.67465		0.333187	0.305599	0.294598	0.287402	0.287402		0.833113	0.814509	0.804049	0.693413	0.756719

## Sheet: h
time (s)	WT						WT IFNB						5ST-D						5ST-A
pre-bleach	1	1	1	1	1		1	1	1	1	1		1	1	1	1	1		1	1	1	1	1
0	0.387224	0.438567	0.545307	0.402866	0.482572		0.464906	0.452468	0.57101	0.599824	0.508865		0.483383	0.421556	0.375317	0.488342	0.414878		0.412286	0.470377	0.566406	0.500787	0.614434
1.338	0.524003	0.551154	0.572092	0.489083	0.548117		0.543703	0.563358	0.751637	0.615401	0.554225		0.535553	0.498889	0.489735	0.588709	0.496793		0.523829	0.53122	0.660748	0.555333	0.707087
2.678	0.574359	0.605374	0.587153	0.528608	0.614339		0.624106	0.614715	0.737849	0.618692	0.641262		0.581327	0.507778	0.551942	0.638818	0.535947		0.563486	0.607154	0.705048	0.589549	0.684373
4.018	0.589281	0.625511	0.613124	0.569141	0.662429		0.603969	0.683367	0.692865	0.637231	0.635851		0.595498	0.581778	0.585928	0.647328	0.542494		0.656286	0.59893	0.765274	0.641088	0.711041
5.358	0.584836	0.658091	0.617276	0.601053	0.66394		0.669926	0.666806	0.663737	0.611672	0.671425		0.61688	0.613333	0.614072	0.646875	0.570913		0.668229	0.641808	0.783725	0.705225	0.785078
6.698	0.625857	0.670293	0.609867	0.595566	0.676028		0.686561	0.674772	0.76353	0.650614	0.670389		0.671558	0.648667	0.63391	0.635897	0.60833		0.6984	0.650351	0.782681	0.676736	0.759057
8.038	0.617348	0.66284	0.624359	0.597302	0.695306		0.701591	0.707578	0.855912	0.678697	0.649321		0.619325	0.667778	0.632834	0.682329	0.586192		0.736286	0.705605	0.788338	0.657409	0.743459
9.377	0.631128	0.688447	0.670602	0.638338	0.709373		0.66263	0.705377	0.712513	0.68824	0.731177		0.62083	0.660222	0.643137	0.665962	0.596615		0.743771	0.722852	0.790949	0.745025	0.751581
10.717	0.619571	0.682977	0.64805	0.653174	0.728912		0.72917	0.662928	0.815581	0.664107	0.701474		0.620517	0.641111	0.630373	0.627235	0.598797		0.746971	0.724369	0.795909	0.737867	0.758194
12.057	0.608712	0.677687	0.651795	0.652223	0.715625		0.724354	0.679384	0.757497	0.715226	0.703891		0.642087	0.662889	0.665667	0.645163	0.617416		0.766343	0.678138	0.793908	0.710236	0.763657
13.397	0.629667	0.698064	0.667101	0.643545	0.723962		0.718809	0.73661	0.811789	0.621435	0.716901		0.626035	0.649556	0.6995	0.649595	0.611448		0.775429	0.701054	0.802698	0.695061	0.731311
14.737	0.622619	0.685742	0.658471	0.644161	0.692753		0.707136	0.738602	0.74009	0.721808	0.768478		0.618636	0.682889	0.659746	0.659767	0.615857		0.8192	0.705126	0.82228	0.76335	0.738355
16.077	0.641923	0.693676	0.614426	0.671705	0.727349		0.73632	0.684205	0.839883	0.726854	0.722887		0.638575	0.663778	0.653518	0.66158	0.563385		0.831714	0.709917	0.802089	0.72083	0.736702
17.417	0.630683	0.694217	0.680941	0.663476	0.71375		0.757624	0.765433	0.790934	0.705244	0.733709		0.62616	0.691778	0.662438	0.666969	0.610379		0.810229	0.676541	0.816275	0.748747	0.781555
18.757	0.651003	0.703294	0.645933	0.661684	0.694107		0.816431	0.742061	0.81989	0.711825	0.720815		0.642526	0.647111	0.672895	0.672206	0.64637		0.839543	0.716544	0.800435	0.736435	0.718516
20.095	0.60649	0.701671	0.677847	0.66258	0.726723		0.770611	0.756105	0.776629	0.691641	0.82443		0.626097	0.719111	0.647751	0.647077	0.635189		0.824	0.69275	0.811662	0.747745	0.733108
21.437	0.637351	0.675763	0.674998	0.688781	0.748554		0.747264	0.733361	0.762668	0.715445	0.762491		0.635566	0.691778	0.658593	0.644961	0.622895		0.861943	0.71335	0.800522	0.692341	0.750216
22.777	0.629223	0.730164	0.677115	0.676352	0.753191		0.827083	0.744262	0.811961	0.736068	0.705043		0.653812	0.716889	0.661053	0.647681	0.602851		0.856971	0.752395	0.793908	0.616178	0.750934
24.117	0.629921	0.68484	0.63999	0.691412	0.715157		0.835109	0.713657	0.841951	0.767332	0.739005		0.618385	0.709556	0.665975	0.657551	0.610468		0.794114	0.740977	0.816536	0.730422	0.764304
25.457	0.631064	0.725535	0.675568	0.656198	0.762205		0.80607	0.723928	0.850913	0.727731	0.745222		0.628229	0.763556	0.639446	0.676134	0.608775		0.813314	0.732913	0.818538	0.647244	0.747628
26.797	0.624143	0.703474	0.624522	0.678703	0.734174		0.801401	0.744786	0.812306	0.74649	0.789777		0.636757	0.744667	0.65767	0.664904	0.600223		0.85	0.736187	0.801305	0.677309	0.727861
28.137	0.61938	0.702693	0.640316	0.697402	0.747981		0.807092	0.709988	0.803861	0.78971	0.810385		0.605656	0.669778	0.629066	0.681573	0.614655		0.8316	0.721734	0.800696	0.717967	0.73088
29.477	0.584328	0.682856	0.668078	0.68559	0.739593		0.802568	0.729693	0.77525	0.741115	0.826157		0.611675	0.65	0.644444	0.650602	0.621024		0.862171	0.676461	0.798085	0.661417	0.743675
