# Supplementary material for: Phase transition of WTAP regulates m6A modification of interferon-stimulated genes
Source: eLife. 2025 May 27;13:RP100601. doi: 10.7554/eLife.100601 (PMC12113268; doi:10.7554/eLife.100601)
Supplement: Figure 3—figure supplement 1—source data 3. [file elife-100601-fig3-figsupp1-data3.xlsx]

## Sheet: d
irf9/actin
0.941128	0.941248	0.93943	0.950489
0.838649	0.97997	0.761678	0.691894
0.858129	0.845279	0.648658	0.723647
stat1/actin
0.615489	0.726831	0.749023	0.777892
0.629717	0.750307	0.763344	0.777881
0.61068	0.679751	0.693006	0.541572
stat2/actin
2.38972	2.83387	2.63249	2.62975
1.62333	1.84454	1.67588	1.69505
2.25202	2.65954	2.43538	2.42743
p-stat1/stat1
0	1.95591	0	2.12998
0	1.59607	0	1.29731
0	1.94078	0	1.588
p-stat2/stat2
0	0.282873	0	0.315385
0	0.424349	0	0.517141
0	0.382379	0	0.366996

## Sheet: f
Distance to TSS	overlap peak Num		Distance to TES	overlap peak Num
-2000	203		-2000	562
-1999	203		-1999	562
-1998	203		-1998	562
-1997	203		-1997	562
-1996	203		-1996	562
-1995	203		-1995	562
-1994	203		-1994	562
-1993	203		-1993	562
-1992	203		-1992	561
-1991	203		-1991	561
-1990	203		-1990	561
-1989	203		-1989	561
-1988	203		-1988	559
-1987	203		-1987	559
-1986	203		-1986	559
-1985	204		-1985	559
-1984	204		-1984	559
-1983	205		-1983	559
-1982	205		-1982	559
-1981	205		-1981	559
-1980	205		-1980	560
-1979	205		-1979	560
-1978	205		-1978	560
-1977	205		-1977	560
-1976	205		-1976	561
-1975	205		-1975	561
-1974	205		-1974	561
-1973	205		-1973	561
-1972	205		-1972	561
-1971	205		-1971	561
-1970	205		-1970	561
-1969	205		-1969	561
-1968	205		-1968	561
-1967	205		-1967	558
-1966	205		-1966	558
-1965	205		-1965	558
-1964	205		-1964	558
-1963	205		-1963	558
-1962	205		-1962	559
-1961	205		-1961	559
-1960	205		-1960	559
-1959	205		-1959	559
-1958	205		-1958	559
-1957	205		-1957	559
-1956	205		-1956	558
-1955	205		-1955	558
-1954	205		-1954	559
-1953	205		-1953	559
-1952	205		-1952	559
-1951	205		-1951	559
-1950	205		-1950	558
-1949	205		-1949	558
-1948	205		-1948	558
-1947	205		-1947	558
-1946	205		-1946	558
-1945	207		-1945	558
-1944	207		-1944	558
-1943	207		-1943	558
-1942	207		-1942	558
-1941	207		-1941	558
-1940	207		-1940	558
-1939	207		-1939	558
-1938	207		-1938	558
-1937	207		-1937	558
-1936	209		-1936	558
-1935	209		-1935	558
-1934	209		-1934	558
-1933	209		-1933	562
-1932	209		-1932	563
-1931	209		-1931	563
-1930	209		-1930	563
-1929	209		-1929	563
-1928	209		-1928	563
-1927	209		-1927	563
-1926	209		-1926	563
-1925	209		-1925	563
-1924	209		-1924	563
-1923	213		-1923	563
-1922	213		-1922	563
-1921	213		-1921	563
-1920	214		-1920	563
-1919	214		-1919	563
-1918	214		-1918	563
-1917	214		-1917	563
-1916	214		-1916	563
-1915	214		-1915	563
-1914	214		-1914	563
-1913	214		-1913	563
-1912	214		-1912	563
-1911	214		-1911	563
-1910	214		-1910	562
-1909	215		-1909	562
-1908	215		-1908	562
-1907	215		-1907	562
-1906	215		-1906	562
-1905	215		-1905	562
-1904	216		-1904	562
-1903	216		-1903	562
-1902	216		-1902	562
-1901	216		-1901	562
-1900	216		-1900	562
-1899	216		-1899	563
-1898	216		-1898	563
-1897	216		-1897	563
-1896	216		-1896	563
-1895	216		-1895	561
-1894	216		-1894	561
-1893	216		-1893	561
-1892	216		-1892	561
-1891	216		-1891	561
-1890	216		-1890	561
-1889	216		-1889	561
-1888	216		-1888	561
-1887	216		-1887	560
-1886	213		-1886	560
-1885	213		-1885	560
-1884	213		-1884	560
-1883	213		-1883	560
-1882	213		-1882	560
-1881	213		-1881	558
-1880	213		-1880	558
-1879	213		-1879	558
-1878	213		-1878	558
-1877	213		-1877	558
-1876	213		-1876	558
-1875	213		-1875	558
-1874	213		-1874	558
-1873	213		-1873	558
-1872	213		-1872	558
-1871	213		-1871	558
-1870	213		-1870	558
-1869	213		-1869	558
-1868	213		-1868	558
-1867	213		-1867	558
-1866	213		-1866	558
-1865	213		-1865	558
-1864	213		-1864	558
-1863	213		-1863	560
-1862	213		-1862	560
-1861	213		-1861	560
-1860	213		-1860	560
-1859	213		-1859	560
-1858	213		-1858	560
-1857	213		-1857	560
-1856	213		-1856	560
-1855	213		-1855	560
-1854	213		-1854	560
-1853	213		-1853	560
-1852	213		-1852	561
-1851	213		-1851	561
-1850	213		-1850	561
-1849	213		-1849	561
-1848	213		-1848	561
-1847	213		-1847	561
-1846	213		-1846	561
-1845	213		-1845	561
-1844	213		-1844	561
-1843	213		-1843	561
-1842	215		-1842	564
-1841	215		-1841	564
-1840	215		-1840	564
-1839	215		-1839	564
-1838	215		-1838	564
-1837	215		-1837	564
-1836	215		-1836	564
-1835	215		-1835	564
-1834	215		-1834	563
-1833	215		-1833	563
-1832	215		-1832	563
-1831	215		-1831	563
-1830	215		-1830	563
-1829	215		-1829	563
-1828	215		-1828	563
-1827	215		-1827	563
-1826	215		-1826	563
-1825	215		-1825	563
-1824	215		-1824	563
-1823	215		-1823	563
-1822	215		-1822	563
-1821	215		-1821	563
-1820	215		-1820	563
-1819	215		-1819	563
-1818	215		-1818	563
-1817	215		-1817	563
-1816	215		-1816	563
-1815	215		-1815	563
-1814	215		-1814	563
-1813	215		-1813	564
-1812	215		-1812	564
-1811	215		-1811	564
-1810	215		-1810	565
-1809	215		-1809	565
-1808	216		-1808	565
-1807	216		-1807	566
-1806	216		-1806	566
-1805	216		-1805	568
-1804	216		-1804	568
-1803	216		-1803	568
-1802	216		-1802	568
-1801	216		-1801	568
-1800	216		-1800	568
-1799	216		-1799	568
-1798	216		-1798	568
-1797	216		-1797	566
-1796	216		-1796	568
-1795	216		-1795	569
-1794	216		-1794	569
-1793	216		-1793	569
-1792	216		-1792	569
-1791	216		-1791	569
-1790	216		-1790	569
-1789	216		-1789	569
-1788	216		-1788	569
-1787	216		-1787	570
-1786	216		-1786	568
-1785	216		-1785	568
-1784	216		-1784	568
-1783	216		-1783	568
-1782	216		-1782	568
-1781	216		-1781	568
-1780	219		-1780	568
-1779	219		-1779	568
-1778	219		-1778	568
-1777	219		-1777	568
-1776	219		-1776	568
-1775	219		-1775	566
-1774	219		-1774	566
-1773	219		-1773	566
-1772	219		-1772	566
-1771	219		-1771	566
-1770	219		-1770	566
-1769	219		-1769	566
-1768	219		-1768	566
-1767	219		-1767	567
-1766	219		-1766	567
-1765	219		-1765	567
-1764	219		-1764	567
-1763	219		-1763	567
-1762	219		-1762	568
-1761	219		-1761	568
-1760	219		-1760	568
-1759	219		-1759	568
-1758	219		-1758	569
-1757	219		-1757	567
-1756	220		-1756	567
-1755	220		-1755	567
-1754	220		-1754	567
-1753	220		-1753	567
-1752	220		-1752	567
-1751	220		-1751	566
-1750	220		-1750	566
-1749	220		-1749	566
-1748	220		-1748	566
-1747	220		-1747	565
-1746	220		-1746	565
-1745	220		-1745	565
-1744	220		-1744	565
-1743	220		-1743	565
-1742	220		-1742	565
-1741	220		-1741	565
-1740	220		-1740	565
-1739	220		-1739	565
-1738	220		-1738	565
-1737	220		-1737	565
-1736	220		-1736	565
-1735	220		-1735	565
-1734	220		-1734	565
-1733	220		-1733	565
-1732	220		-1732	565
-1731	220		-1731	565
-1730	220		-1730	565
-1729	220		-1729	565
-1728	220		-1728	565
-1727	220		-1727	565
-1726	220		-1726	565
-1725	220		-1725	565
-1724	220		-1724	566
-1723	220		-1723	566
-1722	220		-1722	566
-1721	220		-1721	566
-1720	220		-1720	566
-1719	220		-1719	566
-1718	221		-1718	566
-1717	221		-1717	566
-1716	221		-1716	566
-1715	222		-1715	567
-1714	222		-1714	568
-1713	222		-1713	568
-1712	222		-1712	568
-1711	222		-1711	568
-1710	221		-1710	568
-1709	221		-1709	568
-1708	221		-1708	568
-1707	221		-1707	570
-1706	221		-1706	572
-1705	221		-1705	572
-1704	221		-1704	570
-1703	221		-1703	570
-1702	221		-1702	570
-1701	221		-1701	572
-1700	221		-1700	572
-1699	221		-1699	572
-1698	221		-1698	572
-1697	221		-1697	572
-1696	221		-1696	574
-1695	221		-1695	574
-1694	221		-1694	574
-1693	221		-1693	574
-1692	221		-1692	574
-1691	221		-1691	576
-1690	221		-1690	576
-1689	221		-1689	576
-1688	221		-1688	578
-1687	221		-1687	578
-1686	221		-1686	578
-1685	221		-1685	580
-1684	221		-1684	580
-1683	221		-1683	583
-1682	221		-1682	584
-1681	221		-1681	584
-1680	221		-1680	585
-1679	221		-1679	585
-1678	221		-1678	585
-1677	221		-1677	585
-1676	221		-1676	585
-1675	221		-1675	585
-1674	221		-1674	585
-1673	221		-1673	586
-1672	221		-1672	586
-1671	221		-1671	586
-1670	221		-1670	586
-1669	221		-1669	586
-1668	221		-1668	586
-1667	221		-1667	586
-1666	221		-1666	586
-1665	221		-1665	586
-1664	221		-1664	586
-1663	221		-1663	586
-1662	221		-1662	587
-1661	221		-1661	587
-1660	221		-1660	587
-1659	221		-1659	587
-1658	221		-1658	587
-1657	221		-1657	587
-1656	221		-1656	587
-1655	221		-1655	587
-1654	221		-1654	587
-1653	221		-1653	587
-1652	221		-1652	587
-1651	221		-1651	587
-1650	221		-1650	587
-1649	221		-1649	587
-1648	221		-1648	587
-1647	221		-1647	588
-1646	221		-1646	588
-1645	221		-1645	588
-1644	221		-1644	588
-1643	221		-1643	588
-1642	221		-1642	588
-1641	221		-1641	588
-1640	221		-1640	588
-1639	221		-1639	588
-1638	221		-1638	588
-1637	221		-1637	588
-1636	221		-1636	588
-1635	221		-1635	588
-1634	221		-1634	588
-1633	221		-1633	588
-1632	221		-1632	588
-1631	221		-1631	588
-1630	221		-1630	588
-1629	223		-1629	588
-1628	223		-1628	589
-1627	223		-1627	589
-1626	223		-1626	588
-1625	223		-1625	588
-1624	223		-1624	588
-1623	223		-1623	588
-1622	223		-1622	588
-1621	223		-1621	588
-1620	223		-1620	588
-1619	223		-1619	588
-1618	223		-1618	588
-1617	223		-1617	588
-1616	223		-1616	588
-1615	223		-1615	588
-1614	223		-1614	588
-1613	223		-1613	588
-1612	223		-1612	588
-1611	223		-1611	588
-1610	223		-1610	588
-1609	223		-1609	589
-1608	223		-1608	589
-1607	223		-1607	589
-1606	223		-1606	589
-1605	223		-1605	589
-1604	223		-1604	589
-1603	223		-1603	589
-1602	223		-1602	589
-1601	223		-1601	588
-1600	223		-1600	588
-1599	223		-1599	588
-1598	223		-1598	588
-1597	223		-1597	588
-1596	223		-1596	588
-1595	223		-1595	589
-1594	223		-1594	589
-1593	223		-1593	589
-1592	223		-1592	589
-1591	223		-1591	590
-1590	223		-1590	589
-1589	223		-1589	589
-1588	223		-1588	589
-1587	223		-1587	589
-1586	223		-1586	587
-1585	223		-1585	587
-1584	223		-1584	587
-1583	223		-1583	587
-1582	223		-1582	587
-1581	223		-1581	587
-1580	223		-1580	587
-1579	223		-1579	587
-1578	223		-1578	587
-1577	223		-1577	587
-1576	223		-1576	587
-1575	223		-1575	587
-1574	223		-1574	587
-1573	223		-1573	587
-1572	223		-1572	587
-1571	223		-1571	587
-1570	223		-1570	590
-1569	223		-1569	592
-1568	223		-1568	592
-1567	224		-1567	593
-1566	224		-1566	593
-1565	224		-1565	593
-1564	224		-1564	593
-1563	224		-1563	593
-1562	224		-1562	594
-1561	224		-1561	594
-1560	224		-1560	594
-1559	224		-1559	595
-1558	224		-1558	594
-1557	225		-1557	594
-1556	225		-1556	594
-1555	226		-1555	594
-1554	226		-1554	593
-1553	226		-1553	594
-1552	226		-1552	594
-1551	226		-1551	594
-1550	227		-1550	594
-1549	227		-1549	594
-1548	227		-1548	594
-1547	227		-1547	594
-1546	227		-1546	594
-1545	227		-1545	594
-1544	227		-1544	594
-1543	228		-1543	595
-1542	228		-1542	595
-1541	228		-1541	595
-1540	228		-1540	595
-1539	228		-1539	595
-1538	228		-1538	595
-1537	228		-1537	595
-1536	228		-1536	595
-1535	228		-1535	596
-1534	228		-1534	596
-1533	228		-1533	596
-1532	228		-1532	596
-1531	228		-1531	596
-1530	228		-1530	596
-1529	228		-1529	598
-1528	228		-1528	598
-1527	228		-1527	598
-1526	228		-1526	598
-1525	228		-1525	599
-1524	228		-1524	599
-1523	228		-1523	599
-1522	230		-1522	600
-1521	230		-1521	600
-1520	230		-1520	600
-1519	230		-1519	600
-1518	230		-1518	600
-1517	230		-1517	600
-1516	230		-1516	600
-1515	230		-1515	600
-1514	230		-1514	600
-1513	230		-1513	601
-1512	230		-1512	601
-1511	230		-1511	601
-1510	230		-1510	601
-1509	230		-1509	601
-1508	230		-1508	601
-1507	230		-1507	601
-1506	230		-1506	601
-1505	230		-1505	601
-1504	230		-1504	600
-1503	230		-1503	600
-1502	230		-1502	600
-1501	230		-1501	600
-1500	230		-1500	600
-1499	230		-1499	600
-1498	230		-1498	600
-1497	231		-1497	600
-1496	231		-1496	601
-1495	231		-1495	601
-1494	231		-1494	601
-1493	231		-1493	601
-1492	231		-1492	601
-1491	231		-1491	601
-1490	231		-1490	602
-1489	231		-1489	602
-1488	231		-1488	602
-1487	231		-1487	603
-1486	231		-1486	603
-1485	231		-1485	603
-1484	231		-1484	603
-1483	231		-1483	603
-1482	231		-1482	603
-1481	231		-1481	603
-1480	231		-1480	603
-1479	231		-1479	603
-1478	231		-1478	605
-1477	231		-1477	606
-1476	231		-1476	606
-1475	231		-1475	607
-1474	231		-1474	607
-1473	231		-1473	606
-1472	231		-1472	606
-1471	231		-1471	606
-1470	231		-1470	606
-1469	231		-1469	606
-1468	231		-1468	606
-1467	231		-1467	606
-1466	231		-1466	606
-1465	231		-1465	606
-1464	231		-1464	606
-1463	231		-1463	606
-1462	231		-1462	606
-1461	231		-1461	606
-1460	231		-1460	606
-1459	231		-1459	604
-1458	231		-1458	604
-1457	231		-1457	604
-1456	231		-1456	604
-1455	231		-1455	604
-1454	231		-1454	604
-1453	231		-1453	605
-1452	231		-1452	605
-1451	231		-1451	605
-1450	231		-1450	605
-1449	231		-1449	605
-1448	231		-1448	605
-1447	231		-1447	605
-1446	231		-1446	605
-1445	231		-1445	605
-1444	231		-1444	605
-1443	231		-1443	605
-1442	231		-1442	605
-1441	231		-1441	605
-1440	231		-1440	605
-1439	231		-1439	605
-1438	231		-1438	605
-1437	231		-1437	605
-1436	231		-1436	605
-1435	231		-1435	605
-1434	231		-1434	606
-1433	231		-1433	606
-1432	231		-1432	606
-1431	231		-1431	607
-1430	231		-1430	607
-1429	231		-1429	607
-1428	231		-1428	607
-1427	231		-1427	607
-1426	231		-1426	607
-1425	231		-1425	607
-1424	231		-1424	607
-1423	231		-1423	607
-1422	231		-1422	607
-1421	231		-1421	607
-1420	231		-1420	608
-1419	231		-1419	608
-1418	231		-1418	608
-1417	231		-1417	608
-1416	231		-1416	607
-1415	231		-1415	607
-1414	231		-1414	607
-1413	231		-1413	607
-1412	231		-1412	607
-1411	231		-1411	607
-1410	231		-1410	607
-1409	231		-1409	608
-1408	231		-1408	608
-1407	231		-1407	608
-1406	231		-1406	608
-1405	231		-1405	608
-1404	231		-1404	608
-1403	231		-1403	608
-1402	231		-1402	608
-1401	231		-1401	607
-1400	231		-1400	607
-1399	231		-1399	607
-1398	231		-1398	606
-1397	231		-1397	607
-1396	231		-1396	607
-1395	231		-1395	607
-1394	231		-1394	608
-1393	231		-1393	608
-1392	231		-1392	608
-1391	231		-1391	608
-1390	231		-1390	608
-1389	231		-1389	608
-1388	231		-1388	608
-1387	231		-1387	608
-1386	231		-1386	608
-1385	231		-1385	608
-1384	231		-1384	608
-1383	231		-1383	608
-1382	231		-1382	609
-1381	231		-1381	609
-1380	231		-1380	609
-1379	231		-1379	609
-1378	231		-1378	609
-1377	231		-1377	609
-1376	231		-1376	609
-1375	231		-1375	609
-1374	231		-1374	609
-1373	231		-1373	608
-1372	231		-1372	608
-1371	231		-1371	608
-1370	231		-1370	608
-1369	231		-1369	608
-1368	231		-1368	608
-1367	231		-1367	608
-1366	231		-1366	607
-1365	231		-1365	607
-1364	231		-1364	607
-1363	231		-1363	607
-1362	231		-1362	607
-1361	231		-1361	607
-1360	231		-1360	609
-1359	231		-1359	609
-1358	231		-1358	609
-1357	231		-1357	609
-1356	231		-1356	609
-1355	231		-1355	609
-1354	231		-1354	609
-1353	231		-1353	609
-1352	231		-1352	609
-1351	231		-1351	609
-1350	231		-1350	609
-1349	231		-1349	609
-1348	231		-1348	609
-1347	231		-1347	609
-1346	231		-1346	609
-1345	231		-1345	609
-1344	231		-1344	609
-1343	231		-1343	609
-1342	231		-1342	609
-1341	231		-1341	609
-1340	231		-1340	608
-1339	231		-1339	608
-1338	231		-1338	608
-1337	231		-1337	608
-1336	231		-1336	607
-1335	231		-1335	607
-1334	231		-1334	610
-1333	231		-1333	610
-1332	231		-1332	610
-1331	231		-1331	610
-1330	231		-1330	610
-1329	231		-1329	610
-1328	231		-1328	610
-1327	231		-1327	610
-1326	231		-1326	609
-1325	231		-1325	609
-1324	231		-1324	609
-1323	231		-1323	609
-1322	231		-1322	609
-1321	231		-1321	609
-1320	231		-1320	609
-1319	231		-1319	610
-1318	231		-1318	610
-1317	231		-1317	610
-1316	231		-1316	610
-1315	231		-1315	610
-1314	231		-1314	609
-1313	231		-1313	610
-1312	231		-1312	610
-1311	231		-1311	610
-1310	231		-1310	610
-1309	231		-1309	610
-1308	231		-1308	610
-1307	231		-1307	610
-1306	231		-1306	610
-1305	231		-1305	610
-1304	231		-1304	610
-1303	231		-1303	610
-1302	231		-1302	610
-1301	231		-1301	610
-1300	231		-1300	609
-1299	231		-1299	610
-1298	231		-1298	609
-1297	231		-1297	609
-1296	231		-1296	609
-1295	231		-1295	609
-1294	231		-1294	609
-1293	231		-1293	609
-1292	231		-1292	609
-1291	231		-1291	609
-1290	231		-1290	609
-1289	231		-1289	609
-1288	231		-1288	610
-1287	231		-1287	610
-1286	231		-1286	610
-1285	231		-1285	610
-1284	231		-1284	612
-1283	231		-1283	612
-1282	231		-1282	613
-1281	231		-1281	613
-1280	231		-1280	614
-1279	231		-1279	614
-1278	231		-1278	614
-1277	231		-1277	614
-1276	231		-1276	614
-1275	231		-1275	614
-1274	231		-1274	614
-1273	231		-1273	614
-1272	231		-1272	614
-1271	231		-1271	614
-1270	231		-1270	614
-1269	231		-1269	612
-1268	231		-1268	612
-1267	231		-1267	612
-1266	231		-1266	612
-1265	231		-1265	612
-1264	231		-1264	612
-1263	231		-1263	612
-1262	231		-1262	612
-1261	232		-1261	612
-1260	232		-1260	612
-1259	232		-1259	612
-1258	232		-1258	612
-1257	232		-1257	614
-1256	232		-1256	614
-1255	232		-1255	614
-1254	232		-1254	613
-1253	232		-1253	613
-1252	232		-1252	613
-1251	232		-1251	613
-1250	232		-1250	613
-1249	232		-1249	613
-1248	232		-1248	613
-1247	232		-1247	613
-1246	232		-1246	616
-1245	232		-1245	616
-1244	232		-1244	616
-1243	232		-1243	613
-1242	232		-1242	613
-1241	232		-1241	613
-1240	232		-1240	613
-1239	232		-1239	613
-1238	232		-1238	613
-1237	232		-1237	613
-1236	232		-1236	613
-1235	232		-1235	613
-1234	232		-1234	613
-1233	232		-1233	612
-1232	232		-1232	612
-1231	232		-1231	612
-1230	232		-1230	612
-1229	232		-1229	612
-1228	232		-1228	612
-1227	232		-1227	612
-1226	232		-1226	612
-1225	232		-1225	612
-1224	232		-1224	612
-1223	232		-1223	612
-1222	232		-1222	612
-1221	232		-1221	612
-1220	232		-1220	612
-1219	232		-1219	612
-1218	232		-1218	614
-1217	232		-1217	613
-1216	233		-1216	613
-1215	233		-1215	613
-1214	233		-1214	613
-1213	233		-1213	615
-1212	233		-1212	615
-1211	233		-1211	615
-1210	233		-1210	615
-1209	233		-1209	615
-1208	233		-1208	615
-1207	233		-1207	617
-1206	233		-1206	615
-1205	233		-1205	615
-1204	233		-1204	615
-1203	233		-1203	615
-1202	233		-1202	615
-1201	233		-1201	615
-1200	233		-1200	615
-1199	233		-1199	615
-1198	233		-1198	615
-1197	233		-1197	616
-1196	233		-1196	616
-1195	233		-1195	616
-1194	233		-1194	615
-1193	233		-1193	615
-1192	233		-1192	617
-1191	233		-1191	617
-1190	233		-1190	618
-1189	233		-1189	618
-1188	233		-1188	618
-1187	233		-1187	618
-1186	233		-1186	618
-1185	233		-1185	618
-1184	233		-1184	618
-1183	233		-1183	618
-1182	233		-1182	618
-1181	233		-1181	618
-1180	233		-1180	618
-1179	233		-1179	618
-1178	233		-1178	618
-1177	233		-1177	618
-1176	233		-1176	618
-1175	233		-1175	618
-1174	233		-1174	618
-1173	233		-1173	618
-1172	233		-1172	618
-1171	233		-1171	618
-1170	233		-1170	620
-1169	233		-1169	620
-1168	233		-1168	620
-1167	234		-1167	620
-1166	234		-1166	620
-1165	234		-1165	622
-1164	234		-1164	622
-1163	234		-1163	622
-1162	234		-1162	624
-1161	234		-1161	626
-1160	234		-1160	626
-1159	234		-1159	626
-1158	234		-1158	626
-1157	234		-1157	627
-1156	234		-1156	627
-1155	234		-1155	627
-1154	234		-1154	627
-1153	234		-1153	627
-1152	234		-1152	628
-1151	234		-1151	628
-1150	234		-1150	628
-1149	234		-1149	628
-1148	234		-1148	627
-1147	234		-1147	627
-1146	234		-1146	627
-1145	235		-1145	627
-1144	235		-1144	627
-1143	235		-1143	627
-1142	235		-1142	627
-1141	235		-1141	626
-1140	235		-1140	626
-1139	235		-1139	626
-1138	235		-1138	625
-1137	235		-1137	625
-1136	236		-1136	625
-1135	236		-1135	625
-1134	236		-1134	625
-1133	236		-1133	625
-1132	236		-1132	625
-1131	236		-1131	625
-1130	236		-1130	625
-1129	236		-1129	625
-1128	236		-1128	625
-1127	236		-1127	625
-1126	236		-1126	625
-1125	236		-1125	625
-1124	236		-1124	625
-1123	236		-1123	624
-1122	236		-1122	624
-1121	236		-1121	625
-1120	236		-1120	625
-1119	236		-1119	625
-1118	236		-1118	625
-1117	236		-1117	625
-1116	236		-1116	625
-1115	236		-1115	625
-1114	236		-1114	625
-1113	236		-1113	625
-1112	236		-1112	625
-1111	236		-1111	625
-1110	236		-1110	625
-1109	236		-1109	625
-1108	236		-1108	625
-1107	236		-1107	625
-1106	236		-1106	625
-1105	236		-1105	625
-1104	236		-1104	625
-1103	236		-1103	625
-1102	236		-1102	627
-1101	236		-1101	627
-1100	236		-1100	627
-1099	236		-1099	627
-1098	236		-1098	627
-1097	236		-1097	627
-1096	236		-1096	627
-1095	236		-1095	627
-1094	236		-1094	627
-1093	236		-1093	627
-1092	236		-1092	627
-1091	236		-1091	628
-1090	236		-1090	628
-1089	236		-1089	628
-1088	236		-1088	628
-1087	236		-1087	628
-1086	236		-1086	628
-1085	236		-1085	628
-1084	236		-1084	628
-1083	236		-1083	628
-1082	236		-1082	628
-1081	236		-1081	628
-1080	236		-1080	628
-1079	236		-1079	628
-1078	237		-1078	628
-1077	237		-1077	628
-1076	237		-1076	628
-1075	237		-1075	628
-1074	237		-1074	628
-1073	237		-1073	628
-1072	237		-1072	629
-1071	237		-1071	629
-1070	237		-1070	630
-1069	237		-1069	630
-1068	237		-1068	630
-1067	237		-1067	630
-1066	237		-1066	631
-1065	238		-1065	631
-1064	238		-1064	631
-1063	238		-1063	631
-1062	238		-1062	631
-1061	238		-1061	631
-1060	238		-1060	631
-1059	238		-1059	631
-1058	238		-1058	631
-1057	238		-1057	630
-1056	240		-1056	630
-1055	240		-1055	630
-1054	240		-1054	630
-1053	240		-1053	630
-1052	240		-1052	630
-1051	240		-1051	630
-1050	240		-1050	630
-1049	240		-1049	630
-1048	240		-1048	630
-1047	240		-1047	630
-1046	240		-1046	630
-1045	240		-1045	630
-1044	240		-1044	630
-1043	240		-1043	630
-1042	240		-1042	630
-1041	240		-1041	630
-1040	240		-1040	631
-1039	240		-1039	631
-1038	240		-1038	632
-1037	240		-1037	632
-1036	240		-1036	632
-1035	239		-1035	632
-1034	239		-1034	632
-1033	239		-1033	632
-1032	239		-1032	630
-1031	239		-1031	630
-1030	239		-1030	629
-1029	239		-1029	629
-1028	239		-1028	630
-1027	240		-1027	630
-1026	240		-1026	630
-1025	240		-1025	630
-1024	240		-1024	630
-1023	240		-1023	630
-1022	240		-1022	631
-1021	240		-1021	631
-1020	240		-1020	631
-1019	240		-1019	631
-1018	240		-1018	631
-1017	241		-1017	631
-1016	241		-1016	631
-1015	241		-1015	631
-1014	241		-1014	631
-1013	241		-1013	631
-1012	241		-1012	631
-1011	241		-1011	631
-1010	241		-1010	631
-1009	241		-1009	631
-1008	241		-1008	631
-1007	241		-1007	631
-1006	241		-1006	632
-1005	241		-1005	632
-1004	241		-1004	632
-1003	241		-1003	633
-1002	241		-1002	636
-1001	241		-1001	637
-1000	242		-1000	637
-999	242		-999	637
-998	242		-998	637
-997	243		-997	637
-996	243		-996	638
-995	243		-995	638
-994	244		-994	638
-993	244		-993	640
-992	244		-992	640
-991	244		-991	640
-990	244		-990	641
-989	244		-989	641
-988	244		-988	641
-987	244		-987	641
-986	244		-986	641
-985	244		-985	641
-984	244		-984	641
-983	244		-983	641
-982	244		-982	641
-981	244		-981	641
-980	244		-980	641
-979	244		-979	641
-978	244		-978	641
-977	244		-977	641
-976	244		-976	641
-975	244		-975	641
-974	244		-974	641
-973	244		-973	641
-972	244		-972	641
-971	244		-971	641
-970	244		-970	641
-969	244		-969	640
-968	244		-968	640
-967	244		-967	641
-966	244		-966	641
-965	244		-965	643
-964	244		-964	642
-963	244		-963	642
-962	244		-962	642
-961	244		-961	642
-960	244		-960	642
-959	244		-959	642
-958	244		-958	642
-957	244		-957	642
-956	244		-956	643
-955	244		-955	643
-954	244		-954	642
-953	244		-953	642
-952	244		-952	642
-951	244		-951	642
-950	244		-950	642
-949	244		-949	642
-948	244		-948	642
-947	244		-947	642
-946	244		-946	642
-945	244		-945	643
-944	244		-944	643
-943	244		-943	643
-942	244		-942	642
-941	246		-941	642
-940	246		-940	642
-939	246		-939	642
-938	246		-938	642
-937	246		-937	642
-936	246		-936	642
-935	244		-935	642
-934	244		-934	642
-933	244		-933	642
-932	244		-932	642
-931	244		-931	642
-930	244		-930	642
-929	244		-929	642
-928	244		-928	642
-927	244		-927	642
-926	244		-926	639
-925	244		-925	639
-924	244		-924	639
-923	244		-923	639
-922	244		-922	639
-921	244		-921	638
-920	245		-920	638
-919	244		-919	638
-918	245		-918	638
-917	245		-917	638
-916	245		-916	638
-915	245		-915	638
-914	245		-914	638
-913	245		-913	637
-912	245		-912	637
-911	245		-911	637
-910	245		-910	637
-909	245		-909	637
-908	245		-908	637
-907	245		-907	637
-906	245		-906	637
-905	245		-905	637
-904	245		-904	637
-903	245		-903	637
-902	245		-902	637
-901	245		-901	637
-900	245		-900	637
-899	245		-899	638
-898	245		-898	638
-897	245		-897	638
-896	245		-896	638
-895	245		-895	638
-894	245		-894	638
-893	245		-893	638
-892	245		-892	638
-891	245		-891	638
-890	245		-890	639
-889	245		-889	639
-888	245		-888	639
-887	245		-887	640
-886	245		-886	640
-885	245		-885	640
-884	245		-884	640
-883	245		-883	641
-882	245		-882	641
-881	245		-881	641
-880	245		-880	641
-879	245		-879	641
-878	245		-878	641
-877	245		-877	641
-876	245		-876	641
-875	245		-875	641
-874	245		-874	641
-873	245		-873	641
-872	250		-872	641
-871	250		-871	641
-870	250		-870	641
-869	250		-869	641
-868	250		-868	641
-867	250		-867	641
-866	250		-866	641
-865	250		-865	641
-864	250		-864	643
-863	250		-863	643
-862	250		-862	643
-861	250		-861	643
-860	250		-860	643
-859	250		-859	643
-858	250		-858	643
-857	250		-857	643
-856	250		-856	643
-855	250		-855	643
-854	250		-854	644
-853	250		-853	644
-852	250		-852	645
-851	250		-851	645
-850	250		-850	645
-849	250		-849	645
-848	251		-848	645
-847	251		-847	644
-846	251		-846	646
-845	251		-845	646
-844	251		-844	647
-843	251		-843	647
-842	251		-842	647
-841	251		-841	647
-840	251		-840	650
-839	251		-839	650
-838	251		-838	650
-837	251		-837	651
-836	251		-836	653
-835	251		-835	653
-834	251		-834	653
-833	251		-833	653
-832	251		-832	653
-831	251		-831	654
-830	251		-830	654
-829	253		-829	654
-828	253		-828	654
-827	253		-827	654
-826	253		-826	656
-825	253		-825	656
-824	253		-824	656
-823	253		-823	656
-822	253		-822	656
-821	253		-821	656
-820	253		-820	656
-819	253		-819	656
-818	253		-818	656
-817	253		-817	656
-816	253		-816	656
-815	253		-815	657
-814	254		-814	659
-813	254		-813	659
-812	254		-812	659
-811	254		-811	661
-810	254		-810	661
-809	254		-809	661
-808	254		-808	661
-807	254		-807	661
-806	254		-806	661
-805	254		-805	661
-804	254		-804	661
-803	254		-803	662
-802	254		-802	664
-801	256		-801	664
-800	256		-800	664
-799	256		-799	664
-798	256		-798	664
-797	256		-797	664
-796	256		-796	664
-795	256		-795	664
-794	256		-794	664
-793	256		-793	664
-792	256		-792	664
-791	256		-791	664
-790	256		-790	664
-789	256		-789	664
-788	256		-788	664
-787	256		-787	664
-786	256		-786	666
-785	256		-785	666
-784	256		-784	667
-783	256		-783	668
-782	256		-782	668
-781	256		-781	668
-780	256		-780	668
-779	256		-779	668
-778	256		-778	668
-777	256		-777	668
-776	256		-776	668
-775	256		-775	668
-774	256		-774	671
-773	256		-773	672
-772	256		-772	672
-771	256		-771	673
-770	256		-770	673
-769	256		-769	673
-768	256		-768	672
-767	256		-767	672
-766	256		-766	674
-765	256		-765	674
-764	256		-764	674
-763	256		-763	674
-762	256		-762	674
-761	256		-761	674
-760	256		-760	674
-759	256		-759	674
-758	256		-758	676
-757	256		-757	676
-756	256		-756	676
-755	256		-755	676
-754	257		-754	676
-753	257		-753	676
-752	257		-752	676
-751	257		-751	676
-750	257		-750	676
-749	257		-749	676
-748	257		-748	676
-747	257		-747	676
-746	257		-746	676
-745	257		-745	676
-744	257		-744	676
-743	257		-743	676
-742	257		-742	676
-741	257		-741	676
-740	258		-740	676
-739	257		-739	676
-738	257		-738	676
-737	257		-737	676
-736	257		-736	676
-735	257		-735	676
-734	257		-734	676
-733	257		-733	676
-732	257		-732	676
-731	257		-731	676
-730	257		-730	675
-729	257		-729	675
-728	257		-728	675
-727	257		-727	675
-726	257		-726	675
-725	257		-725	675
-724	257		-724	675
-723	257		-723	675
-722	257		-722	675
-721	257		-721	675
-720	257		-720	675
-719	257		-719	675
-718	257		-718	675
-717	257		-717	675
-716	257		-716	675
-715	257		-715	675
-714	257		-714	675
-713	257		-713	675
-712	257		-712	675
-711	258		-711	676
-710	258		-710	676
-709	258		-709	676
-708	258		-708	676
-707	258		-707	676
-706	258		-706	676
-705	258		-705	676
-704	258		-704	676
-703	258		-703	676
-702	258		-702	677
-701	258		-701	676
-700	258		-700	676
-699	258		-699	676
-698	258		-698	676
-697	258		-697	679
-696	258		-696	684
-695	259		-695	684
-694	260		-694	684
-693	260		-693	684
-692	260		-692	684
-691	260		-691	685
-690	260		-690	686
-689	260		-689	686
-688	261		-688	686
-687	261		-687	686
-686	261		-686	686
-685	261		-685	686
-684	261		-684	686
-683	261		-683	687
-682	261		-682	687
-681	261		-681	687
-680	262		-680	687
-679	262		-679	687
-678	262		-678	687
-677	262		-677	687
-676	262		-676	687
-675	262		-675	687
-674	262		-674	687
-673	262		-673	688
-672	262		-672	687
-671	262		-671	687
-670	262		-670	689
-669	262		-669	689
-668	262		-668	689
-667	262		-667	689
-666	264		-666	689
-665	264		-665	689
-664	264		-664	690
-663	264		-663	690
-662	264		-662	690
-661	264		-661	690
-660	264		-660	690
-659	264		-659	690
-658	264		-658	690
-657	266		-657	690
-656	267		-656	690
-655	267		-655	690
-654	267		-654	690
-653	267		-653	690
-652	267		-652	689
-651	267		-651	689
-650	267		-650	689
-649	267		-649	689
-648	267		-648	687
-647	267		-647	687
-646	267		-646	687
-645	267		-645	688
-644	267		-644	688
-643	267		-643	690
-642	267		-642	690
-641	267		-641	690
-640	267		-640	690
-639	267		-639	691
-638	268		-638	691
-637	268		-637	692
-636	268		-636	692
-635	268		-635	692
-634	268		-634	692
-633	268		-633	693
-632	268		-632	691
-631	268		-631	691
-630	268		-630	691
-629	269		-629	691
-628	269		-628	690
-627	269		-627	690
-626	269		-626	690
-625	269		-625	690
-624	269		-624	691
-623	269		-623	691
-622	269		-622	691
-621	269		-621	691
-620	270		-620	691
-619	270		-619	691
-618	270		-618	691
-617	270		-617	691
-616	270		-616	691
-615	270		-615	691
-614	270		-614	691
-613	270		-613	691
-612	270		-612	691
-611	272		-611	691
-610	272		-610	691
-609	272		-609	690
-608	272		-608	690
-607	272		-607	690
-606	272		-606	690
-605	272		-605	690
-604	272		-604	690
-603	272		-603	690
-602	272		-602	690
-601	273		-601	693
-600	273		-600	695
-599	273		-599	700
-598	273		-598	700
-597	273		-597	700
-596	273		-596	700
-595	273		-595	700
-594	273		-594	700
-593	273		-593	700
-592	273		-592	700
-591	273		-591	700
-590	273		-590	700
-589	273		-589	702
-588	273		-588	703
-587	274		-587	703
-586	274		-586	703
-585	274		-585	704
-584	274		-584	704
-583	275		-583	704
-582	275		-582	704
-581	275		-581	704
-580	275		-580	704
-579	275		-579	704
-578	275		-578	704
-577	275		-577	704
-576	275		-576	703
-575	275		-575	703
-574	275		-574	703
-573	275		-573	703
-572	275		-572	703
-571	275		-571	707
-570	275		-570	707
-569	275		-569	707
-568	275		-568	707
-567	275		-567	707
-566	275		-566	710
-565	275		-565	710
-564	275		-564	710
-563	275		-563	710
-562	275		-562	710
-561	275		-561	710
-560	275		-560	710
-559	275		-559	710
-558	275		-558	710
-557	275		-557	710
-556	275		-556	710
-555	278		-555	710
-554	278		-554	710
-553	278		-553	710
-552	278		-552	710
-551	278		-551	711
-550	278		-550	713
-549	278		-549	713
-548	278		-548	713
-547	278		-547	713
-546	278		-546	713
-545	278		-545	713
-544	278		-544	713
-543	278		-543	713
-542	278		-542	714
-541	278		-541	714
-540	278		-540	714
-539	278		-539	716
-538	278		-538	718
-537	277		-537	718
-536	277		-536	718
-535	277		-535	718
-534	276		-534	718
-533	276		-533	718
-532	276		-532	717
-531	278		-531	717
-530	278		-530	717
-529	278		-529	719
-528	278		-528	719
-527	278		-527	719
-526	278		-526	719
-525	278		-525	719
-524	278		-524	719
-523	278		-523	719
-522	278		-522	719
-521	278		-521	719
-520	278		-520	719
-519	278		-519	721
-518	278		-518	721
-517	278		-517	721
-516	278		-516	721
-515	278		-515	721
-514	278		-514	721
-513	278		-513	721
-512	278		-512	722
-511	278		-511	722
-510	278		-510	722
-509	278		-509	722
-508	278		-508	721
-507	278		-507	720
-506	278		-506	720
-505	278		-505	720
-504	278		-504	720
-503	278		-503	720
-502	278		-502	720
-501	280		-501	720
-500	280		-500	720
-499	280		-499	719
-498	280		-498	719
-497	280		-497	719
-496	280		-496	719
-495	280		-495	719
-494	280		-494	719
-493	280		-493	720
-492	280		-492	720
-491	280		-491	720
-490	280		-490	721
-489	280		-489	721
-488	280		-488	720
-487	280		-487	721
-486	280		-486	721
-485	280		-485	723
-484	280		-484	723
-483	280		-483	723
-482	280		-482	723
-481	280		-481	723
-480	280		-480	723
-479	280		-479	723
-478	280		-478	723
-477	280		-477	723
-476	280		-476	723
-475	280		-475	723
-474	280		-474	723
-473	280		-473	723
-472	280		-472	723
-471	280		-471	723
-470	280		-470	723
-469	279		-469	724
-468	279		-468	726
-467	279		-467	726
-466	279		-466	726
-465	279		-465	726
-464	279		-464	727
-463	279		-463	727
-462	279		-462	727
-461	279		-461	727
-460	280		-460	728
-459	281		-459	730
-458	284		-458	730
-457	284		-457	730
-456	284		-456	730
-455	286		-455	730
-454	286		-454	730
-453	286		-453	730
-452	288		-452	730
-451	288		-451	730
-450	288		-450	730
-449	288		-449	730
-448	287		-448	729
-447	287		-447	729
-446	287		-446	729
-445	288		-445	727
-444	288		-444	727
-443	288		-443	727
-442	288		-442	727
-441	288		-441	727
-440	288		-440	727
-439	288		-439	727
-438	288		-438	726
-437	288		-437	726
-436	288		-436	726
-435	288		-435	726
-434	288		-434	726
-433	288		-433	726
-432	288		-432	726
-431	288		-431	726
-430	288		-430	727
-429	288		-429	729
-428	288		-428	729
-427	288		-427	729
-426	288		-426	729
-425	288		-425	729
-424	288		-424	729
-423	288		-423	729
-422	288		-422	731
-421	288		-421	731
-420	288		-420	731
-419	288		-419	731
-418	288		-418	731
-417	288		-417	731
-416	288		-416	731
-415	288		-415	731
-414	288		-414	731
-413	288		-413	731
-412	288		-412	731
-411	288		-411	731
-410	291		-410	731
-409	292		-409	731
-408	292		-408	730
-407	292		-407	730
-406	293		-406	731
-405	293		-405	731
-404	293		-404	731
-403	293		-403	731
-402	295		-402	732
-401	295		-401	733
-400	295		-400	733
-399	295		-399	733
-398	295		-398	733
-397	295		-397	733
-396	294		-396	733
-395	294		-395	734
-394	294		-394	734
-393	294		-393	734
-392	294		-392	733
-391	294		-391	733
-390	294		-390	734
-389	294		-389	734
-388	295		-388	734
-387	295		-387	734
-386	295		-386	734
-385	295		-385	734
-384	295		-384	734
-383	295		-383	734
-382	295		-382	734
-381	295		-381	734
-380	295		-380	734
-379	295		-379	734
-378	295		-378	734
-377	295		-377	734
-376	295		-376	734
-375	295		-375	734
-374	295		-374	734
-373	295		-373	735
-372	295		-372	734
-371	295		-371	735
-370	295		-370	737
-369	295		-369	737
-368	295		-368	737
-367	295		-367	737
-366	295		-366	737
-365	295		-365	737
-364	295		-364	737
-363	297		-363	737
-362	297		-362	737
-361	297		-361	738
-360	297		-360	738
-359	297		-359	740
-358	297		-358	740
-357	297		-357	739
-356	297		-356	739
-355	297		-355	739
-354	297		-354	739
-353	297		-353	739
-352	297		-352	739
-351	297		-351	739
-350	296		-350	740
-349	296		-349	740
-348	296		-348	742
-347	296		-347	743
-346	296		-346	743
-345	296		-345	743
-344	296		-344	743
-343	296		-343	742
-342	296		-342	742
-341	296		-341	743
-340	296		-340	743
-339	296		-339	743
-338	297		-338	743
-337	298		-337	743
-336	298		-336	744
-335	298		-335	744
-334	299		-334	744
-333	298		-333	744
-332	298		-332	744
-331	298		-331	744
-330	298		-330	744
-329	298		-329	744
-328	300		-328	744
-327	300		-327	744
-326	300		-326	744
-325	300		-325	744
-324	300		-324	744
-323	300		-323	746
-322	300		-322	746
-321	302		-321	746
-320	302		-320	746
-319	302		-319	746
-318	303		-318	746
-317	304		-317	747
-316	304		-316	747
-315	304		-315	747
-314	304		-314	747
-313	304		-313	748
-312	304		-312	748
-311	305		-311	748
-310	305		-310	748
-309	305		-309	749
-308	305		-308	749
-307	305		-307	751
-306	304		-306	751
-305	305		-305	751
-304	305		-304	750
-303	305		-303	750
-302	305		-302	750
-301	305		-301	750
-300	307		-300	750
-299	307		-299	752
-298	307		-298	752
-297	307		-297	752
-296	307		-296	752
-295	307		-295	754
-294	307		-294	754
-293	307		-293	754
-292	307		-292	754
-291	309		-291	754
-290	311		-290	754
-289	311		-289	754
-288	311		-288	755
-287	311		-287	755
-286	313		-286	756
-285	313		-285	756
-284	313		-284	756
-283	315		-283	756
-282	315		-282	758
-281	315		-281	758
-280	315		-280	758
-279	315		-279	758
-278	315		-278	758
-277	315		-277	758
-276	315		-276	758
-275	315		-275	758
-274	315		-274	758
-273	315		-273	758
-272	315		-272	760
-271	317		-271	760
-270	317		-270	760
-269	317		-269	760
-268	317		-268	760
-267	318		-267	762
-266	318		-266	762
-265	318		-265	762
-264	318		-264	762
-263	318		-263	762
-262	318		-262	762
-261	318		-261	762
-260	318		-260	763
-259	321		-259	763
-258	321		-258	763
-257	321		-257	763
-256	321		-256	764
-255	321		-255	764
-254	321		-254	764
-253	322		-253	765
-252	322		-252	765
-251	322		-251	765
-250	322		-250	765
-249	322		-249	765
-248	322		-248	765
-247	322		-247	765
-246	322		-246	767
-245	322		-245	767
-244	324		-244	767
-243	324		-243	767
-242	324		-242	768
-241	324		-241	767
-240	324		-240	767
-239	325		-239	767
-238	325		-238	767
-237	326		-237	767
-236	326		-236	767
-235	326		-235	767
-234	326		-234	767
-233	326		-233	766
-232	326		-232	766
-231	327		-231	768
-230	327		-230	768
-229	327		-229	769
-228	328		-228	769
-227	328		-227	769
-226	328		-226	769
-225	328		-225	769
-224	328		-224	769
-223	328		-223	770
-222	328		-222	770
-221	328		-221	772
-220	328		-220	772
-219	328		-219	770
-218	328		-218	770
-217	328		-217	770
-216	328		-216	770
-215	328		-215	770
-214	329		-214	771
-213	329		-213	771
-212	329		-212	770
-211	330		-211	770
-210	333		-210	770
-209	333		-209	770
-208	334		-208	772
-207	334		-207	772
-206	334		-206	772
-205	335		-205	776
-204	338		-204	773
-203	338		-203	773
-202	338		-202	773
-201	339		-201	773
-200	339		-200	773
-199	339		-199	773
-198	339		-198	773
-197	339		-197	773
-196	340		-196	773
-195	340		-195	773
-194	340		-194	774
-193	343		-193	774
-192	343		-192	774
-191	343		-191	774
-190	343		-190	774
-189	345		-189	774
-188	345		-188	776
-187	345		-187	776
-186	346		-186	776
-185	348		-185	776
-184	348		-184	774
-183	349		-183	774
-182	349		-182	774
-181	349		-181	776
-180	349		-180	776
-179	353		-179	778
-178	356		-178	778
-177	357		-177	777
-176	357		-176	777
-175	357		-175	777
-174	357		-174	777
-173	357		-173	777
-172	357		-172	777
-171	357		-171	777
-170	357		-170	777
-169	357		-169	775
-168	358		-168	773
-167	358		-167	773
-166	358		-166	773
-165	359		-165	773
-164	361		-164	773
-163	363		-163	773
-162	365		-162	772
-161	366		-161	772
-160	366		-160	772
-159	366		-159	772
-158	366		-158	772
-157	366		-157	770
-156	366		-156	770
-155	366		-155	767
-154	367		-154	767
-153	367		-153	767
-152	367		-152	767
-151	367		-151	766
-150	367		-150	765
-149	367		-149	766
-148	369		-148	766
-147	369		-147	766
-146	370		-146	766
-145	370		-145	766
-144	370		-144	766
-143	371		-143	766
-142	372		-142	766
-141	372		-141	766
-140	372		-140	766
-139	372		-139	766
-138	372		-138	766
-137	373		-137	766
-136	373		-136	766
-135	373		-135	766
-134	373		-134	766
-133	373		-133	766
-132	373		-132	764
-131	373		-131	764
-130	373		-130	764
-129	375		-129	763
-128	376		-128	765
-127	376		-127	765
-126	377		-126	766
-125	377		-125	766
-124	378		-124	766
-123	378		-123	766
-122	378		-122	766
-121	378		-121	766
-120	377		-120	765
-119	377		-119	765
-118	377		-118	765
-117	381		-117	764
-116	381		-116	764
-115	381		-115	765
-114	383		-114	765
-113	383		-113	762
-112	384		-112	763
-111	384		-111	763
-110	384		-110	762
-109	385		-109	762
-108	385		-108	762
-107	386		-107	761
-106	389		-106	761
-105	389		-105	759
-104	390		-104	758
-103	390		-103	760
-102	390		-102	760
-101	390		-101	759
-100	394		-100	760
-99	397		-99	760
-98	397		-98	762
-97	399		-97	765
-96	402		-96	765
-95	402		-95	765
-94	402		-94	761
-93	402		-93	761
-92	402		-92	761
-91	403		-91	761
-90	404		-90	761
-89	406		-89	761
-88	406		-88	761
-87	406		-87	761
-86	407		-86	762
-85	407		-85	762
-84	407		-84	763
-83	407		-83	765
-82	407		-82	765
-81	407		-81	765
-80	409		-80	765
-79	414		-79	765
-78	414		-78	765
-77	415		-77	765
-76	415		-76	765
-75	416		-75	765
-74	416		-74	764
-73	416		-73	764
-72	416		-72	764
-71	416		-71	764
-70	416		-70	764
-69	416		-69	764
-68	416		-68	765
-67	416		-67	765
-66	416		-66	764
-65	418		-65	765
-64	420		-64	766
-63	420		-63	764
-62	422		-62	765
-61	422		-61	763
-60	423		-60	763
-59	425		-59	763
-58	425		-58	763
-57	425		-57	763
-56	426		-56	762
-55	426		-55	762
-54	427		-54	762
-53	427		-53	762
-52	427		-52	762
-51	427		-51	762
-50	428		-50	759
-49	428		-49	759
-48	428		-48	759
-47	429		-47	759
-46	431		-46	759
-45	431		-45	761
-44	431		-44	761
-43	431		-43	760
-42	431		-42	759
-41	431		-41	759
-40	433		-40	763
-39	434		-39	763
-38	434		-38	764
-37	435		-37	763
-36	435		-36	762
-35	437		-35	762
-34	437		-34	763
-33	437		-33	763
-32	438		-32	764
-31	439		-31	765
-30	439		-30	765
-29	439		-29	765
-28	439		-28	767
-27	439		-27	767
-26	439		-26	767
-25	439		-25	767
-24	440		-24	767
-23	442		-23	767
-22	442		-22	767
-21	442		-21	766
-20	443		-20	767
-19	444		-19	767
-18	444		-18	767
-17	445		-17	767
-16	445		-16	768
-15	445		-15	768
-14	445		-14	769
-13	445		-13	770
-12	446		-12	770
-11	448		-11	770
-10	448		-10	769
-9	449		-9	770
-8	449		-8	771
-7	449		-7	771
-6	448		-6	770
-5	448		-5	769
-4	448		-4	768
-3	448		-3	770
-2	448		-2	770
[truncated: 2,002 more rows]

## Sheet: g
Gene ontology pathway	(-LOG10(FDR))
defense response to virus	2.57512
negative regulation of extrinsic apoptotic signaling pathway	2.43297
innate immune response	2.18977
negative regulation of immune system process	1.81531
cellular response to interferon-gamma	1.65758
negative regulation of viral genome replication	1.51428
positive regulation of response to cytokine stimulus	1.47756
negative regulation of T cell apoptotic process	1.44855
positive regulation of I-kappaB kinase/NF-kappaB signaling	1.37263
