# Supplementary material for: Phase transition of WTAP regulates m6A modification of interferon-stimulated genes
Source: eLife. 2025 May 27;13:RP100601. doi: 10.7554/eLife.100601 (PMC12113268; doi:10.7554/eLife.100601)
Supplement: Figure 3—source data 1. [file elife-100601-fig3-data1.xlsx]

## Sheet: c
Gene ontology pathway	(-LOG10(FDR))
inflammatory response	6.84771
cellular response to interferon-gamma	5.24109
monocyte chemotaxis	3.57025
regulation of leukocyte chemotaxis	3.42366
neutrophil chemotaxis	3.23433
positive regulation of MAPK cascade	3.03058
positive regulation of apoptotic process	2.95078
neutrophil degranulation	2.86012
eosinophil chemotaxis	2.82102
positive regulation of interleukin-8 production	2.57025

## Sheet: d
IFIT1
	GFPsgRNA		WTAPsgRNA#2
0	0.94097	1.05903	0.867392	1.13261
6	2.8317	2.91726	4.29323	4.29098
12	2.73426	2.55909	3.88452	3.89672
IFIT2
	GFPsgRNA		WTAPsgRNA#2
0	0.952717	1.04728	0.879856	1.12014
6	7.70409	8.51833	11.0265	11.2733
12	8.5182	8.06145	9.00685	9.35944
OAS1
	GFPsgRNA		WTAPsgRNA#2
0	0.972804	1.0272	0.916295	1.0837
6	2.00707	2.02276	2.69412	2.81733
12	2.00705	2.06725	2.71241	2.65578
OAS2
	GFPsgRNA		WTAPsgRNA#2
0	0.979706	1.02029	1.10006	0.899938
6	1.92771	1.7041	2.32703	2.35231
12	1.68542	1.66712	2.68402	2.36293

## Sheet: f
	all m6A sites			WT>KO m6A sites
0	0.000192686		0	0.000205592
1	0.000207606		1	0.000220106
2	0.000222691		2	0.000235022
3	0.000237851		3	0.000250298
4	0.000252993		4	0.000265892
5	0.00026803		5	0.000281757
6	0.000282879		6	0.000297846
7	0.000297462		7	0.000314109
8	0.000311707		8	0.000330497
9	0.000325553		9	0.000346959
10	0.000338946		10	0.000363443
11	0.00035184		11	0.000379899
12	0.000364202		12	0.000396276
13	0.000376004		13	0.000412523
14	0.000387228		14	0.000428593
15	0.000397864		15	0.000444435
16	0.000407907		16	0.000460004
17	0.00041736		17	0.000475252
18	0.00042623		18	0.000490136
19	0.000434526		19	0.000504611
20	0.000442263		20	0.000518634
21	0.000449457		21	0.000532163
22	0.000456127		22	0.000545158
23	0.000462293		23	0.000557579
24	0.000467977		24	0.000569386
25	0.000473202		25	0.000580541
26	0.000477994		26	0.000591008
27	0.000482381		27	0.000600749
28	0.000486393		28	0.000609731
29	0.000490063		29	0.000617919
30	0.000493425		30	0.000625281
31	0.000496518		31	0.000631786
32	0.000499381		32	0.000637408
33	0.000502059		33	0.000642119
34	0.000504593		34	0.000645899
35	0.000507028		35	0.000648726
36	0.000509407		36	0.000650587
37	0.000511773		37	0.000651471
38	0.000514164		38	0.00065137
39	0.000516615		39	0.000650284
40	0.000519156		40	0.000648219
41	0.000521809		41	0.000645184
42	0.00052459		42	0.000641198
43	0.000527507		43	0.000636284
44	0.000530559		44	0.000630473
45	0.000533736		45	0.000623805
46	0.000537021		46	0.000616324
47	0.000540387		47	0.000608085
48	0.000543801		48	0.000599149
49	0.000547226		49	0.000589584
50	0.000550617		50	0.000579466
51	0.000553928		51	0.000568879
52	0.000557112		52	0.000557913
53	0.000560121		53	0.000546666
54	0.000562912		54	0.000535244
55	0.000565443		55	0.000523755
56	0.000567683		56	0.000512318
57	0.000569607		57	0.000501055
58	0.000571198		58	0.000490093
59	0.000572453		59	0.000479567
60	0.000573381		60	0.000469613
61	0.000574005		61	0.000460374
62	0.000574361		62	0.000451994
63	0.000574502		63	0.000444624
64	0.000574493		64	0.000438414
65	0.000574415		65	0.000433519
66	0.000574365		66	0.000430094
67	0.000574452		67	0.000428298
68	0.000574799		68	0.000428288
69	0.00057554		69	0.000430224
70	0.000576823		70	0.000434262
71	0.000578807		71	0.00044056
72	0.000581661		72	0.000449273
73	0.000585565		73	0.000460552
74	0.000590708		74	0.000474546
75	0.00059729		75	0.000491397
76	0.000605522		76	0.000511243
77	0.000615622		77	0.000534212
78	0.00062782		78	0.000560426
79	0.000642355		79	0.000589995
80	0.000659473		80	0.000623018
81	0.000679426		81	0.000659581
82	0.000702472		82	0.000699755
83	0.000728868		83	0.000743595
84	0.000758868		84	0.000791137
85	0.000792718		85	0.000842402
86	0.000830647		86	0.000897385
87	0.000872863		87	0.000956064
88	0.000919547		88	0.00101839
89	0.000970838		89	0.0010843
90	0.00102683		90	0.0011537
91	0.00108757		91	0.00122646
92	0.00115304		92	0.00130246
93	0.00122314		93	0.00138153
94	0.00129773		94	0.00146348
95	0.00137658		95	0.00154811
96	0.00145939		96	0.00163519
97	0.00154577		97	0.00172448
98	0.0016353		98	0.00181572
99	0.00172746		99	0.00190864
100	0.00182172		100	0.00200295
101	0.00191746		101	0.00209837
102	0.00201408		102	0.00219459
103	0.00211094		103	0.00229131
104	0.00220741		104	0.00238825
105	0.00230287		105	0.00248509
106	0.00239673		106	0.00258155
107	0.00248845		107	0.00267735
108	0.00257752		108	0.00277222
109	0.00266352		109	0.00286588
110	0.00274608		110	0.00295811
111	0.00282492		111	0.00304866
112	0.00289982		112	0.00313733
113	0.00297066		113	0.00322391
114	0.00303736		114	0.00330824
115	0.00309994		115	0.00339016
116	0.00315847		116	0.00346953
117	0.00321308		117	0.00354622
118	0.00326394		118	0.00362016
119	0.00331127		119	0.00369126
120	0.00335531		120	0.00375948
121	0.00339633		121	0.00382476
122	0.00343459		122	0.00388711
123	0.00347039		123	0.00394653
124	0.003504		124	0.00400305
125	0.00353569		125	0.00405672
126	0.00356573		126	0.0041076
127	0.00359436		127	0.0041558
128	0.00362182		128	0.00420143
129	0.00364832		129	0.00424461
130	0.00367405		130	0.00428551
131	0.00369921		131	0.0043243
132	0.00372396		132	0.00436118
133	0.00374844		133	0.00439636
134	0.00377279		134	0.00443009
135	0.00379714		135	0.0044626
136	0.0038216		136	0.00449417
137	0.00384626		137	0.00452508
138	0.00387121		138	0.00455562
139	0.00389652		139	0.0045861
140	0.00392227		140	0.00461681
141	0.00394849		141	0.00464806
142	0.00397524		142	0.00468016
143	0.00400253		143	0.00471342
144	0.00403039		144	0.00474811
145	0.00405882		145	0.00478452
146	0.00408781		146	0.0048229
147	0.00411735		147	0.00486349
148	0.00414743		148	0.0049065
149	0.004178		149	0.00495211
150	0.00420904		150	0.00500046
151	0.00424053		151	0.00505167
152	0.00427243		152	0.00510581
153	0.00430474		153	0.00516293
154	0.00433745		154	0.00522301
155	0.00437057		155	0.00528601
156	0.00440413		156	0.00535185
157	0.00443818		157	0.00542039
158	0.0044728		158	0.00549149
159	0.00450809		159	0.00556495
160	0.00454419		160	0.00564053
161	0.00458124		161	0.00571797
162	0.00461944		162	0.00579701
163	0.00465899		163	0.00587732
164	0.00470014		164	0.0059586
165	0.00474312		165	0.00604051
166	0.00478823		166	0.00612272
167	0.00483573		167	0.00620487
168	0.00488592		168	0.00628664
169	0.00493909		169	0.00636768
170	0.00499553		170	0.00644768
171	0.00505552		171	0.00652631
172	0.00511931		172	0.00660329
173	0.00518712		173	0.00667832
174	0.00525914		174	0.00675116
175	0.00533551		175	0.00682154
176	0.00541631		176	0.00688927
177	0.00550155		177	0.00695412
178	0.00559117		178	0.00701593
179	0.00568501		179	0.00707452
180	0.00578281		180	0.00712974
181	0.00588421		181	0.00718147
182	0.00598874		182	0.00722959
183	0.00609582		183	0.00727399
184	0.00620473		184	0.00731457
185	0.00631466		185	0.00735124
186	0.00642469		186	0.00738392
187	0.0065338		187	0.00741252
188	0.00664087		188	0.00743698
189	0.00674476		189	0.00745722
190	0.00684425		190	0.00747318
191	0.00693813		191	0.00748477
192	0.00702519		192	0.00749195
193	0.00710427		193	0.00749464
194	0.00717429		194	0.00749281
195	0.00723425		195	0.00748639
196	0.0072833		196	0.00747536
197	0.00732074		197	0.00745967
198	0.00734605		198	0.00743933
199	0.0073589		199	0.00741431
200	0.00735915		200	0.00738464
201	0.00734686		201	0.00735033
202	0.00732232		202	0.00731145
203	0.00728598		203	0.00726806
204	0.00723847		204	0.00722023
205	0.00718059		205	0.00716808
206	0.00711325		206	0.00711174
207	0.00703749		207	0.00705135
208	0.00695439		208	0.00698707
209	0.00686509		209	0.00691909
210	0.00677075		210	0.00684762
211	0.00667249		211	0.00677285
212	0.00657142		212	0.00669503
213	0.00646856		213	0.00661439
214	0.00636486		214	0.00653119
215	0.00626117		215	0.00644567
216	0.00615826		216	0.00635809
217	0.00605676		217	0.00626873
218	0.00595721		218	0.00617785
219	0.00586005		219	0.0060857
220	0.00576562		220	0.00599255
221	0.00567416		221	0.00589866
222	0.00558586		222	0.00580428
223	0.00550084		223	0.00570963
224	0.00541914		224	0.00561497
225	0.00534082		225	0.00552051
226	0.00526586		226	0.00542647
227	0.00519425		227	0.00533304
228	0.00512596		228	0.00524042
229	0.00506099		229	0.00514878
230	0.00499929		230	0.00505828
231	0.00494086		231	0.00496907
232	0.00488569		232	0.00488129
233	0.00483376		233	0.00479505
234	0.00478507		234	0.00471047
235	0.00473959		235	0.00462763
236	0.0046973		236	0.0045466
237	0.00465815		237	0.00446746
238	0.0046221		238	0.00439024
239	0.00458904		239	0.00431497
240	0.00455886		240	0.00424168
241	0.00453142		241	0.00417036
242	0.00450654		242	0.00410102
243	0.00448404		243	0.00403363
244	0.00446367		244	0.00396816
245	0.00444521		245	0.00390456
246	0.00442841		246	0.0038428
247	0.004413		247	0.0037828
248	0.00439875		248	0.00372451
249	0.00438542		249	0.00366785
250	0.00437279		250	0.00361276
251	0.00436069		251	0.00355915
252	0.00434897		252	0.00350694
253	0.00433752		253	0.00345605
254	0.0043263		254	0.0034064
255	0.00431527		255	0.00335791
256	0.00430448		256	0.0033105
257	0.00429398		257	0.00326408
258	0.00428387		258	0.00321857
259	0.00427427		259	0.0031739
260	0.00426532		260	0.00312999
261	0.00425715		261	0.00308676
262	0.00424989		262	0.00304414
263	0.00424364		263	0.00300203
264	0.00423847		264	0.00296037
265	0.00423442		265	0.00291906
266	0.00423145		266	0.00287803
267	0.00422947		267	0.00283718
268	0.00422832		268	0.00279643
269	0.00422778		269	0.00275567
270	0.00422751		270	0.00271482
271	0.00422715		271	0.00267376
272	0.00422622		272	0.00263239
273	0.0042242		273	0.00259062
274	0.00422049		274	0.00254832
275	0.00421444		275	0.00250539
276	0.00420538		276	0.00246173
277	0.00419257		277	0.00241724
278	0.00417528		278	0.00237181
279	0.00415279		279	0.00232537
280	0.00412436		280	0.00227782
281	0.00408932		281	0.0022291
282	0.00404703		282	0.00217916
283	0.00399692		283	0.00212794
284	0.0039385		284	0.00207542
285	0.0038714		285	0.0020216
286	0.00379534		286	0.00196647
287	0.00371019		287	0.00191008
288	0.00361593		288	0.00185246
289	0.00351272		289	0.00179369
290	0.00340084		290	0.00173385
291	0.00328074		291	0.00167304
292	0.00315301		292	0.0016114
293	0.00301838		293	0.00154906
294	0.00287771		294	0.00148618
295	0.00273197		295	0.00142292
296	0.00258223		296	0.00135947
297	0.00242964		297	0.00129602
298	0.00227539		298	0.00123275
299	0.00212069		299	0.00116988
300	0.00196675		300	0.00110759

## Sheet: i
IFIT1
GFPsgRNA			WTAPsgRNA#2
0.7344	0.2456	0.4247	0.2198	0.0672	0.1215
IFIT2
GFPsgRNA			WTAPsgRNA#2
0.2496	0.3776	0.2842	0.154918	0.044872	0.077191
OAS1
GFPsgRNA			WTAPsgRNA#2
0.0159	0.0268	0.0206	0.01	0.0081	0.009
OAS2
GFPsgRNA			WTAPsgRNA#2
0.0244	0.0482	0.0343	0.0084	0.0019	0.004

## Sheet: j
IFIT1
Act D (h)	GFPsgRNA			WTAPsgRNA#1			WTAPsgRNA#2
0	1	1	1	1	1	1	1	1	1
4	0.494828	0.363493	0.343885	0.790041	0.739694	0.923382	0.675955	0.790041	0.809442
8	0.078836	0.145592	0.10083	0.598739	0.484645	0.809442	0.424842	0.598739	0.622006
IFIT2
Act D (h)	GFPsgRNA			WTAPsgRNA#1			WTAPsgRNA#2
0	1	1	1	1	1	1	1	1	1
4	0.439825	0.287175	0.424842	0.646176	0.564482	0.78187	0.646176	0.641713	0.65293
8	0.079937	0.123279	0.142595	0.45376	0.385553	0.671286	0.45376	0.447513	0.517632
OAS1
Act D (h)	GFPsgRNA			WTAPsgRNA#1			WTAPsgRNA#2
0	1	1	1	1	1	1	1.01748	0.986233	1
4	0.64842	0.479632	0.588453	1.04247	0.843816	0.859754	1.12506	1.14076	1.13288
8	0.256139	0.243164	0.266093	0.570534	0.586574	0.697558	0.750137	0.669069	0.687879
OAS2
Act D (h)	GFPsgRNA			WTAPsgRNA#1			WTAPsgRNA#2
0	1	1	1	1	1	1	0.982821	1	1
4	0.539614	0.488016	0.554785	1.07177	0.885768	0.826986	1.15269	1.23542	1.07549
8	0.223756	0.262429	0.315344	0.516222	0.637751	0.859199	0.765493	0.685135	0.752342

## Sheet: k
IFIT1
	GFPsgRNA			WTAPsgRNA#1			WTAPsgRNA#2
0	0.97	1.03	1	1.65	1.47	1.25	1.19	1.52	1.35
6	4.08	4.39	4.24	10.09	10.23	6.77	9.85	10.56	10.2
12	4.16	3.54	3.84	12.55	9.38	8.54	9.13	9.68	9.4
24	3.17	3.61	3.38	6.75	6.89	5.3	5.24	7.11	6.11
IFIT2
	GFPsgRNA			WTAPsgRNA#1			WTAPsgRNA#2
0	0.93	1.07	1	2.32	0.92	1.46	1.57	2.22	1.87
6	11.14	11.73	11.43	51	29.81	38.99	32.06	35.57	33.77
12	12.4	11.61	12	34	31.5	32.73	22.28	26.96	24.5
24	7.22	7.85	7.53	8.95	6.83	7.82	8.18	12.23	10
OAS1
	GFPsgRNA			WTAPsgRNA#1			WTAPsgRNA#2
0	0.36	2.78	1	4.06	1.18	2.18	4.38	5.19	4.77
6	4.82	6.66	5.67	36.89	9.45	18.67	12.25	13.41	12.82
12	5.12	8	6.4	18.83	10.06	13.76	13.32	16.45	14.8
24	8.97	4.21	6.15	10.09	5.5	7.45	7.59	11.2	9.22
OAS2
	WT			WTAPsgRNA#1			WTAPsgRNA#2
0	0.32	3.14	1	3.86	1.39	2.31	3.74	5.04	4.34
6	3.97	7.4	5.42	31.94	11.1	18.83	10.29	12.19	11.2
12	3.98	8.33	5.76	25.06	10.68	16.36	10.68	14.3	12.36
24	6.9	4.12	5.33	7.9	6.33	7.07	6.05	10.25	7.88
