# Supplementary material for: Phase transition of WTAP regulates m6A modification of interferon-stimulated genes
Source: eLife. 2025 May 27;13:RP100601. doi: 10.7554/eLife.100601 (PMC12113268; doi:10.7554/eLife.100601)
Supplement: Figure 4—figure supplement 1—source data 3. [file elife-100601-fig4-figsupp1-data3.xlsx]

## Sheet: a
IFIT1
	UT			Hex
12	0.1714	0.1928	0.1818	0.0014	0.0075	0.0033
24	0.2466	0.2415	0.244	0.0561	0.0002	0.0031
IFIT2
	UT			Hex
12	0.0813	0.1708	0.1179	0.0011	0.0011	0.0011
24	0.1502	0.1982	0.1725	0.000883	0.024265	0.004629
OAS1
	UT			Hex
12	0.0703	0.0634	0.0668	0.0137	0.0181	0.0157
24	0.1022	0.0961	0.0991	0.042	0.0102	0.0207
OAS2
	UT			Hex
12	0.0254	0.0206	0.0229	0.0002	0.0005	0.0004
24	0.0616	0.0698	0.0656	0.0004	0.0004	0.0004

## Sheet: b
IFIT1
	UT			Hex
12	0.0311	0.0794	0.0497	0.0352	0.0421	0.0385
24	0.117	0.1502	0.1326	0.0251	0.0751	0.0434
IFIT2
	UT			Hex
12	0.1138	0.1012	0.1073	0.0007	0.0004	0.0005
24	0.1774	0.1655	0.1714	0.0061	0.008	0.007
OAS1
	UT			Hex
12	0.0205	0.0228	0.0216	0.0061	0.0052	0.0057
24	0.0906	0.0788	0.0845	0.0068	0.0086	0.0077
OAS2
	UT			Hex
12	0.0954	0.1199	0.107	0.005	0.005	0.005
24	0.2184	0.1513	0.1818	0.0316	0.0316	0.0316

## Sheet: c
IFIT1
Act D (h)	WT, UT			WT, hex			WTAPsgRNA, UT			WTAPsgRNA, hex
0	1	1	1	1	1	1	1	1	1	1	1	1
4	0.566442	0.363493	0.48	1.26576	1.04608	1.05	0.784584	0.739694	0.81	1.32869	1.03168	1.03
8	0.171348	0.145592	0.24	0.655197	0.532185	0.53	0.421908	0.484645	0.62	0.917004	0.680657	0.68
IFIT2
Act D (h)	WT, UT			WT, hex			WTAPsgRNA, UT			WTAPsgRNA, hex
0	1	1	1	1	1	1	1	1	1	1	1	1
4	0.429283	0.29	0.4	1.07177	0.835088	0.84	0.586417	0.84	0.65	1.05702	0.879649	0.88
8	0.15283	0.12	0.22	0.512278	0.481297	0.48	0.337978	0.48	0.52	0.702222	0.535887	0.54
OAS1
Act D (h)	WT, UT			WT, hex			WTAPsgRNA, UT			WTAPsgRNA, hex
0	1	1	1	1	1	1.01	1	1.01396	1.01	1	1	1
4	0.89	0.817902	0.734584	1.01396	1.01396	1.02	1.13288	1.12506	1.13	1.05336	1.20999	1.13
8	0.61	0.35233	0.282241	0.843816	0.843816	0.83	0.920188	0.946058	0.95	0.734584	0.942785	0.84
OAS2
Act D (h)	WT, UT			WT, hex			WTAPsgRNA, UT			WTAPsgRNA, hex
0	1	1	1	1	1	1	1	1	1	1	1	1
4	0.885768	0.832199	0.86	1.07177	1.07549	1.24	1.1607	0.929805	1.05	1.04608	1.16878	1.11
8	0.315344	0.400535	0.36	0.989657	0.784584	1.14	1.03168	0.685391	0.86	0.673617	0.982821	0.83

## Sheet: d
IFIT1
IFN-β (h)	GFPsgRNA, NC			GFPsgRNA, PPP4-KD			WTAPsgRNA, NC			WTAPsgRNA, PPP4-KD
0	0.54	0.62	1	0.79	1.09	1.47	2.59	2.69	2.7	3.22	3.23	3.43
6	4.36	7.3	6.15	9.37	8.19	8.32	7.38	12.63	8.46	13.3	11.42	9.54
12	3.98	4.21	4.32	6.96	5.67	5.63	12.24	9.98	8.91	12.94	8.9	8.26
IFIT2
IFN-β (h)	GFPsgRNA, NC			GFPsgRNA, PPP4-KD			WTAPsgRNA, NC			WTAPsgRNA, PPP4-KD
0	0.68	2.43	1	1.15	1.1	1.94	4.25	4.27	5.39	6.98	6.01	7.94
6	11.03	12.45	13.52	18.17	18.81	19.45	29.21	22.45	30.77	52.65	36.34	35.26
12	7.03	5.87	6.82	9.6	7.94	8.37	17.67	22.68	24.62	33.9	13.72	18.66

## Sheet: e
IFIT1
fostriecin	0			2			5
0	0.780967	1.24257	1.03049	0.993092	0.959264	1.04972	1.01162	0.97041	1.01866
6	6.46806	6.46806	8.24394	11.7942	10.9283	10.7034	16.8733	16.8733	16.8733
12	12.5824	11.7398	11.9037	22.0087	23.1029	23.2636	23.8624	25.0487	25.753
IFIT2
	WT			2			5
0	0.983957	0.983957	1.03288	1.01631	0.974905	1.00928	1.02101	0.986233	0.993092
6	8.49531	7.9264	8.20593	11.0298	10.5074	10.2912	13.737	13.3614	13.2691
12	10.9031	11.5248	11.2096	14.2544	14.5539	14.6551	26.3549	27.0958	27.8576
OAS1
	WT			2			5
0	1.00696	1.16473	0.852635	1.03049	1.01631	0.954842	0.988514	0.935191	1.08173
6	5.73582	5.65685	6.58873	13.961	14.0581	14.4534	12.3234	11.4982	12.4955
12	15.2422	15.7797	15.1369	24.9909	24.9909	24.8183	35.0984	37.0996	35.0984
OAS2
	WT			2			5
0	0.997692	1.04729	0.95705	0.954842	0.99539	1.05215	0.986233	1.02811	0.986233
6	4.21831	4.58419	4.71307	11.2615	11.4982	12.2383	13.3614	13.9288	13.6422
12	10.2437	10.315	9.75855	20.0195	20.1587	19.4721	25.9921	26.7228	25.6342
