# Supplementary material for: Phase transition of WTAP regulates m6A modification of interferon-stimulated genes
Source: eLife. 2025 May 27;13:RP100601. doi: 10.7554/eLife.100601 (PMC12113268; doi:10.7554/eLife.100601)
Supplement: Figure 4—source data 1. [file elife-100601-fig4-data1.xlsx]

## Sheet: a
IFIT1
	GFPsgRNA			WTAPsgRNA#2
UT	0.588513	0.609266	0.5988	0.177101	0.138951	0.15687
1，6-hex	0.322003	0.196847	0.251764	0.176183	0.200288	0.187849
IFIT2
	GFPsgRNA			WTAPsgRNA#2
UT	0.2722	0.3849	0.3237	0.0407	0.0465	0.0435
hex	0.0846	0.0582	0.0702	0.0599	0.0463	0.0527
OAS1
	GFPsgRNA			WTAPsgRNA#2
UT	0.0233	0.0334	0.0279	0.0049	0.0043	0.0046
hex	0.0082	0.0037	0.0055	0.0044	0.0075	0.0057
OAS2
	GFPsgRNA			WTAPsgRNA#2
UT	0.53776	0.5606	0.54906	0.02886	0.03008	0.02946
hex	0.03396	0.03303	0.03349	0.01323	0.02683	0.01884

## Sheet: b
IFIT1
scr siRNA			PPP4 siRNA
0.540798	0.339895	0.428736	0.0411821	0.0253506	0.0323108
IFIT2
scr siRNA			PPP4 siRNA
0.205235	0.216937	0.211005	0.00965405	0.0121353	0.0108238
OAS1
scr siRNA			PPP4 siRNA
0.025544	0.028343	0.026907	0.00118504	0.00347	0.00202783
OAS2
scr siRNA			PPP4 siRNA
0.076153	0.075153	0.076103	6.38e-05	6.08e-05	7.58e-05

## Sheet: c
IFIT1
ut	fos2	fos5
0.268	0.104	0.015
0.423	0.052	0.042
0.481	0.092	0.011
IFIT 2
ut	fos2	fos5
0.273	0.014	0.011
0.313	0.021	0.006
0.284	0.05	0.014
OAS1
ut	fos2	fos5
0.023	0.0014	0.0033
0.036	0.0012	0.0027
0.03	0.0068	0.00194
OAS2
ut	fos2	fos5
0.069	0.015	0.003
0.074	0.011	0.0026
0.079	0.008	0.0048

## Sheet: d
IFIT1
GFPsgRNA			WTAPsgRNA			WTAP WT			WTAP 5ST-D			WTAP 5ST-A
0.307794	0.48634	0.386901	0.102595	0.150208	0.12414	0.419004	0.564497	0.48634	0.122431	0.28918	0.188161	0.433062	0.337426	0.382265
IFIT2
GFPsgRNA			WTAPsgRNA			WTAP WT			WTAP 5ST-D			WTAP 5ST-A
0.209502	0.212427	0.333333	0.120327	0.120327	0.117851	0.230852	0.267023	0.337986	0.18751	0.164372	0.19958	0.30096	0.329339	0.31483
OAS1
GFPsgRNA			WTAPsgRNA			WTAP WT			WTAP 5ST-D			WTAP 5ST-A
0.026518	0.027263	0.021689	0.006959	0.010403	0.00625	0.02661	0.027358	0.031535	0.012371	0.005791	0.012371	0.032934	0.031592	0.032256
OAS2
GFPsgRNA			WTAPsgRNA			WTAP WT			WTAP 5ST-D			WTAP 5ST-A
0.343894	0.316229	0.371141	0.007652	0.00314	0.000222	0.260623	0.444433	0.443838	0.029874	0.024434	0.027017	0.568423	0.590177	0.445976

## Sheet: e
IFIT1
	UT			hex
wt	0.1317	0.1084	0.1133	0.035	0.0534	0.0066
5d	0.0565	0.0741	0.0617	0.0741	0.0822	0.0792
5a	0.1195	0.1246	0.1179	0.0371	0.0595	0.0409
IFIT2
	UT			hex
wt	0.2298	0.3785	0.42	0.0056	0.1786	0.0596
5d	0.0421	0.0366	0.04	0.0463	0.0607	0.0561
5a	0.3168	0.2777	0.2849	0.0449	0.0545	0.0366
OAS1
	UT			hex
wt	0.0513	0.0509	0.0473	0.0048	0.0108	0.0147
5d	0.0217	0.0309	0.0375	0.0218	0.0286	0.0111
5a	0.0607	0.0698	0.0639	0.0112	0.0167	0.0192
OAS2
	UT			hex
wt	0.4229	0.3364	0.6807	0.048	0.0308	0.0763
5d	0.1065	0.0507	0.0349	0.0106	0.0597	0.0176
5a	0.4714	0.3004	0.5267	0.0303	0.0931	0.0128
