# Supplementary material for: Phase transition of WTAP regulates m6A modification of interferon-stimulated genes
Source: eLife. 2025 May 27;13:RP100601. doi: 10.7554/eLife.100601 (PMC12113268; doi:10.7554/eLife.100601)
Supplement: Figure 5—figure supplement 1—source data 3. [file elife-100601-fig5-figsupp1-data3.xlsx]

## Sheet: b
	IFN treated/untreated
WTAP	1.11342	0.929805	2.01391
METTL3	0.798298	1.20164	1.44894
METTL14	0.837987	1.79	1.43893
VIRMA	0.666649	2.37019	1.3
RBM15	0.739694	0.726986	0.976032
RBM15B	0.690159	0.71	1.10957
ZC3H13	0.680657	1.34257	1.02811
HAKAI	1.03168	1.25701	1.38032
YTHDC1	0.820742	0.898132	1.29
YTHDF1	0.80107	0.972655	1.36604
YTHDF2	0.65	0.82932	0.882703
YTHDF3	0.879649	1.14	1.38032
FTO	0.895025	0.692555	1.95206
ALKBH5	0.86	0.411796	0.385553
