# Supplementary material for: Phase transition of WTAP regulates m6A modification of interferon-stimulated genes
Source: eLife. 2025 May 27;13:RP100601. doi: 10.7554/eLife.100601 (PMC12113268; doi:10.7554/eLife.100601)
Supplement: Figure 5—source data 3. [file elife-100601-fig5-data3.xlsx]

## Sheet: d
IFIT1
WT			WTAPsgRNA
0.014298	0.009303	0.011533	6.58545e-09	7.1072e-09	6.84135e-09
IFIT2
WT			WTAPsgRNA
0.012447	0.009971	0.01114	7.83146e-09	7.72364e-09	7.77736e-09
OAS1
WT			WTAPsgRNA
0.000869	0.000701	0.000781	2.70823e-08	2.67095e-08	2.68953e-08
OAS2
WT			WTAPsgRNA
0.000244	0.000492	0.000347	3.04692e-08	3.04692e-08	3.04692e-08
								F

## Sheet: g
WTAP-STAT1	ut	ifn 1h	hex 1h
pearson coefficiency	0.12	0.69	0.32
	0.11	0.7	0.41
	0.07	0.51	0.38
	0.13	0.47	0.23
	0.26	0.48	0.01
	0.38	0.55	0.14
	0.12	0.57	0.23
	0.38	0.6	0.58
	0.34	0.53	0.2
	0.24	0.66	0.34
	0.3	0.62	0.41
	0.27	0.55	0.31
	0.3	0.72	0.43
	0.22	0.55	0.33
	0.07	0.44	0.25
	0.11	0.67	0.08
	0.08	0.56	0.28
	0.15	0.62	0.17
	0.33	0.64	0.31
	0.09	0.55	0.53
	0.3	0.6	0.47
	0.14	0.46	0.36
	0.17	0.55	0.54
	0.42	0.64	0.38
	0.2	0.5	0.38
	0.36	0.41	0.36
	0.18	0.56	0.01
	0.1	0.26	0.52
	0.26	0.53	0.46
	0.31	0.63	0.27
	0.3	0.19	0.22
	0.26	0.75	0.34
	0.42	0.37	0.33
	0.3	0.48	0.21
	0.17	0.37	0.11
	0.15	0.57	0.17
	0.25	0.64	0.26
	0.23	0.67	0.43
	0.18	0.51	0.33
	0.26	0.42	0.17
	0.34	0.58	0.17
	0.45	0.63	0.19
	0.32	0.72	0.27
	0.28	0.45	0.26
	0.31	0.67	0.15
	0.27	0.64	0.18
	0.25	0.34	0.34
	0.08	0.62	0.41
	0.16	0.72	0.37
	0.13	0.37	0.22
	0.24	0.55	0.3
	0.15	0.58	0.41
	0.17	0.52	0.31
	0.42	0.5	0.18
	0.36	0.63	0.2
	0.31	0.67	0.39
	0.26	0.73	0.32
	0.3	0.49	0.11
	0.14	0.57	0.42
	0.07	0.63	0.15
	0.09	0.73	0.31
	0.07	0.68	0.48
	0.35	0.52	0.36
	0.25	0.66	0.41
	0.23	0.73	0.33
	0.46	0.65	0.36
	0.09	0.55	0.36
	0.33	0.72	0.42
	0.32	0.53	0.45
	0.45	0.53	0.24
	0.45	0.61	0.32
	0.34	0.5	0.39
	0.36	0.57	0.45
	0.22	0.6	0.41
	0.27	0.51	0.35
	0.25	0.53	0.35
	0.25	0.64	0.33
	0.33	0.72	0.26
	0.15	0.54	0.33
	0.17	0.55	0.45

## Sheet: i
GFP-STAT1
Group	1	2	3	4	5	6	7
	30.278	0	0	0	47.533	55.04	33.438
	39.857	0	0	0	39.562	54.8	36.533
	40.5	0	0	0	45.556	45.222	41.85
	55.75	0	0	0	31.111	38.35	28.881
	53.7	0	0	0	29.5	42.259	31.583
	46.806	0	0	0	32	48.8	38.062
	40.188	0	0	0	36	34.75	54.075
	23.8	0	0	0	28.333	42.75	40.767
	55.2	0	0	0	36	41.25	51.938
	44.938	0	0	0	33.25	30.467	47.7
mCherry-WTAP
Group	1	2	3	4	5	6	7
	0	53.69	0	54.528	0	63.88	32.64
	0	57.733	0	80.361	0	55.45	63.85
	0	52.917	0	48.81	0	44.75	45.75
	0	47.19	0	55.929	0	53.25	47.5
	0	65.589	0	47.361	0	43.708	49.44
	0	47.694	0	42.6	0	42.667	56.179
	0	54.381	0	58.312	0	45.062	45.042
	0	52.054	0	42.85	0	52.25	42.75
	0	49.311	0	48.938	0	39.667	37
	0	54.381	0	48.875	0	42.667	63.042
CFP-METTL3
Group	1	2	3	4	5	6	7
	0	0	14.347	88.453	28.25	0	74.417
	0	0	10.611	66.2	27.812	0	87.444
	0	0	9.25	76.867	29.958	0	58.833
	0	0	12.1	74.1	26.15	0	88.5
	0	0	10.35	96.964	14.222	0	61.167
	0	0	13.05	56.76	15.15	0	57
	0	0	8.75	42.55	19.85	0	68.542
	0	0	9	54.5	16	0	59.625
	0	0	9	35.133	14.7	0	73.85
	0	0	8.45	50.1	16.6	0	46.85
