# Supplementary material for: Phase transition of WTAP regulates m6A modification of interferon-stimulated genes
Source: eLife. 2025 May 27;13:RP100601. doi: 10.7554/eLife.100601 (PMC12113268; doi:10.7554/eLife.100601)
Supplement: Figure 6—source data 1. [file elife-100601-fig6-data1.xlsx]

## Sheet: a
IFIT1
ut			IFN-β
0.080818	0.00345	0.016698	0.325521	0.417782	0.368777
IFIT2
ut			IFN-β
0.111169	0.214764	0.154515	0.920712	1.51658	1.18167
OAS1
ut			IFN-β
0.461954	0.284366	0.362442	1.48023	1.48023	1.48023
OAS2
ut			IFN-β
0.605342	0.576672	0.590833	1.14538	0.983381	1.06129

## Sheet: b
IFIT1
ut			IFN-β
0.201775	0.110401	0.149252	2.2514	0.753052	1.30208
IFIT2
ut			IFN-β
0.200285	0.307961	0.292516	0.603247	0.607443	0.605342
OAS1
ut			IFN-β
0.364804	0.272688	0.268732	1.01806	0.804309	0.904895
OAS2
ut			IFN-β
0.428041	0.104808	0.211807	0.782315	0.943322	0.859055

## Sheet: c
IFIT1
Scr siRNA			STAT1 siRNA			PPP4 siRNA
0.640365	1.00484	0.802162	0.0208612	0.322409	0.082011	0.246894	0.252082	0.249475
IFIT2
Scr siRNA			STAT1 siRNA			PPP4 siRNA
0.748444	0.960572	0.8479	0.068014	0.124306	0.091948	0.171581	0.465536	0.282626
OAS1
Scr siRNA			STAT1 siRNA			PPP4 siRNA
1.63674	1.02159	1.29309	0.251011	0.294394	0.271839	0.844297	0.60116	0.712431
OAS2
Scr siRNA			STAT1 siRNA			PPP4 siRNA
0.702623	0.558962	0.626689	0.08138	0.08425	0.082803	0.252757	0.267168	0.259863

## Sheet: d
IFIT1
	wt			ko			WT res			5d			5a
	1.31714	1.31714	1.31714	0.000438	0.210842	0.009613	1.85627	1.24178	1.51825	0.091658	0.094235	0.092938	1.53944	0.536782	0.909035
IFIT2
	wt			ko			WT res			5d			5a
	0.629425	0.629425	0.629425	2e-05	2e-05	2e-05	0.66994	0.32356	0.46558	0.06662	0.06993	0.06826	0.4344	0.64043	0.52745
OAS1
	wt			ko			WT res			5d			5a
	2.38812	2.32281	2.35524	0.05937	0.05937	0.05937	2.90971	1.02163	1.72414	0.14769	0.176272	0.247564	2.67748	2.75275	2.71485
OAS2
	wt			ko			WT res			5d			5a
	1.46586	3.09075	1.19994	0.004195	0.023083	0.009841	1.84415	2.38329	2.09646	0.385772	0.324395	0.353755	2.15969	2.51546	2.33079

## Sheet: e
IFIT1
	UT			hex
WT	1.13986	1.40333	1.26475	0.370837	0.222035	0.286947
5D	0.429527	0.13498	0.240786	0.269027	0.244147	0.256285
5A	1.03804	1.8453	1.38401	0.322832	0.322832	0.322832
IFIT2
	UT			hex
WT	1.6516	1.6176	1.6345	0.398833	0.519018	0.454974
5D	0.599081	0.801526	0.692949	0.478245	0.385772	0.429527
5A	1.51452	1.07092	1.27355	0.503079	0.466147	0.484261
OAS1
	UT			hex
WT	1.1518	0.7922	0.9552	0.539186	0.524442	0.531763
5D	0.280451	0.298504	0.289337	0.145675	0.198997	0.170261
5A	1.18826	1.14779	1.16785	0.673083	0.241293	0.403001
OAS2
	UT			hex
WT	1.7337	1.541	2.2718	0.529924	0.61722	0.571908
5D	0.55318	0.425085	0.484921	0.481571	0.516136	0.498554
5A	1.34617	1.32763	1.33687	0.590028	0.598265	0.594132
