# Supplementary figures and images for: Phase transition of WTAP regulates m6A modification of interferon-stimulated genes
Source: eLife journal article supplement (doi:10.7554/elife.100601), 2024-09-26

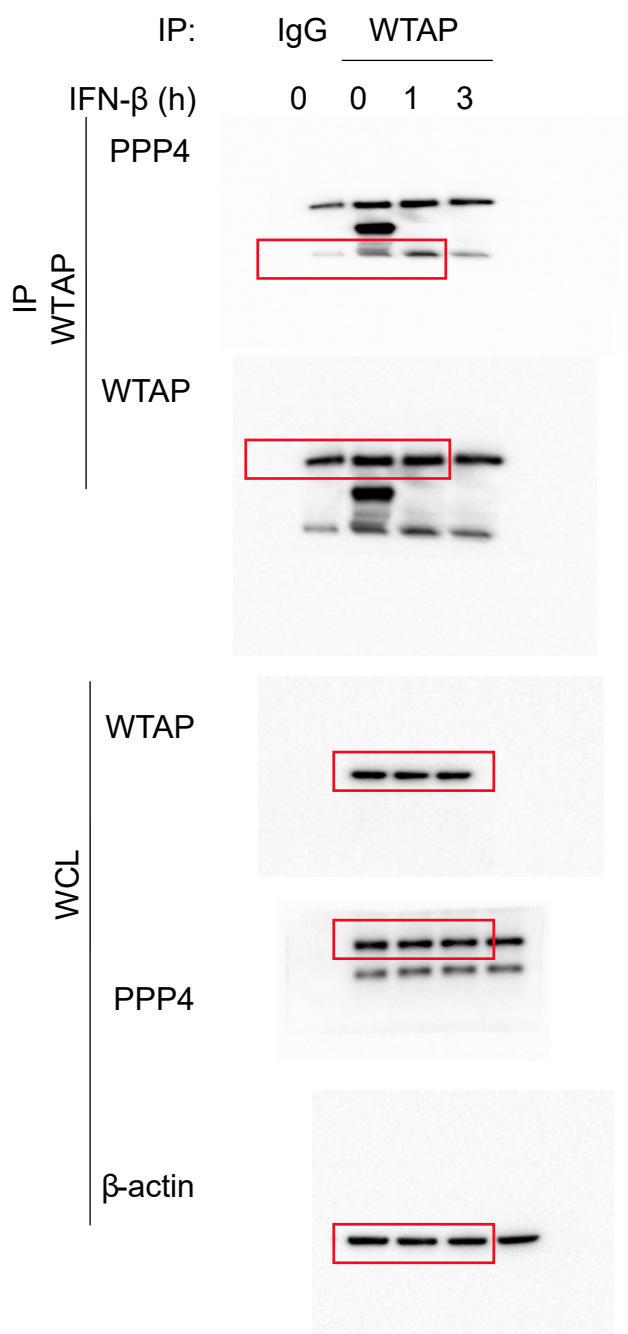

Figure 2B, source data 1: Original membranes corresponding to Figure 2B.

Supplement: fig2-data1 [file elife-100601-fig2-data1-v1.zip]

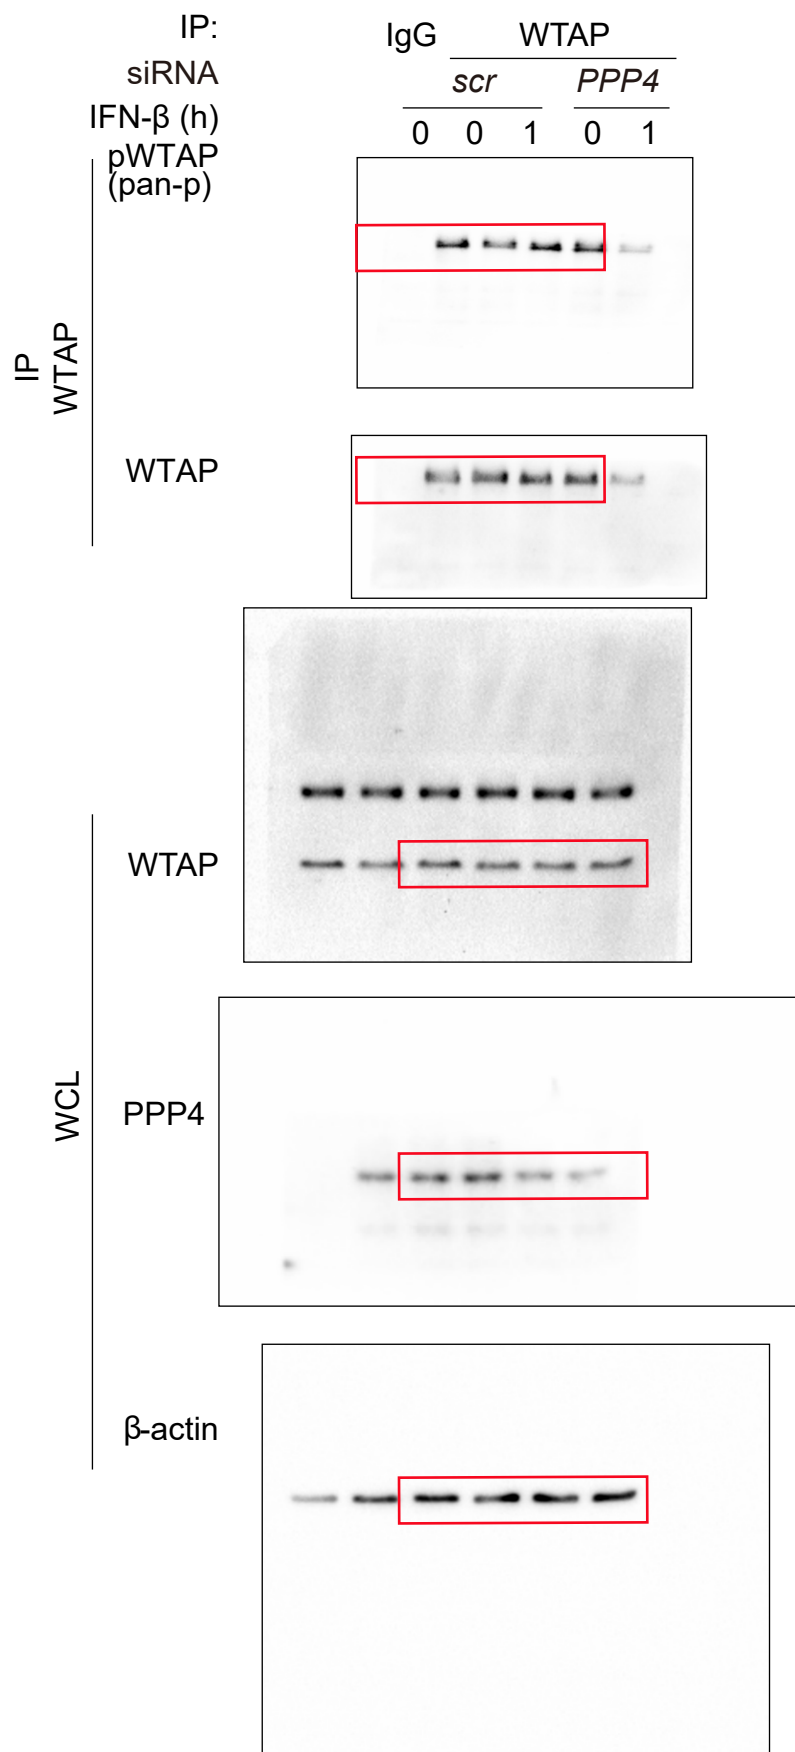

Figure 2C, source data 1: Original membranes corresponding to Figure 2C.

Supplement: fig2-data1 [file elife-100601-fig2-data1-v1.zip]

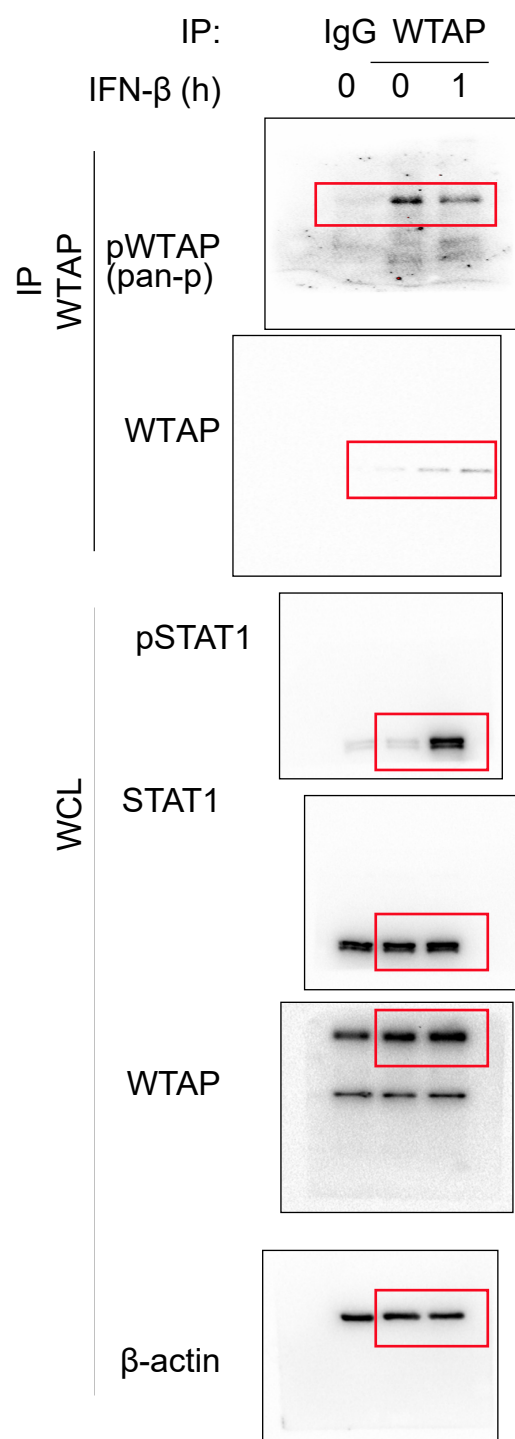

Figure 2A, source data 1: Original membranes corresponding to Figure 2A.

Supplement: fig2-data1 [file elife-100601-fig2-data1-v1.zip]

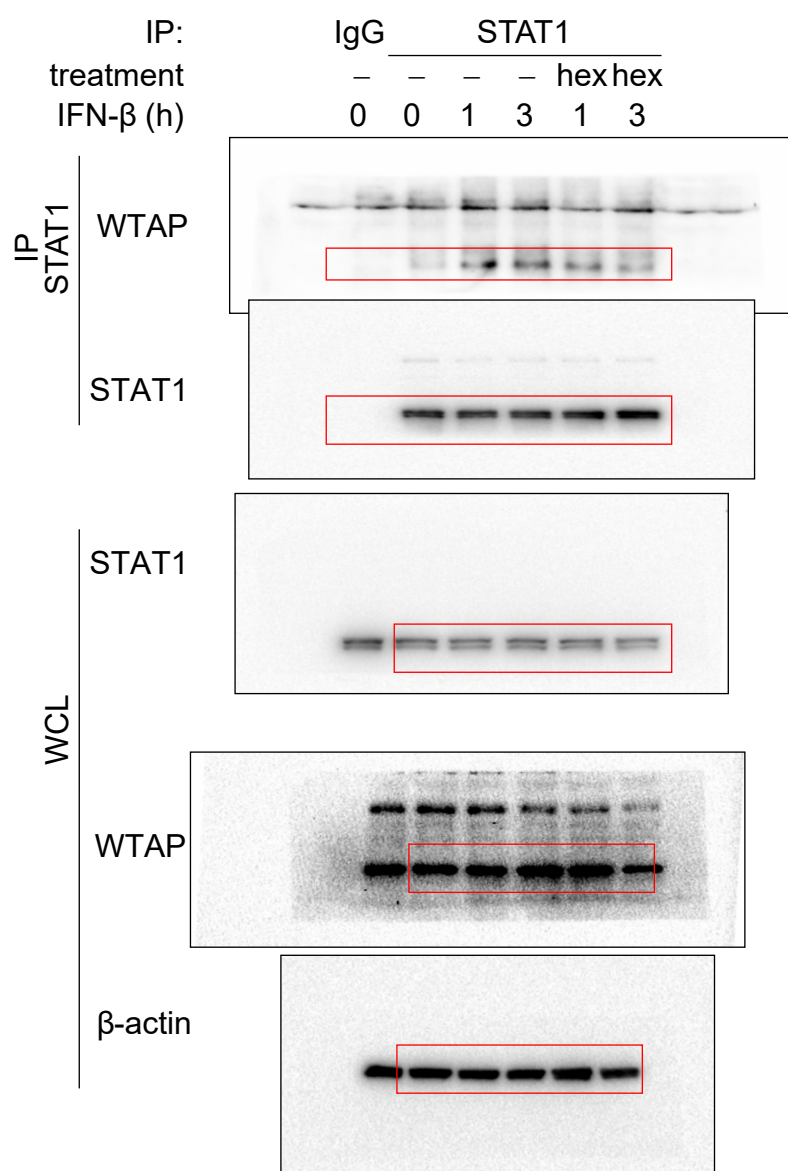

Figure 5E, source data 1: Original membranes corresponding to Figure 5E.

Supplement: fig5-data1 [file elife-100601-fig5-data1-v1.zip]

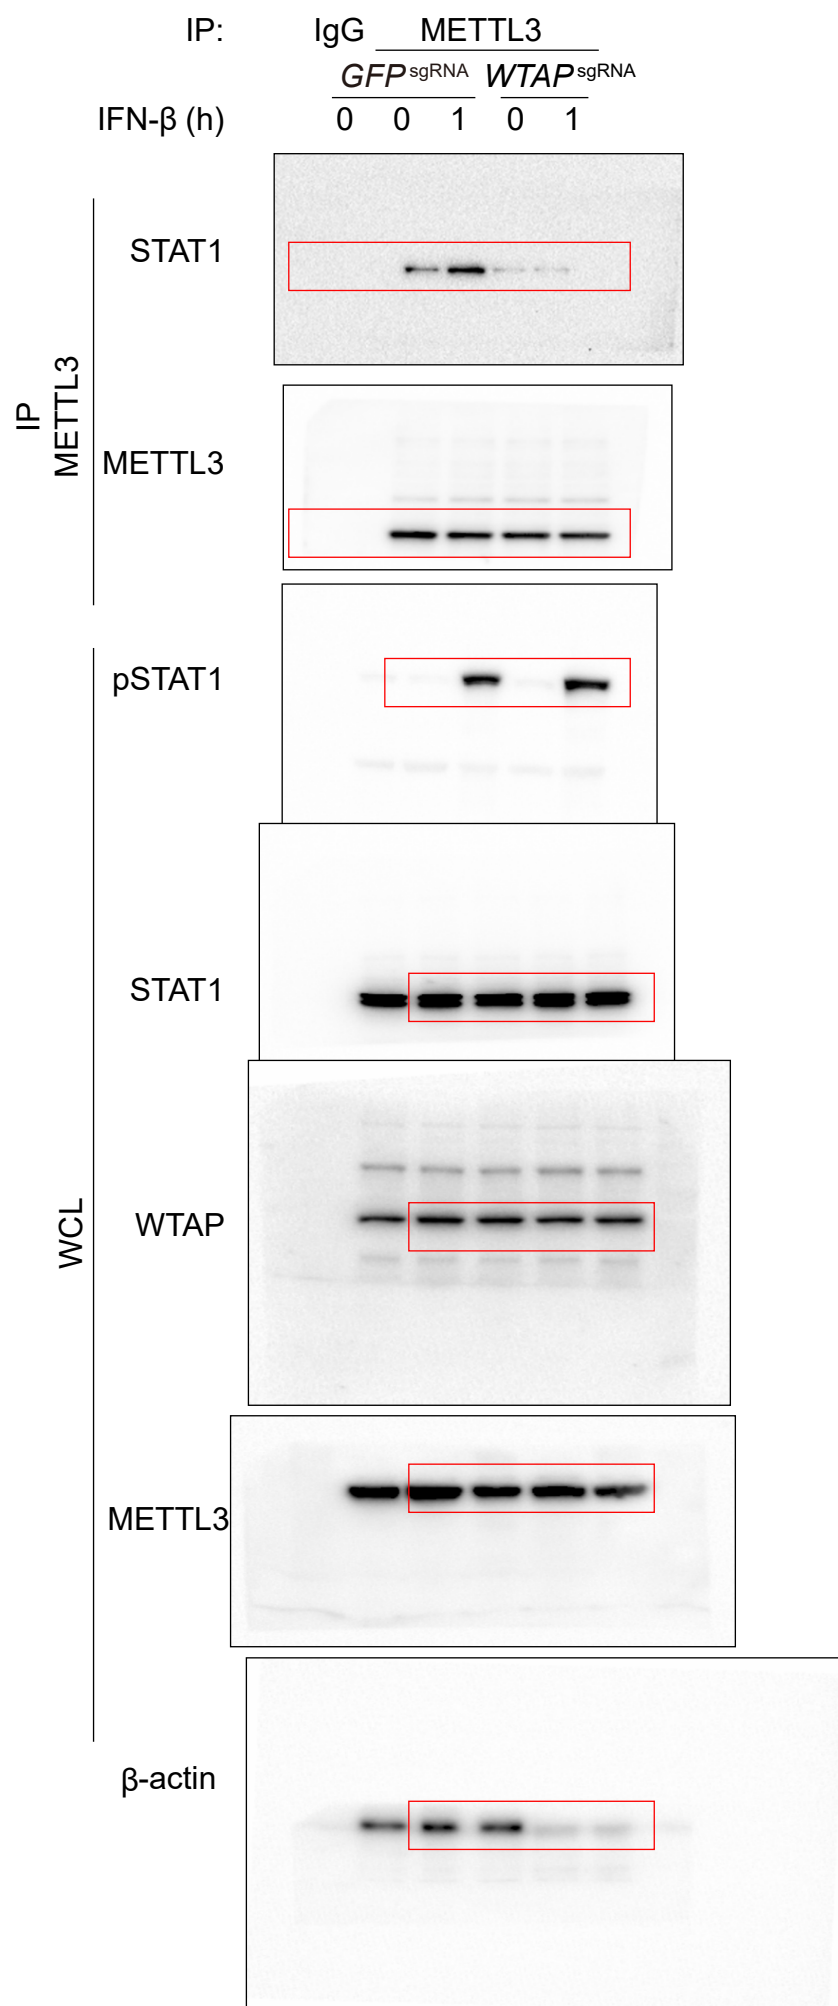

Figure 5C, source data 1: Original membranes corresponding to Figure 5C.

Supplement: fig5-data1 [file elife-100601-fig5-data1-v1.zip]

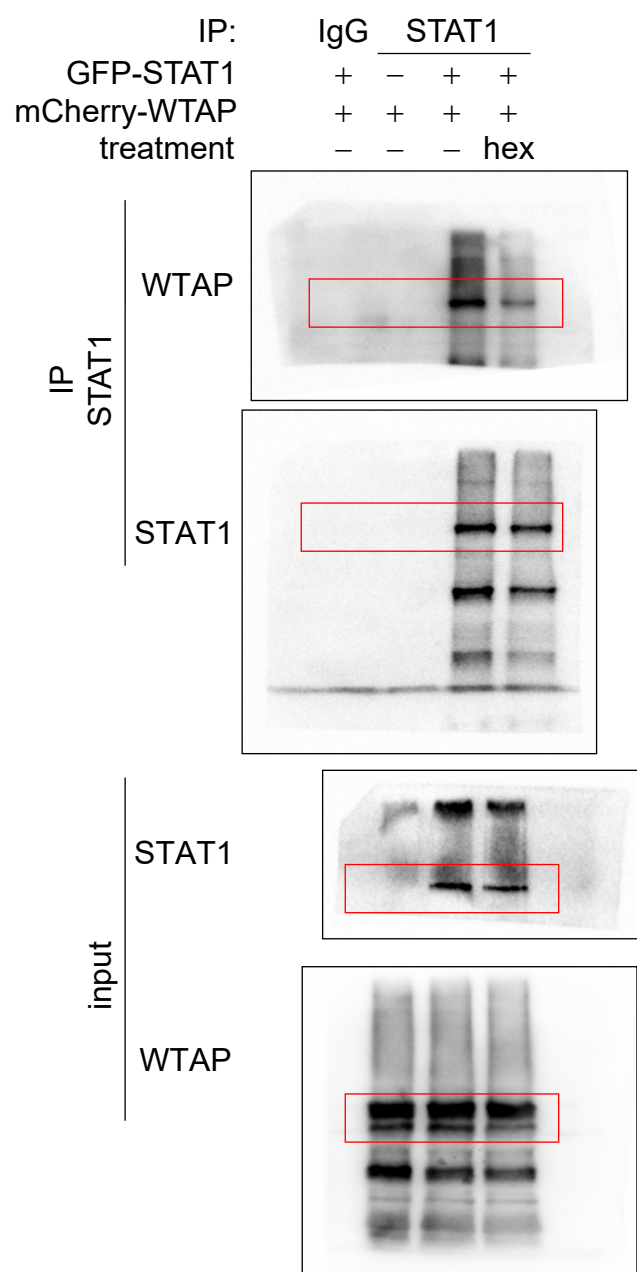

Figure 5F, source data 1: Original membranes corresponding to Figure 5F.

Supplement: fig5-data1 [file elife-100601-fig5-data1-v1.zip]

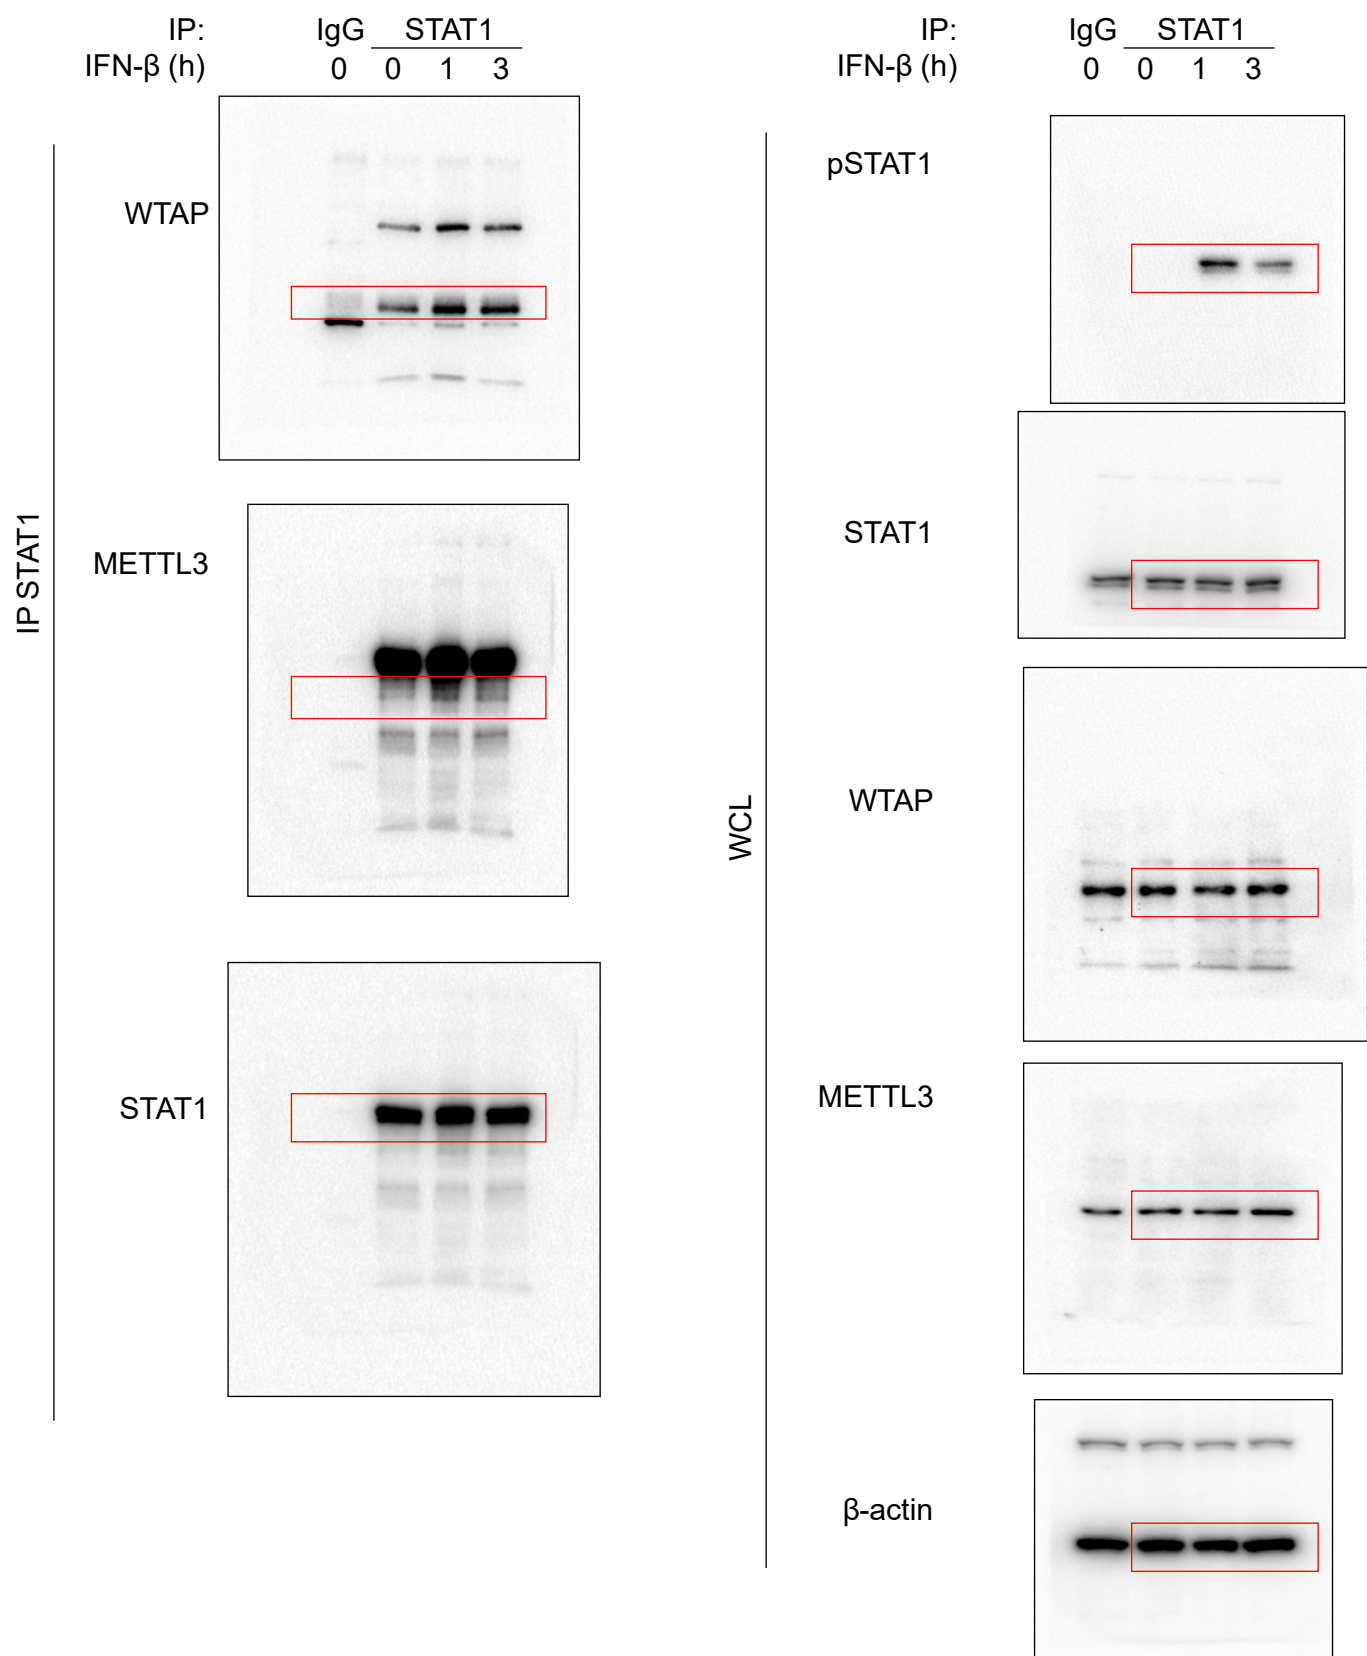

Figure 5B, source data 1: Original membranes corresponding to Figure 5B.

Supplement: fig5-data1 [file elife-100601-fig5-data1-v1.zip]
